# Supplementary material for: The Usefulness of Autoradiography for DNA Repair Proteins Activity Detection in the Cytoplasm towards Radiolabeled Oligonucleotides Containing 5′,8-Cyclo-2′-deoxyadenosine
Source: MDPI journal article supplement (doi:10.3390/chemosensors10060204), 2022-05-28
Supplement: s1 [file s1]

# The Usefulness of Autoradiography for DNA Repair Proteins Activity Detection in the Cytoplasm towards Radiolabeled Oligonucleotides Containing 5',8-cyclo-2'-deoxyadenosine

## Supplementary Materials

| Page  | Item              | Title                                                                                                                                                                  |
|-------|-------------------|------------------------------------------------------------------------------------------------------------------------------------------------------------------------|
| 2     | <b>Figure S1</b>  | Verification of the stability of oligos with cdPus (Control 2) after xrs5 CE treatment                                                                                 |
| 2     | <b>Table S1</b>   | The full sequence list of substrate ds-oligonucleotides                                                                                                                |
| 3-6   | <b>Figure S2</b>  | Mass spectra of substrate oligos                                                                                                                                       |
| 6     | <b>Table S2</b>   | The masses (calculated vs. found) of chosen substrate oligos                                                                                                           |
| 7     | <b>Figure S3</b>  | Verification of the ss-oligos labeling and hybridization and verification of the AP sites' formation (after UDG treatment) and SSBs' formation (after hAPE1 treatment) |
| 9-10  | <b>Table S3</b>   | Xrs5 – Control 1. Raw numerical data                                                                                                                                   |
| 11    | <b>Table S4</b>   | BJ – Control 1. Raw numerical data                                                                                                                                     |
| 12    | <b>Table S5</b>   | XPC – Control 1. Raw numerical data                                                                                                                                    |
| 13-14 | <b>Table S6</b>   | Xrs5 - ScdA. Raw numerical data                                                                                                                                        |
| 15-16 | <b>Table S7</b>   | Xrs5 - RcdA. Raw numerical data                                                                                                                                        |
| 17-18 | <b>Table S8</b>   | BJ - ScdA. Raw numerical data                                                                                                                                          |
| 19-20 | <b>Table S9</b>   | BJ - RcdA. Raw numerical data                                                                                                                                          |
| 21-22 | <b>Table S10</b>  | XPC - ScdA. Raw numerical data                                                                                                                                         |
| 23-24 | <b>Table S11</b>  | XPC - RcdA. Raw numerical data                                                                                                                                         |
| 26-27 | <b>Figure S4</b>  | The autoradiograms presenting results - ScdA by xrs5 Cytoplasmic Extract                                                                                               |
| 28-29 | <b>Figure S5</b>  | The autoradiograms presenting results - RcdA by xrs5 Cytoplasmic Extract                                                                                               |
| 30-31 | <b>Figure S6</b>  | The autoradiograms presenting results - ScdA by BJ Cytoplasmic Extract                                                                                                 |
| 32-33 | <b>Figure S7</b>  | The autoradiograms presenting results - RcdA by BJ Cytoplasmic Extract                                                                                                 |
| 34-35 | <b>Figure S8</b>  | The autoradiograms presenting results - ScdA by XPC Cytoplasmic Extract                                                                                                |
| 36-37 | <b>Figure S9</b>  | The autoradiograms presenting results - RcdA by XPC Cytoplasmic Extract                                                                                                |
| 39-41 | <b>Figure S10</b> | Endonucleolytic activity (strand degradation) [%] of xrs5 vs. BJ vs. XPC – comparison of individual strands – ScdA Cytoplasmic Extract.                                |
| 42-44 | <b>Figure S11</b> | Endonucleolytic activity (strand degradation) [%] of xrs5 vs. BJ vs. XPC – comparison of individual strands – RcdA Cytoplasmic Extract.                                |
| 45-47 | <b>Figure S12</b> | Polymerase activity (strand elongation) [%] of xrs5 vs. BJ vs. XPC – comparison of individual strands – ScdA Cytoplasmic Extract.                                      |
| 48-50 | <b>Figure S13</b> | Polymerase activity (strand elongation) [%] of xrs5 vs. BJ vs. XPC – comparison of individual strands – RcdA Cytoplasmic Extract.                                      |
| 51-53 | <b>Figure S14</b> | Exonucleolytic activity (strand degradation) [%] of xrs5 vs. BJ vs. XPC – comparison of individual strands – ScdA Cytoplasmic Extract.                                 |
| 54-56 | <b>Figure S15</b> | Exonucleolytic activity (strand degradation) [%] of xrs5 vs. BJ vs. XPC – comparison of individual strands – RcdA Cytoplasmic Extract.                                 |

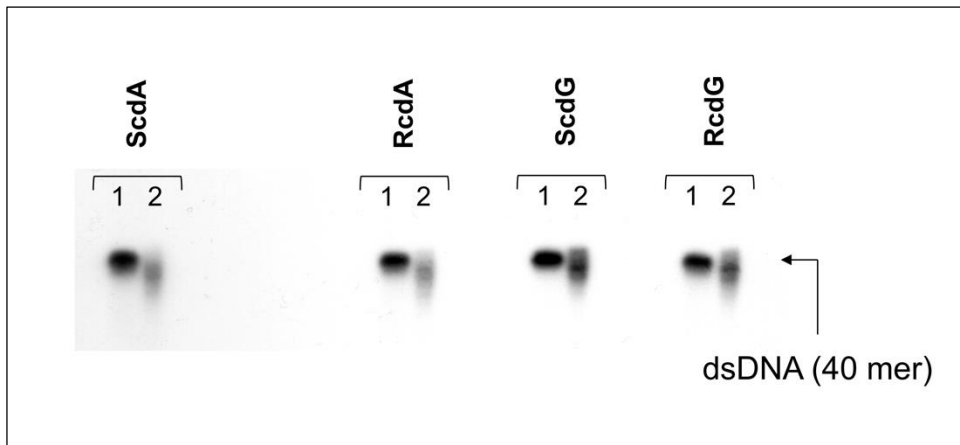

**Figure S1.** The stability of „matrix” oligonucleotides (Control 2) after treatment with 50 µg of xrs5 cytoplasmic extracts (CE). Each lane number corresponds with different assay time: lane 1 - 0 min; lane 2 - 120 min.

**Table S1.** The full sequence list of substrate ds-oligonucleotides with 2'-deoxyuridine (dU) and cdPus.

| Name      | Sequence                                                                                                 |
|-----------|----------------------------------------------------------------------------------------------------------|
| Control 1 | 5' -CTCTTGTCTCAGGAATATTGTCUCTATGCTCCCACCAAAGGC-3'<br>3' -GAGAACAGTCCTTATAACAGAGATACGAGGGTGGTTTCCG-5'     |
| Control 2 | 5' -GCCTTTGGTGGGAGCATAGXGACAATATTCCTGACAAGAG-3'<br>3' -CGGAAACCACCCTCGTATCTCTGTTATAAGGACTGTTCTC-5'       |
| dU-4      | 5' -CTCTTGTCTCAGGAATATTGTCUCTCTCTATGCTCCCACCAAAGGC-3'<br>3' -GAGAACAGTCCTTATAACAGXGATACGAGGGTGGTTTCCG-5' |
| dU-1      | 5' -CTCTTGTCTCAGGAATATTGTCUCTATGCTCCCACCAAAGGC-3'<br>3' -GAGAACAGTCCTTATAACAGXGATACGAGGGTGGTTTCCG-5'     |
| dU0       | 5' -CTCTTGTCTCAGGAATATTGTCUCTATGCTCCCACCAAAGGC-3'<br>3' -GAGAACAGTCCTTATAACAGXGATACGAGGGTGGTTTCCG-5'     |
| dU+1      | 5' -CTCTTGTCTCAGGAATATTGTCUATGCTCCCACCAAAGGC-3'<br>3' -GAGAACAGTCCTTATAACAGXGATACGAGGGTGGTTTCCG-5'       |
| dU+4      | 5' -CTCTTGTCTCAGGAATATTGTCCTAUGCTCCCACCAAAGGC-3'<br>3' -GAGAACAGTCCTTATAACAGXGATACGAGGGTGGTTTCCG-5'      |

U – represents 2'-deoxyuridine (a precursor of an AP site); X – represents (5'S)-5',8-cyclo-2'-deoxyadenosine (ScdA) or (5'R)-5',8-cyclo-2'-deoxyadenosine (RcdA).

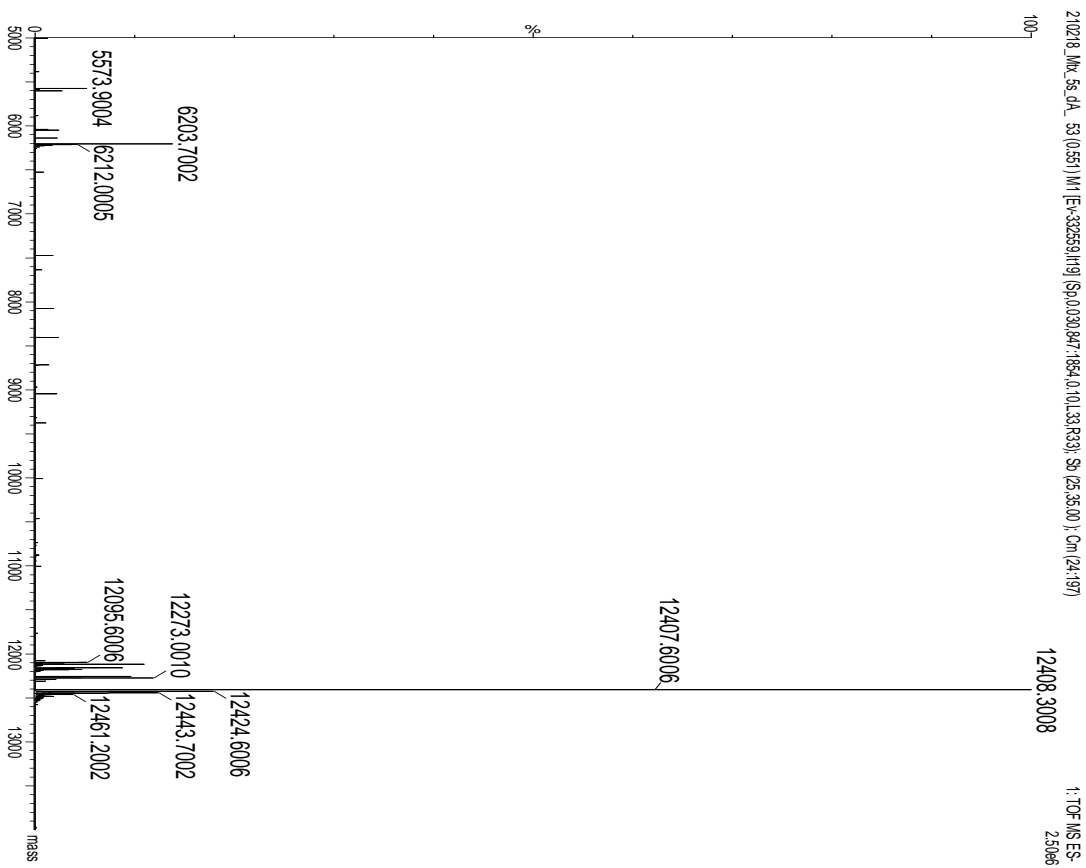

A.

B.

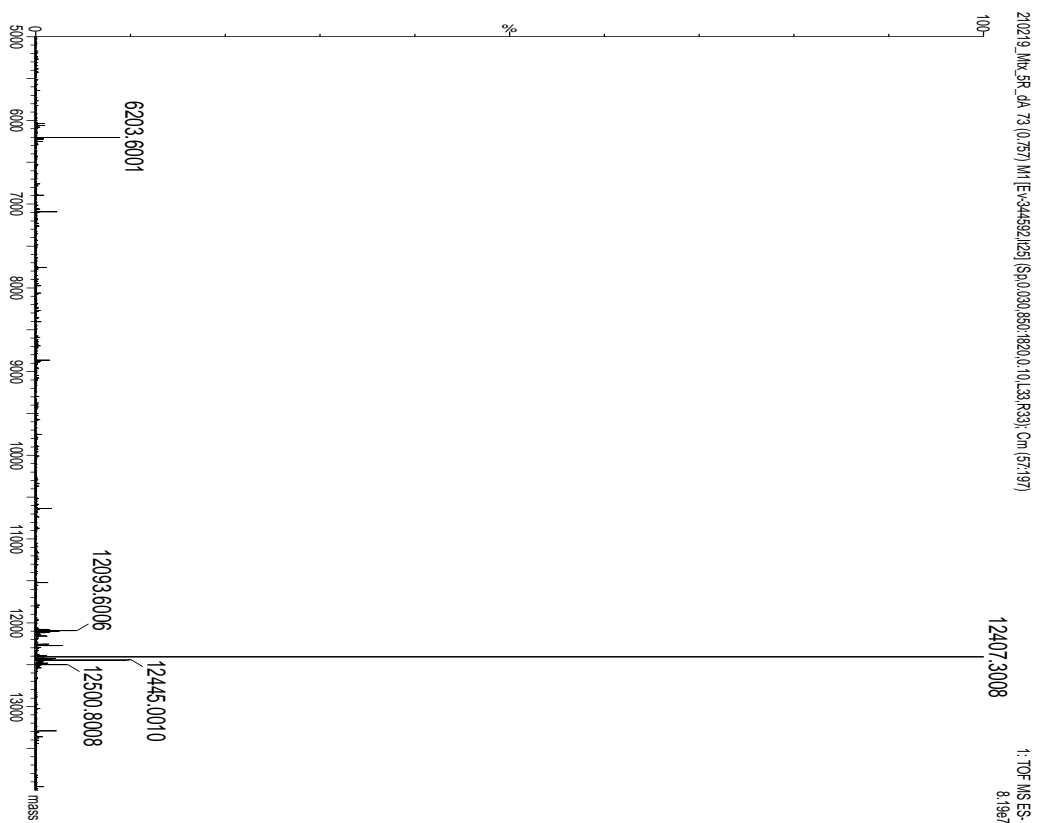

C.

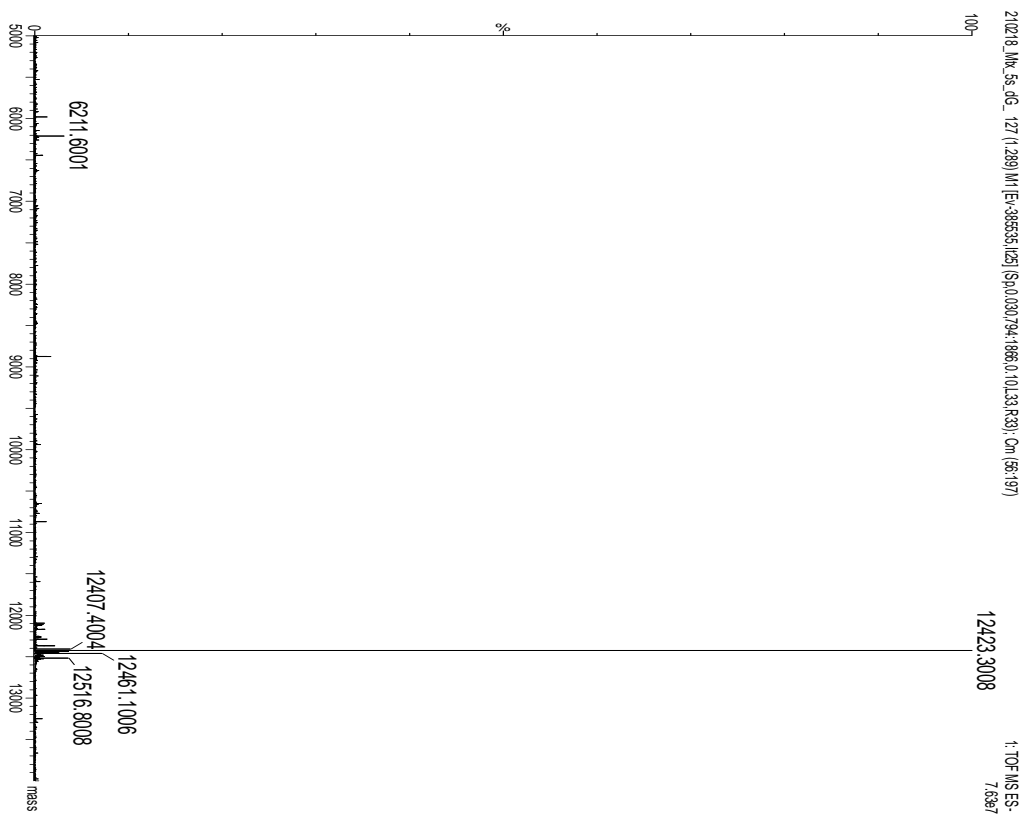

D.

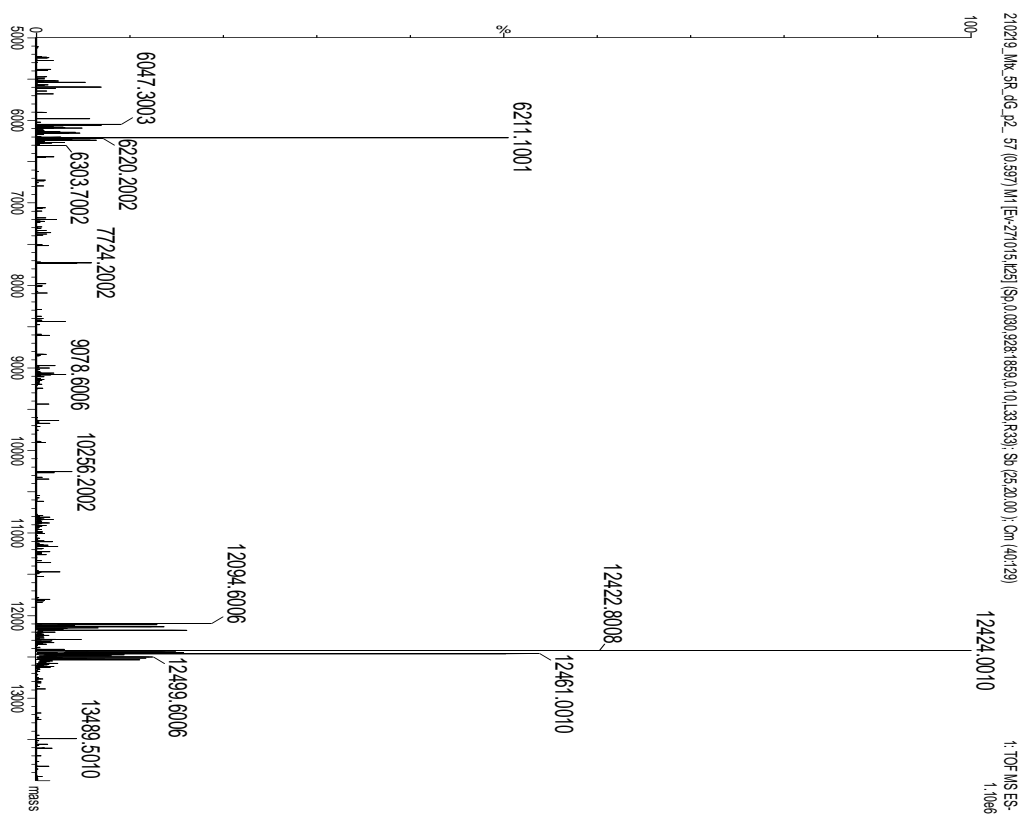

E.

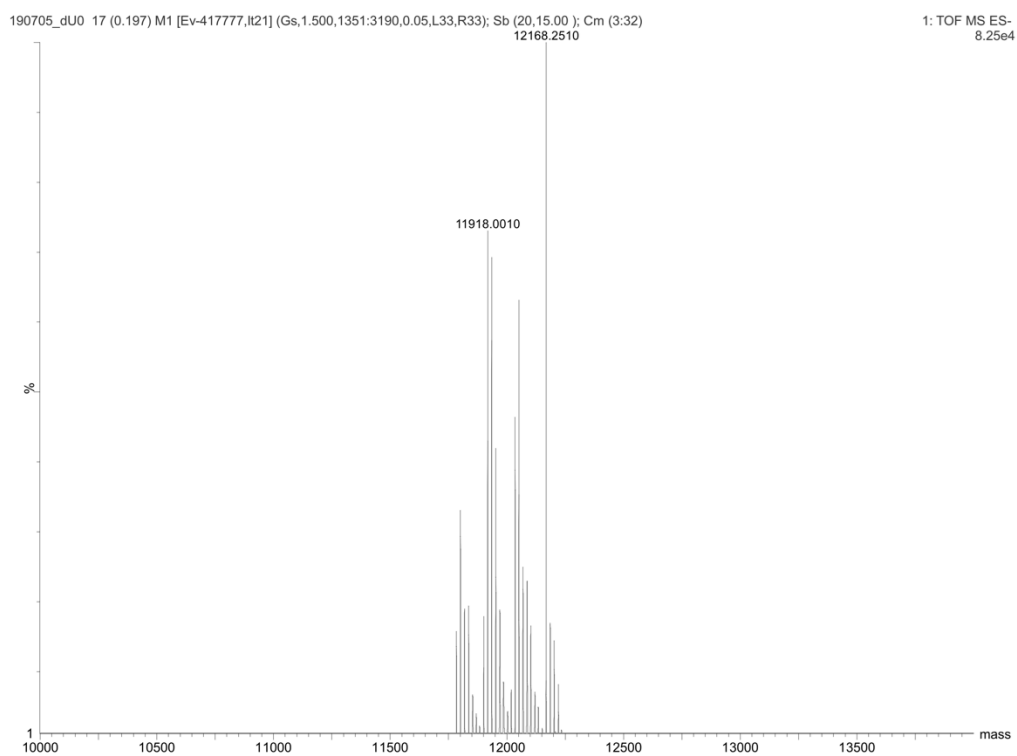

F.

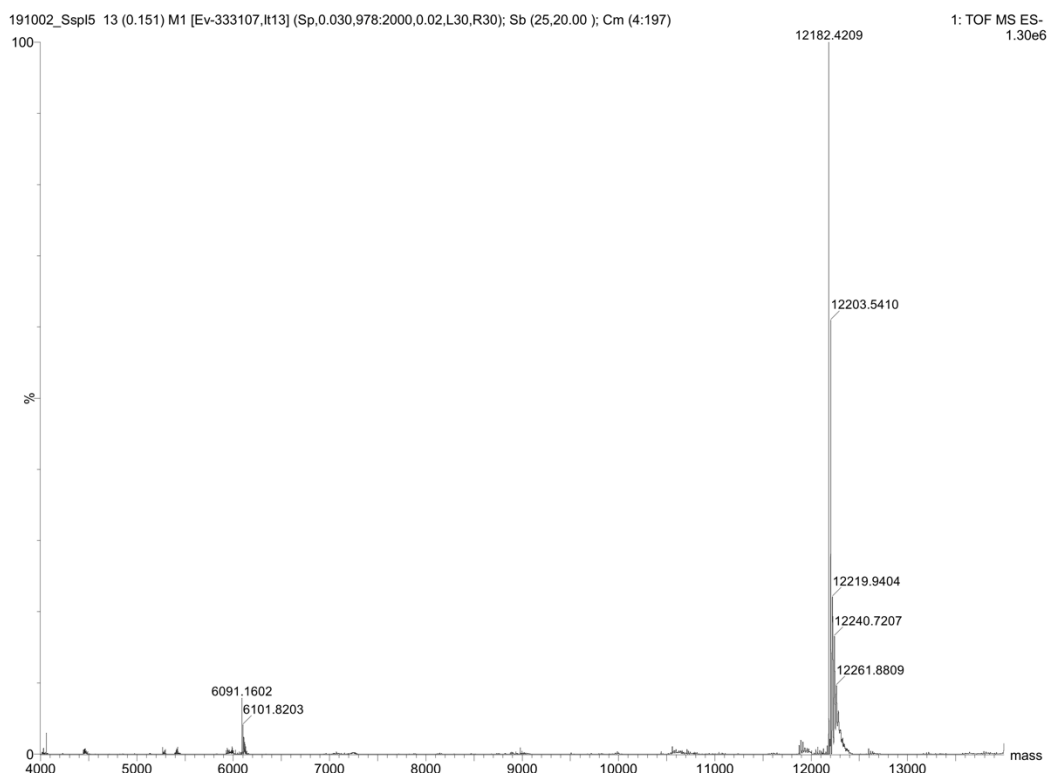

**Figure S2.** Mass spectra of substrate oligonucleotides containing cdPu. (A) ssDNA with (5'S)-5',8-cyclo-2'-deoxyadenosine (Mtx-ScdA); (B) ssDNA with (5'R)-5',8-cyclo-2'-deoxyadenosine (Mtx-RcdA); (C) ssDNA with (5'S)-5',8-cyclo-2'-deoxyguanosine (Mtx-ScdG); (D) ssDNA with (5'R)-5',8-cyclo-2'-deoxyguanosine (Mtx-RcdG); (E) ssDNA with 2'-deoxyuridine (Control 1 – dU strand); (F) native ssDNA (Control 1 – native strand).

**Table S2.** The masses (calculated vs. found) of chosen substrate oligos.

| Oligonucleotide           | Calculated Mass | Found Mass |
|---------------------------|-----------------|------------|
| Control 1 (dU strand)     | 12,167.90       | 12,168.25  |
| Control 1 (native strand) | 12,181.98       | 12,182.42  |
| Mtx-ScdA                  | 12,407.00       | 12,408.30  |
| Mtx-RcdA                  | 12,407.00       | 12,407.30  |
| Mtx-ScdG                  | 12,423.00       | 12,423.30  |
| Mtx-RcdG                  | 12,423.00       | 12,424.00  |

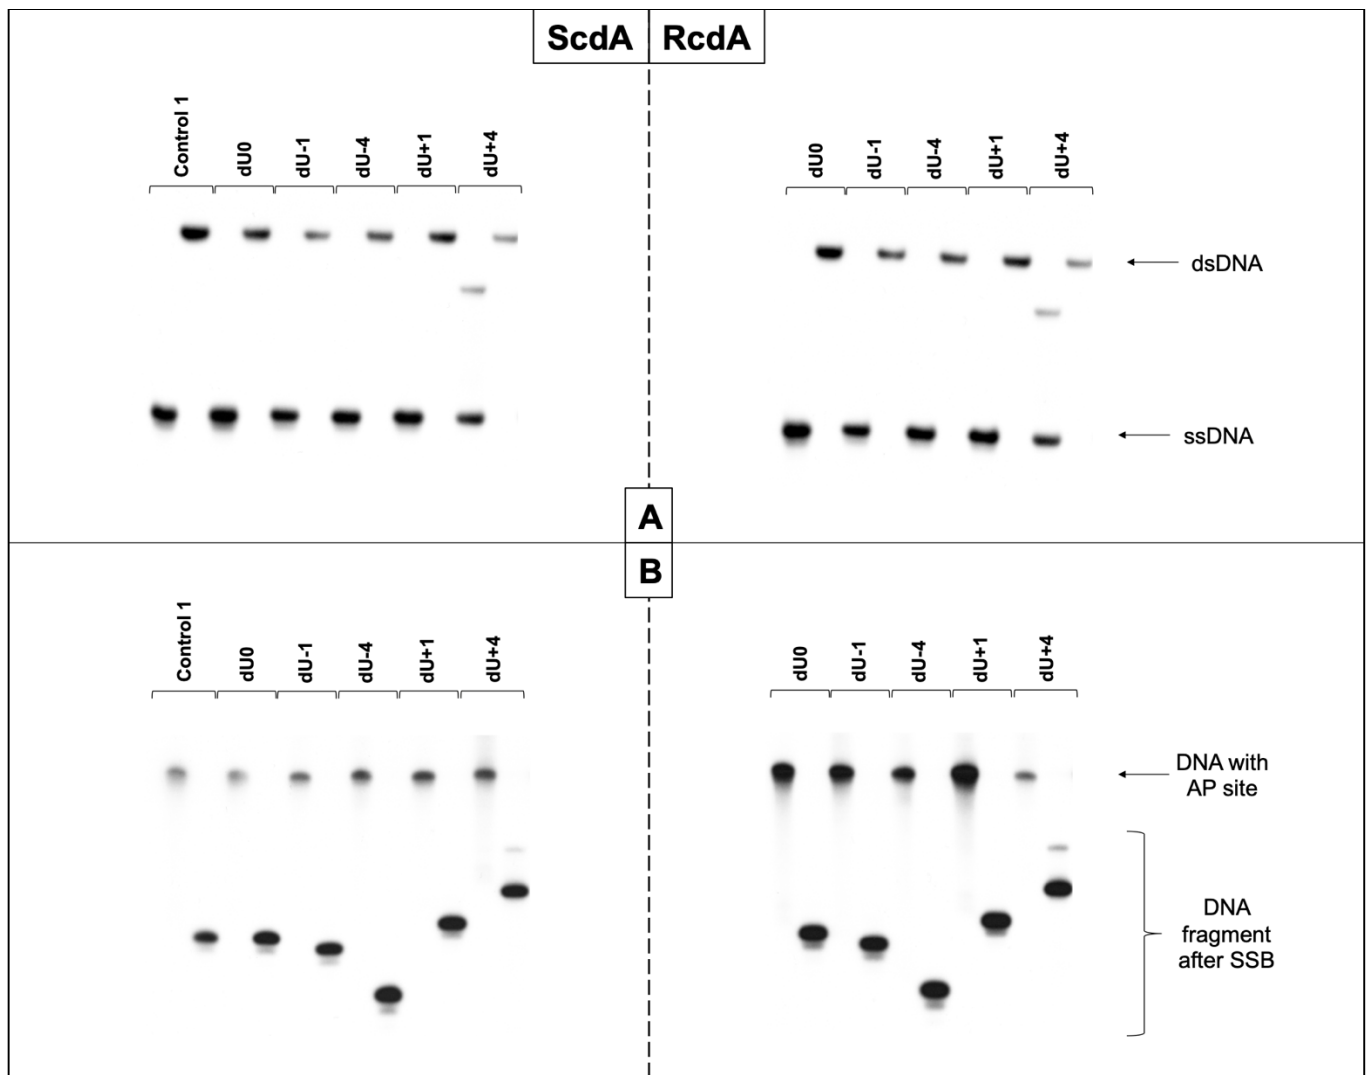

**Figure S3. (A)** Verification of radiolabeling of single-stranded (ssDNA) and efficient annealing of double-stranded (dsDNA) oligonucleotides on the 15% native polyacrylamide gel **(B)** Verification of AP sites' stability/purity and SSBs formation (after APE1 treatment) on the 15% denaturing polyacrylamide gel. SSB – single stranded break.

## Raw numerical data



**Table S3.** Xrs5 – Control 1. Raw numerical data of densitometry obtained from Quantity One software.

|           |          | Time [min]                |       |       |       |       |       |       |       |
|-----------|----------|---------------------------|-------|-------|-------|-------|-------|-------|-------|
|           |          | 0                         | 1     | 5     | 15    | 30    | 60    | 90    | 120   |
| Strand    | Data set | Endonuclease activity [%] |       |       |       |       |       |       |       |
| Control 1 | 1.       | 27,16                     | 87,28 | 83,54 | 73,30 | 54,33 | 22,16 | 14,80 | 12,67 |
|           | 2.       | 30,24                     | 67,12 | 56,67 | 50,53 | 43,83 | 26,37 | 14,58 | 12,74 |
|           | 3.       | 2,70                      | 53,70 | 52,80 | 43,71 | 35,69 | 23,62 | 14,76 | 7,31  |
|           | 4.       | 81,05                     | 80,54 | 75,51 | 61,75 | 44,63 | 19,35 | 13,60 | 10,58 |
|           | 5.       | 3,41                      | 64,10 | 52,09 | 43,44 | 38,29 | 24,70 | 17,44 | 9,71  |
|           | 6.       | 3,19                      | 46,62 | 45,36 | 41,57 | 38,76 | 24,98 | 14,55 | 8,91  |
|           | 7.       | 48,35                     | 78,23 | 73,57 | 61,75 | 56,31 | 26,62 | 23,19 | 5,66  |
|           | 8.       | 33,91                     | 85,42 | 83,60 | 57,12 | 44,71 | 28,11 | 3,59  | 1,65  |
|           | 9.       | 22,98                     | 62,34 | 62,62 | 54,45 | 48,43 | 34,05 | 18,43 | 10,97 |
|           | 10.      | 84,45                     | 82,38 | 70,51 | 52,59 | 33,69 | 6,89  | 5,49  | 6,42  |
|           | 11.      | 85,33                     | 80,06 | 66,44 | 54,67 | 35,85 | 12,44 | 8,46  | 7,32  |
|           | 12.      | 27,35                     | 64,21 | 57,68 | 45,84 | 36,30 | 7,69  | 11,04 | 6,17  |
|           | Avg      | 37,51                     | 71,00 | 65,03 | 53,39 | 42,57 | 21,42 | 13,33 | 8,34  |
|           | SD       | 30,96                     | 13,16 | 12,56 | 9,30  | 7,48  | 8,36  | 5,50  | 3,23  |

|           |          | Time [min]              |       |       |       |       |       |       |       |
|-----------|----------|-------------------------|-------|-------|-------|-------|-------|-------|-------|
|           |          | 0                       | 1     | 5     | 15    | 30    | 60    | 90    | 120   |
| Strand    | Data set | Polymerase activity [%] |       |       |       |       |       |       |       |
| Control 1 | 1.       | 4,54                    | 2,75  | 7,14  | 19,16 | 37,93 | 36,26 | 10,28 | 5,79  |
|           | 2.       | 4,60                    | 9,19  | 23,86 | 32,15 | 41,82 | 30,24 | 14,72 | 9,19  |
|           | 3.       | 11,39                   | 10,74 | 20,75 | 35,97 | 43,28 | 37,15 | 24,37 | 9,56  |
|           | 4.       | 2,88                    | 4,17  | 10,74 | 27,44 | 38,98 | 26,57 | 10,83 | 2,81  |
|           | 5.       | 2,44                    | 8,15  | 16,86 | 30,99 | 35,29 | 31,52 | 17,12 | 7,93  |
|           | 6.       | 1,88                    | 16,76 | 24,39 | 31,99 | 33,82 | 27,51 | 15,21 | 9,81  |
|           | 7.       | 7,68                    | 11,58 | 16,59 | 30,07 | 33,98 | 31,96 | 22,51 | 10,92 |
|           | 8.       | 4,70                    | 6,32  | 10,53 | 33,82 | 44,58 | 42,06 | 3,20  | 0,51  |
|           | 9.       | 14,30                   | 10,23 | 13,11 | 19,07 | 25,20 | 26,46 | 16,68 | 7,19  |
|           | 10.      | 7,42                    | 9,72  | 20,65 | 40,36 | 51,18 | 29,88 | 11,61 | 3,58  |
|           | 11.      | 6,84                    | 11,89 | 26,13 | 35,06 | 43,37 | 32,00 | 14,93 | 13,04 |
|           | 12.      | 1,15                    | 8,07  | 18,05 | 32,67 | 40,89 | 25,79 | 21,87 | 7,50  |
|           | Avg      | 5,82                    | 9,13  | 17,40 | 30,73 | 39,19 | 31,45 | 15,28 | 7,32  |
|           | SD       | 3,95                    | 3,71  | 6,07  | 6,30  | 6,64  | 4,95  | 5,94  | 3,62  |

|           |          | Time [min]               |       |       |       |       |       |      |      |
|-----------|----------|--------------------------|-------|-------|-------|-------|-------|------|------|
|           |          | 0                        | 1     | 5     | 15    | 30    | 60    | 90   | 120  |
| Strand    | Data set | Exonuclease activity [%] |       |       |       |       |       |      |      |
| Control 1 | 1.       | 1,57                     | 6,56  | 8,09  | 6,04  | 4,22  | 2,59  | 2,34 | 2,13 |
|           | 2.       | 1,11                     | 17,49 | 16,85 | 14,62 | 7,25  | 4,41  | 2,07 | 2,34 |
|           | 3.       | 2,05                     | 21,21 | 21,47 | 18,66 | 14,99 | 11,39 | 6,27 | 3,98 |
|           | 4.       | 15,54                    | 13,71 | 12,84 | 9,20  | 6,33  | 3,54  | 4,23 | 3,28 |
|           | 5.       | 0,00                     | 18,20 | 25,10 | 19,99 | 15,45 | 9,07  | 9,65 | 5,17 |
|           | 6.       | 0,56                     | 22,07 | 22,12 | 15,25 | 14,83 | 9,00  | 6,12 | 3,87 |
|           | 7.       | 2,39                     | 4,72  | 6,17  | 6,08  | 4,87  | 3,14  | 3,05 | 0,87 |
|           | 8.       | 2,62                     | 3,00  | 3,49  | 2,67  | 2,99  | 2,51  | 0,97 | 0,25 |

|  |     |      |       |       |       |       |      |      |      |
|--|-----|------|-------|-------|-------|-------|------|------|------|
|  | 9.  | 5,54 | 10,08 | 10,97 | 9,92  | 10,65 | 8,19 | 4,33 | 2,98 |
|  | 10. | 4,80 | 7,73  | 8,71  | 5,34  | 2,13  | 0,77 | 0,51 | 0,81 |
|  | 11. | 7,68 | 7,38  | 6,19  | 5,39  | 3,63  | 1,82 | 1,56 | 1,94 |
|  | 12. | 2,35 | 20,94 | 20,98 | 17,19 | 10,22 | 1,73 | 2,72 | 0,97 |
|  | Avg | 3,85 | 12,76 | 13,58 | 10,86 | 8,13  | 4,85 | 3,65 | 2,38 |
|  | SD  | 4,29 | 6,99  | 7,42  | 5,99  | 4,94  | 3,57 | 2,64 | 1,51 |

**Table S4.** BJ – Control 1. Raw numerical data of densitometry obtained from Quantity One software. \* rejected values.

|           |          | Time [min]                |       |       |       |       |       |       |       |
|-----------|----------|---------------------------|-------|-------|-------|-------|-------|-------|-------|
|           |          | 0                         | 1     | 5     | 15    | 30    | 60    | 90    | 120   |
| Strand    | Data set | Endonuclease activity [%] |       |       |       |       |       |       |       |
| Control 1 | 1.       | 2,57                      | 68,18 | 62,02 | 56,17 | 47,33 | 31,18 | 18,17 | 14,96 |
|           | 2.       | 3,51                      | 72,08 | 71,26 | 64,48 | 54,26 | 38,81 | 27,10 | 16,75 |
|           | 3.       | 0,14                      | 83,51 | 78,13 | 31,25 | 62,51 | 50,45 | 38,85 | 27,99 |
|           | 4.       | 1,53                      | 90,92 | 89,78 | 84,89 | 64,48 | 39,20 | 23,65 | 14,83 |
|           | 5.       | 6,27                      | 82,02 | 83,39 | 77,69 | 64,12 | 42,54 | 26,29 | 19,13 |
|           | 6.       | 0,79                      | 75,68 | 65,38 | 51,44 | 42,91 | 34,93 | 30,60 | 29,85 |
|           | Avg      | 2,47                      | 78,73 | 75,00 | 60,99 | 55,94 | 39,52 | 27,45 | 20,58 |
|           | SD       | 2,22                      | 8,33  | 10,71 | 19,30 | 9,27  | 6,63  | 6,96  | 6,67  |

|           |          | Time [min]              |      |       |       |       |       |       |       |
|-----------|----------|-------------------------|------|-------|-------|-------|-------|-------|-------|
|           |          | 0                       | 1    | 5     | 15    | 30    | 60    | 90    | 120   |
| Strand    | Data set | Polymerase activity [%] |      |       |       |       |       |       |       |
| Control 1 | 1.       | 2,45                    | 9,10 | 14,33 | 23,40 | 38,00 | 56,45 | 71,05 | 72,20 |
|           | 2.       | 2,11                    | 8,99 | 10,74 | 22,65 | 27,67 | 49,41 | 63,85 | 76,30 |
|           | 3.       | 0,46                    | 4,36 | 9,36  | 18,47 | 27,67 | 40,78 | 55,14 | 66,51 |
|           | 4.       | 0,72                    | 2,13 | 3,91  | 9,05  | 28,92 | 54,32 | 70,56 | 79,43 |
|           | 5.       | 1,85                    | 6,24 | 6,08  | 14,36 | 29,76 | 51,89 | 69,95 | 77,42 |
|           | 6.       | 0,74                    | 8,25 | 11,65 | 28,75 | 39,87 | 55,26 | 59,46 | 59,86 |
|           | Avg      | 1,39                    | 6,51 | 9,34  | 19,45 | 31,98 | 51,35 | 65,00 | 71,95 |
|           | SD       | 0,85                    | 2,82 | 3,80  | 7,03  | 5,48  | 5,76  | 6,65  | 7,49  |

|           |          | Time [min]               |       |       |       |       |       |      |      |
|-----------|----------|--------------------------|-------|-------|-------|-------|-------|------|------|
|           |          | 0                        | 1     | 5     | 15    | 30    | 60    | 90   | 120  |
| Strand    | Data set | Exonuclease activity [%] |       |       |       |       |       |      |      |
| Control 1 | 1.       | 0,45                     | 21,39 | 22,36 | 20,28 | 14,52 | 11,03 | 7,76 | 6,98 |
|           | 2.       | 1,05                     | 17,87 | 17,49 | 12,84 | 17,93 | 11,25 | 7,57 | 4,21 |
|           | 3.       | 0,04                     | 10,83 | 12,42 | 1,58  | 9,69  | 8,39  | 4,72 | 2,05 |
|           | 4.       | 0,18                     | 5,92  | 5,81  | 5,79  | 5,76  | 4,18  | 3,26 | 2,52 |
|           | 5.       | 4,59                     | 11,35 | 10,23 | 7,95  | 6,12  | 5,57  | 3,59 | 3,12 |
|           | 6.       | 0,15                     | 15,61 | 22,77 | 19,77 | 17,10 | 9,16  | 8,56 | 9,27 |
|           | Avg      | 1,08                     | 13,83 | 15,18 | 11,37 | 11,85 | 8,26  | 5,91 | 4,69 |
|           | SD       | 1,76                     | 5,56  | 6,85  | 7,63  | 5,41  | 2,88  | 2,33 | 2,85 |

**Table S5.** XPC – Control 1. Raw numerical data of densitometry obtained from Quantity One software. \* rejected values.

|           |          | Time [min]                |       |       |       |       |       |       |       |
|-----------|----------|---------------------------|-------|-------|-------|-------|-------|-------|-------|
|           |          | 0                         | 1     | 5     | 15    | 30    | 60    | 90    | 120   |
| Strand    | Data set | Endonuclease activity [%] |       |       |       |       |       |       |       |
| Control 1 | 1.       | 0,62                      | 71,04 | 68,78 | 61,72 | 48,16 | 34,55 | 30,01 | 17,16 |
|           | 2.       | 8,64                      | 66,97 | 63,32 | 54,93 | 43,37 | 24,96 | 18,53 | 11,46 |
|           | 3.       | 7,04                      | 64,27 | 63,85 | 57,44 | 44,03 | 28,74 | 5,98* | 8,58* |
|           | 4.       | 5,18                      | 53,37 | 46,01 | 46,36 | 40,94 | 34,45 | 30,64 | 26,27 |
|           | 5.       | 0,97                      | 63,01 | 54,92 | 57,99 | 46,49 | 40,74 | 31,34 | 19,44 |
|           | 6.       | 0,57                      | 65,40 | 54,26 | 52,19 | 43,80 | 39,13 | 40,61 | 31,96 |
|           | Avg      | 3,84                      | 64,01 | 58,52 | 55,11 | 44,47 | 33,76 | 30,22 | 21,26 |
|           | SD       | 3,59                      | 5,91  | 8,30  | 5,34  | 2,53  | 6,02  | 7,85  | 8,00  |

|           |          | Time [min]              |       |       |       |       |       |        |       |
|-----------|----------|-------------------------|-------|-------|-------|-------|-------|--------|-------|
|           |          | 0                       | 1     | 5     | 15    | 30    | 60    | 90     | 120   |
| Strand    | Data set | Polymerase activity [%] |       |       |       |       |       |        |       |
| Control 1 | 1.       | 3,79                    | 8,11  | 13,72 | 20,81 | 34,53 | 47,47 | 48,41  | 48,44 |
|           | 2.       | 12,30                   | 12,66 | 13,46 | 26,63 | 41,82 | 56,56 | 52,68  | 47,71 |
|           | 3.       | 5,76                    | 14,21 | 13,38 | 24,24 | 36,20 | 43,08 | 13,66* | 30,34 |
|           | 4.       | 9,37                    | 17,26 | 26,42 | 27,89 | 35,74 | 45,40 | 42,67  | 42,45 |
|           | 5.       | 5,46                    | 7,86  | 20,57 | 20,67 | 30,83 | 37,06 | 48,56  | 53,82 |
|           | 6.       | 4,34                    | 11,17 | 25,05 | 26,69 | 35,78 | 39,61 | 38,52  | 46,32 |
|           | Avg      | 6,84                    | 11,88 | 18,77 | 24,49 | 35,82 | 44,86 | 46,17  | 44,85 |
|           | SD       | 3,31                    | 3,63  | 6,07  | 3,13  | 3,54  | 6,86  | 5,57   | 8,00  |

|           |          | Time [min]               |       |       |       |       |       |       |       |
|-----------|----------|--------------------------|-------|-------|-------|-------|-------|-------|-------|
|           |          | 0                        | 1     | 5     | 15    | 30    | 60    | 90    | 120   |
| Strand    | Data set | Exonuclease activity [%] |       |       |       |       |       |       |       |
| Control 1 | 1.       | 0,17                     | 18,73 | 15,97 | 17,15 | 15,98 | 9,89  | 9,77  | 4,84  |
|           | 2.       | 1,85                     | 18,27 | 22,49 | 18,30 | 13,50 | 7,33  | 7,54  | 5,38  |
|           | 3.       | 1,25                     | 16,72 | 19,90 | 16,78 | 15,21 | 10,72 | 1,72  | 2,92  |
|           | 4.       | 0,69                     | 23,06 | 26,55 | 25,57 | 22,52 | 15,36 | 19,13 | 16,06 |
|           | 5.       | 0,01                     | 19,01 | 23,40 | 20,15 | 21,14 | 18,88 | 12,75 | 7,73  |
|           | 6.       | 0,07                     | 20,37 | 19,68 | 20,74 | 19,47 | 18,76 | 19,91 | 16,43 |
|           | Avg      | 0,67                     | 19,36 | 21,33 | 19,78 | 17,97 | 13,49 | 11,80 | 8,89  |
|           | SD       | 0,75                     | 2,16  | 3,65  | 3,25  | 3,60  | 4,87  | 6,99  | 5,90  |

**Table S6.** Xrs5 - ScdA. Raw numerical data of densitometry obtained from Quantity One software.

| xrs5 / ScdA |          | Time [min]                |       |       |       |       |       |       |       |
|-------------|----------|---------------------------|-------|-------|-------|-------|-------|-------|-------|
|             |          | 0                         | 1     | 5     | 15    | 30    | 60    | 90    | 120   |
| Strand      | Data set | Endonuclease activity [%] |       |       |       |       |       |       |       |
| dU0         | 1.       | 19,35                     | 90,09 | 86,84 | 86,76 | 86,88 | 86,48 | 83,78 | 80,59 |
|             | 2.       | 16,68                     | 74,70 | 72,80 | 68,97 | 63,98 | 63,69 | 60,44 | 56,61 |
|             | 3.       | 0,61                      | 73,44 | 73,08 | 68,24 | 62,93 | 60,14 | 62,70 | 58,25 |
|             | Avg      | 12,21                     | 79,41 | 77,57 | 74,66 | 71,26 | 70,11 | 68,97 | 65,15 |
|             | SD       | 10,14                     | 9,27  | 8,03  | 10,49 | 13,53 | 14,29 | 12,88 | 13,40 |
| dU-1        | 1.       | 2,02                      | 73,91 | 62,55 | 30,61 | 19,89 | 17,80 | 16,37 | 16,80 |
|             | 2.       | 2,77                      | 55,27 | 48,63 | 44,29 | 36,96 | 29,70 | 27,72 | 25,56 |
|             | 3.       | 0,51                      | 43,55 | 40,38 | 31,86 | 27,36 | 21,89 | 18,17 | 17,11 |
|             | Avg      | 1,77                      | 57,58 | 50,52 | 35,58 | 28,07 | 23,13 | 20,75 | 19,82 |
|             | SD       | 1,15                      | 15,31 | 11,21 | 7,56  | 8,56  | 6,04  | 6,10  | 4,97  |
| dU-4        | 1.       | 7,72                      | 83,54 | 85,31 | 87,27 | 83,07 | 54,26 | 37,25 | 32,04 |
|             | 2.       | 17,91                     | 86,88 | 76,85 | 57,37 | 39,12 | 2,95  | 1,49  | 2,29  |
|             | 3.       | 0,23                      | 66,64 | 64,83 | 41,88 | 23,87 | 14,27 | 8,97  | 8,64  |
|             | Avg      | 8,62                      | 79,02 | 75,66 | 62,17 | 48,69 | 23,83 | 15,90 | 14,33 |
|             | SD       | 8,87                      | 10,85 | 10,29 | 23,08 | 30,74 | 26,96 | 18,86 | 15,67 |
| dU+1        | 1.       | 13,15                     | 83,27 | 86,84 | 70,91 | 58,91 | 36,19 | 13,76 | 5,43  |
|             | 2.       | 29,74                     | 55,38 | 51,46 | 48,97 | 42,01 | 30,36 | 21,76 | 23,78 |
|             | 3.       | 0,97                      | 74,23 | 70,84 | 60,04 | 38,76 | 20,43 | 11,20 | 3,52  |
|             | Avg      | 14,62                     | 70,96 | 69,71 | 59,98 | 46,56 | 28,99 | 15,57 | 10,91 |
|             | SD       | 14,44                     | 14,23 | 17,72 | 10,97 | 10,82 | 7,97  | 5,51  | 11,19 |
| dU+4        | 1.       | 0,14                      | 24,44 | 77,11 | 78,71 | 57,71 | 29,69 | 10,82 | 4,62  |
|             | 2.       | 0,32                      | 40,38 | 48,53 | 45,09 | 34,97 | 22,25 | 13,42 | 20,87 |
|             | 3.       | 0,91                      | 54,80 | 71,78 | 50,71 | 37,18 | 14,35 | 7,06  | 2,38  |
|             | Avg      | 0,46                      | 39,87 | 65,80 | 58,17 | 43,29 | 22,10 | 10,43 | 9,29  |
|             | SD       | 0,41                      | 15,18 | 15,20 | 18,01 | 12,54 | 7,67  | 3,20  | 10,09 |

| xrs5 / ScdA |          | Time [min]              |       |       |       |       |       |       |       |
|-------------|----------|-------------------------|-------|-------|-------|-------|-------|-------|-------|
|             |          | 0                       | 1     | 5     | 15    | 30    | 60    | 90    | 120   |
| Strand      | Data set | Polymerase activity [%] |       |       |       |       |       |       |       |
| dU0         | 1.       | 3,51                    | 0,57  | 0,57  | 0,46  | 0,46  | 0,77  | 0,84  | 0,54  |
|             | 2.       | 2,29                    | 2,11  | 1,92  | 1,85  | 2,38  | 2,95  | 2,45  | 1,77  |
|             | 3.       | 3,42                    | 3,23  | 2,34  | 2,93  | 1,91  | 1,55  | 1,65  | 1,12  |
|             | Avg      | 3,07                    | 1,97  | 1,61  | 1,75  | 1,58  | 1,76  | 1,65  | 1,14  |
|             | SD       | 0,68                    | 1,34  | 0,92  | 1,24  | 1,00  | 1,10  | 0,80  | 0,62  |
| dU-1        | 1.       | 0,73                    | 8,57  | 25,18 | 62,55 | 73,30 | 67,09 | 57,36 | 43,49 |
|             | 2.       | 2,44                    | 11,95 | 32,78 | 46,06 | 55,19 | 51,89 | 41,64 | 42,23 |
|             | 3.       | 3,12                    | 18,51 | 33,64 | 42,81 | 47,41 | 45,91 | 39,54 | 35,57 |
|             | Avg      | 2,10                    | 13,01 | 30,54 | 50,47 | 58,63 | 54,96 | 46,18 | 40,43 |
|             | SD       | 1,23                    | 5,05  | 4,65  | 10,58 | 13,28 | 10,92 | 9,74  | 4,26  |
| dU-4        | 1.       | 0,40                    | 6,53  | 8,25  | 7,13  | 9,81  | 24,34 | 26,62 | 25,39 |
|             | 2.       | 3,62                    | 8,65  | 22,65 | 41,85 | 55,01 | 59,10 | 54,61 | 23,76 |
|             | 3.       | 0,08                    | 16,25 | 28,28 | 53,39 | 65,25 | 61,26 | 56,38 | 36,14 |
|             | Avg      | 1,37                    | 10,47 | 19,73 | 34,12 | 43,36 | 48,24 | 45,87 | 28,43 |
|             | SD       | 1,95                    | 5,11  | 10,33 | 24,08 | 29,50 | 20,72 | 16,70 | 6,73  |

|      |     |      |       |       |       |       |       |       |       |
|------|-----|------|-------|-------|-------|-------|-------|-------|-------|
| dU+1 | 1.  | 1,32 | 1,26  | 1,10  | 0,37  | 0,29  | 0,09  | 0,04  | 0,02  |
|      | 2.  | 0,10 | 0,01  | 0,00  | 1,28  | 0,56  | 0,41  | 0,38  | 0,10  |
|      | 3.  | 1,60 | 3,23  | 1,48  | 2,32  | 0,60  | 0,36  | 0,02  | 0,00  |
|      | Avg | 1,01 | 1,50  | 0,86  | 1,32  | 0,48  | 0,29  | 0,15  | 0,04  |
|      | SD  | 0,80 | 1,63  | 0,77  | 0,98  | 0,17  | 0,17  | 0,20  | 0,06  |
| dU+4 | 1.  | 0,26 | 1,41  | 4,62  | 10,61 | 20,73 | 24,14 | 14,38 | 6,83  |
|      | 2.  | 1,32 | 17,40 | 22,52 | 28,73 | 28,99 | 19,57 | 17,44 | 40,90 |
|      | 3.  | 1,46 | 5,02  | 9,14  | 20,61 | 20,73 | 16,36 | 13,18 | 5,26  |
|      | Avg | 1,01 | 7,94  | 12,09 | 19,98 | 23,49 | 20,03 | 15,00 | 17,66 |
|      | SD  | 0,65 | 8,38  | 9,31  | 9,08  | 4,77  | 3,91  | 2,20  | 20,14 |

| xrs5 / ScdA |          | Time [min]               |       |       |       |       |       |       |       |
|-------------|----------|--------------------------|-------|-------|-------|-------|-------|-------|-------|
|             |          | 0                        | 1     | 5     | 15    | 30    | 60    | 90    | 120   |
| Strand      | Data set | Exonuclease activity [%] |       |       |       |       |       |       |       |
| dU0         | 1.       | 1,05                     | 8,38  | 12,34 | 12,73 | 12,62 | 12,69 | 15,27 | 18,76 |
|             | 2.       | 0,68                     | 21,55 | 24,82 | 28,59 | 32,97 | 32,58 | 35,98 | 40,18 |
|             | 3.       | 0,08                     | 19,86 | 24,20 | 28,75 | 35,09 | 38,25 | 35,57 | 40,57 |
|             | Avg      | 0,60                     | 16,60 | 20,45 | 23,36 | 26,89 | 27,84 | 28,94 | 33,17 |
|             | SD       | 0,49                     | 7,17  | 7,03  | 9,20  | 12,41 | 13,42 | 11,84 | 12,48 |
| dU-1        | 1.       | 0,67                     | 7,18  | 8,52  | 4,24  | 2,77  | 2,04  | 2,32  | 2,81  |
|             | 2.       | 0,05                     | 9,57  | 12,55 | 8,43  | 5,17  | 3,05  | 3,45  | 3,50  |
|             | 3.       | 0,00                     | 17,53 | 17,90 | 15,70 | 13,71 | 10,20 | 9,15  | 8,95  |
|             | Avg      | 0,24                     | 11,43 | 12,99 | 9,46  | 7,22  | 5,09  | 4,97  | 5,09  |
|             | SD       | 0,38                     | 5,42  | 4,71  | 5,80  | 5,75  | 4,45  | 3,66  | 3,36  |
| dU-4        | 1.       | 0,00                     | 6,54  | 4,74  | 4,32  | 3,07  | 0,81  | 0,53  | 0,32  |
|             | 2.       | 0,00                     | 0,00  | 0,00  | 0,00  | 0,00  | 0,00  | 0,00  | 0,00  |
|             | 3.       | 0,15                     | 6,42  | 4,91  | 2,14  | 0,26  | 0,00  | 0,00  | 0,00  |
|             | Avg      | 0,05                     | 4,32  | 3,22  | 2,15  | 1,11  | 0,27  | 0,18  | 0,11  |
|             | SD       | 0,08                     | 3,74  | 2,79  | 2,16  | 1,70  | 0,47  | 0,31  | 0,18  |
| dU+1        | 1.       | 0,27                     | 6,08  | 8,55  | 28,12 | 40,49 | 63,47 | 86,06 | 94,36 |
|             | 2.       | 2,67                     | 18,84 | 33,57 | 47,89 | 56,40 | 66,04 | 76,63 | 75,62 |
|             | 3.       | 0,00                     | 10,81 | 24,20 | 36,59 | 59,93 | 78,91 | 88,23 | 95,64 |
|             | Avg      | 0,98                     | 11,91 | 22,11 | 37,53 | 52,28 | 69,47 | 83,64 | 88,54 |
|             | SD       | 1,47                     | 6,45  | 12,64 | 9,91  | 10,36 | 8,27  | 6,17  | 11,21 |
| dU+4        | 1.       | 0,00                     | 0,35  | 4,64  | 7,70  | 16,65 | 33,54 | 42,11 | 42,11 |
|             | 2.       | 1,04                     | 4,55  | 15,84 | 23,45 | 28,60 | 35,94 | 39,34 | 31,51 |
|             | 3.       | 0,66                     | 3,34  | 10,06 | 22,99 | 33,09 | 50,19 | 59,52 | 64,86 |
|             | Avg      | 0,57                     | 2,75  | 10,18 | 18,05 | 26,11 | 39,89 | 46,99 | 46,16 |
|             | SD       | 0,53                     | 2,16  | 5,60  | 8,97  | 8,49  | 9,00  | 10,94 | 17,04 |

**Table S7.** Xrs5 - RcdA. Raw numerical data of densitometry obtained from Quantity One software.

| xrs5 / RcdA |          | Time [min]                |       |       |       |       |       |       |       |
|-------------|----------|---------------------------|-------|-------|-------|-------|-------|-------|-------|
|             |          | 0                         | 1     | 5     | 15    | 30    | 60    | 90    | 120   |
| Strand      | Data set | Endonuclease activity [%] |       |       |       |       |       |       |       |
| dU0         | 1.       | 77,10                     | 82,72 | 78,23 | 71,76 | 69,85 | 65,84 | 62,61 | 59,21 |
|             | 2.       | 0,86                      | 64,58 | 64,30 | 60,99 | 57,99 | 57,60 | 55,85 | 53,80 |
|             | 3.       | 0,87                      | 60,76 | 59,46 | 59,11 | 58,90 | 52,00 | 51,59 | 56,45 |
|             | Avg      | 26,28                     | 69,35 | 67,33 | 63,95 | 62,25 | 58,48 | 56,68 | 56,49 |
|             | SD       | 44,01                     | 11,73 | 9,75  | 6,82  | 6,60  | 6,96  | 5,56  | 2,71  |
| dU-1        | 1.       | 56,57                     | 57,45 | 53,38 | 41,19 | 30,18 | 30,37 | 24,58 | 18,89 |
|             | 2.       | 0,80                      | 40,81 | 35,30 | 30,70 | 26,25 | 22,98 | 18,25 | 12,49 |
|             | 3.       | 0,43                      | 37,42 | 37,79 | 34,04 | 33,31 | 28,89 | 23,61 | 17,47 |
|             | Avg      | 19,27                     | 45,23 | 42,16 | 35,31 | 29,91 | 27,41 | 22,15 | 16,28 |
|             | SD       | 32,31                     | 10,72 | 9,80  | 5,36  | 3,54  | 3,91  | 3,41  | 3,36  |
| dU-4        | 1.       | 47,73                     | 52,83 | 54,21 | 58,37 | 59,42 | 38,91 | 47,36 | 35,47 |
|             | 2.       | 3,70                      | 62,81 | 59,31 | 49,05 | 28,72 | 11,02 | 8,84  | 8,56  |
|             | 3.       | 14,30                     | 65,76 | 69,75 | 72,18 | 69,56 | 56,72 | 60,00 | 56,84 |
|             | Avg      | 21,91                     | 60,47 | 61,09 | 59,87 | 52,57 | 35,55 | 38,73 | 33,62 |
|             | SD       | 22,98                     | 6,78  | 7,92  | 11,64 | 21,27 | 23,04 | 26,65 | 24,19 |
| dU+1        | 1.       | 74,57                     | 83,80 | 77,65 | 66,67 | 52,03 | 30,01 | 15,84 | 11,99 |
|             | 2.       | 3,82                      | 56,35 | 53,19 | 43,36 | 35,70 | 7,96  | 11,86 | 4,42  |
|             | 3.       | 3,55                      | 51,54 | 46,23 | 40,84 | 32,56 | 19,07 | 12,63 | 7,56  |
|             | Avg      | 27,32                     | 63,89 | 59,02 | 50,29 | 40,10 | 19,02 | 13,44 | 7,99  |
|             | SD       | 40,93                     | 17,41 | 16,50 | 14,24 | 10,45 | 11,03 | 2,11  | 3,80  |
| dU+4        | 1.       | 79,15                     | 23,87 | 63,19 | 47,15 | 25,69 | 5,70  | 4,28  | 3,68  |
|             | 2.       | 1,61                      | 44,04 | 46,27 | 38,04 | 23,09 | 8,87  | 4,17  | 1,20  |
|             | 3.       | 1,70                      | 37,45 | 43,58 | 39,64 | 30,98 | 13,67 | 5,16  | 1,00  |
|             | Avg      | 27,49                     | 40,74 | 51,01 | 41,61 | 26,59 | 9,41  | 4,54  | 1,96  |
|             | SD       | 44,74                     | 4,66  | 10,63 | 4,86  | 4,02  | 4,01  | 0,54  | 1,49  |

| xrs5 / RcdA |          | Time [min]              |       |       |       |       |       |       |       |
|-------------|----------|-------------------------|-------|-------|-------|-------|-------|-------|-------|
|             |          | 0                       | 1     | 5     | 15    | 30    | 60    | 90    | 120   |
| Strand      | Data set | Polymerase activity [%] |       |       |       |       |       |       |       |
| dU0         | 1.       | 0,72                    | 0,96  | 0,90  | 2,55  | 3,06  | 2,63  | 1,97  | 2,52  |
|             | 2.       | 0,79                    | 1,93  | 0,79  | 0,52  | 0,67  | 0,32  | 0,28  | 0,19  |
|             | 3.       | 1,13                    | 3,06  | 2,62  | 3,09  | 2,90  | 2,86  | 1,09  | 1,58  |
|             | Avg      | 0,88                    | 1,98  | 1,43  | 2,05  | 2,21  | 1,93  | 1,12  | 1,43  |
|             | SD       | 0,22                    | 1,05  | 1,03  | 1,35  | 1,34  | 1,40  | 0,85  | 1,17  |
| dU-1        | 1.       | 12,95                   | 13,85 | 24,48 | 44,69 | 57,71 | 53,36 | 45,87 | 36,91 |
|             | 2.       | 4,03                    | 17,03 | 30,23 | 37,69 | 42,23 | 39,43 | 34,11 | 18,66 |
|             | 3.       | 1,80                    | 26,13 | 31,69 | 35,30 | 37,10 | 40,32 | 29,96 | 25,60 |
|             | Avg      | 6,26                    | 19,00 | 28,80 | 39,23 | 45,68 | 44,37 | 36,65 | 27,06 |
|             | SD       | 5,90                    | 6,37  | 3,82  | 4,88  | 10,73 | 7,80  | 8,25  | 9,21  |
| dU-4        | 1.       | 2,92                    | 5,29  | 7,42  | 9,29  | 25,38 | 32,42 | 23,51 | 28,72 |
|             | 2.       | 0,00                    | 0,00  | 37,19 | 48,93 | 62,91 | 67,89 | 64,34 | 63,14 |
|             | 3.       | 2,35                    | 11,91 | 10,70 | 16,06 | 19,62 | 20,89 | 19,23 | 14,70 |
|             | Avg      | 1,75                    | 5,73  | 18,44 | 24,76 | 35,97 | 40,40 | 35,70 | 35,52 |
|             | SD       | 1,55                    | 5,97  | 16,32 | 21,20 | 23,51 | 24,49 | 24,90 | 24,92 |

|      |     |      |       |       |       |       |       |       |       |
|------|-----|------|-------|-------|-------|-------|-------|-------|-------|
| dU+1 | 1.  | 0,51 | 0,90  | 0,46  | 0,45  | 0,21  | 0,08  | 0,06  | 0,08  |
|      | 2.  | 4,79 | 12,70 | 8,88  | 3,88  | 4,40  | 0,34  | 0,63  | 0,25  |
|      | 3.  | 4,64 | 11,03 | 10,45 | 7,58  | 4,55  | 1,29  | 0,48  | 0,03  |
|      | Avg | 3,31 | 8,21  | 6,60  | 3,97  | 3,05  | 0,57  | 0,39  | 0,12  |
|      | SD  | 2,43 | 6,39  | 5,37  | 3,57  | 2,46  | 0,64  | 0,29  | 0,12  |
| dU+4 | 1.  | 2,96 | 0,27  | 12,43 | 28,24 | 37,83 | 19,92 | 14,88 | 21,45 |
|      | 2.  | 5,48 | 9,22  | 15,94 | 26,14 | 30,86 | 25,74 | 18,46 | 8,71  |
|      | 3.  | 6,01 | 16,93 | 21,52 | 30,81 | 32,64 | 25,37 | 17,67 | 17,66 |
|      | Avg | 4,82 | 13,08 | 16,63 | 28,40 | 33,78 | 23,68 | 17,00 | 15,94 |
|      | SD  | 1,63 | 5,45  | 4,58  | 2,34  | 3,63  | 3,26  | 1,88  | 6,54  |

| xrs5 / RcdA |          | Time [min]               |       |       |       |       |       |       |       |
|-------------|----------|--------------------------|-------|-------|-------|-------|-------|-------|-------|
|             |          | 0                        | 1     | 5     | 15    | 30    | 60    | 90    | 120   |
| Strand      | Data set | Exonuclease activity [%] |       |       |       |       |       |       |       |
| dU0         | 1.       | 21,94                    | 15,97 | 20,63 | 25,11 | 25,08 | 27,57 | 30,75 | 34,10 |
|             | 2.       | 0,14                     | 30,45 | 33,27 | 38,38 | 41,23 | 41,94 | 43,65 | 45,81 |
|             | 3.       | 0,15                     | 32,18 | 37,23 | 37,68 | 37,98 | 44,93 | 47,31 | 41,71 |
|             | Avg      | 7,41                     | 26,20 | 30,38 | 33,72 | 34,76 | 38,15 | 40,57 | 40,54 |
|             | SD       | 12,59                    | 8,90  | 8,67  | 7,47  | 8,54  | 9,28  | 8,70  | 5,94  |
| dU-1        | 1.       | 29,03                    | 21,51 | 19,73 | 11,41 | 7,44  | 7,39  | 8,96  | 8,92  |
|             | 2.       | 0,00                     | 15,92 | 22,07 | 20,34 | 17,45 | 16,13 | 13,39 | 12,93 |
|             | 3.       | 0,06                     | 25,22 | 23,78 | 21,98 | 18,85 | 14,84 | 18,00 | 14,22 |
|             | Avg      | 9,70                     | 20,88 | 21,86 | 17,91 | 14,58 | 12,78 | 13,45 | 12,03 |
|             | SD       | 16,74                    | 4,68  | 2,03  | 5,69  | 6,22  | 4,72  | 4,52  | 2,77  |
| dU-4        | 1.       | 48,86                    | 39,62 | 37,32 | 30,37 | 5,98  | 1,74  | 2,83  | 1,91  |
|             | 2.       | 1,00                     | 2,73  | 3,50  | 2,02  | 0,49  | 0,06  | 0,00  | 0,05  |
|             | 3.       | 4,05                     | 17,98 | 17,93 | 8,84  | 2,24  | 0,43  | 0,27  | 0,20  |
|             | Avg      | 17,97                    | 20,11 | 19,58 | 13,74 | 2,90  | 0,74  | 1,04  | 0,72  |
|             | SD       | 26,80                    | 18,54 | 16,97 | 14,80 | 2,81  | 0,89  | 1,56  | 1,03  |
| dU+1        | 1.       | 24,28                    | 11,31 | 20,27 | 32,32 | 47,17 | 69,54 | 83,86 | 87,59 |
|             | 2.       | 0,00                     | 24,51 | 35,08 | 51,80 | 59,21 | 91,45 | 87,05 | 94,66 |
|             | 3.       | 0,28                     | 33,01 | 42,35 | 51,21 | 62,67 | 79,54 | 86,85 | 91,93 |
|             | Avg      | 8,19                     | 22,94 | 32,57 | 45,11 | 56,35 | 80,18 | 85,92 | 91,40 |
|             | SD       | 13,94                    | 10,93 | 11,26 | 11,08 | 8,13  | 10,97 | 1,79  | 3,56  |
| dU+4        | 1.       | 5,38                     | 0,98  | 11,01 | 21,41 | 29,54 | 41,82 | 50,69 | 48,70 |
|             | 2.       | 0,26                     | 9,60  | 15,76 | 28,18 | 36,20 | 47,02 | 53,59 | 59,85 |
|             | 3.       | 0,00                     | 8,81  | 15,39 | 25,97 | 30,83 | 44,93 | 58,96 | 39,75 |
|             | Avg      | 1,88                     | 9,20  | 14,05 | 25,18 | 32,19 | 44,59 | 54,42 | 49,43 |
|             | SD       | 3,03                     | 0,56  | 2,64  | 3,45  | 3,53  | 2,62  | 4,20  | 10,07 |



**Table S8.** BJ - ScdA. Raw numerical data of densitometry obtained from Quantity One software. \* rejected values, \*\* not applicable.

| BJ / ScdA |          | Time [min]                |       |       |       |       |       |       |       |
|-----------|----------|---------------------------|-------|-------|-------|-------|-------|-------|-------|
|           |          | 0                         | 1     | 5     | 15    | 30    | 60    | 90    | 120   |
| Strand    | Data set | Endonuclease activity [%] |       |       |       |       |       |       |       |
| dU0       | 1.       | 1,31                      | 87,04 | 83,06 | 77,28 | 71,67 | 68,00 | 70,11 | 71,58 |
|           | 2.       | 1,94                      | 77,98 | 73,56 | 64,58 | 61,45 | 59,77 | 59,80 | 60,53 |
|           | 3.       | 0,85                      | 67,21 | 59,78 | 59,82 | 55,63 | 54,76 | 55,56 | 61,65 |
|           | Avg      | 1,37                      | 77,41 | 72,13 | 67,23 | 62,92 | 60,84 | 61,82 | 64,59 |
|           | SD       | 0,55                      | 9,93  | 11,70 | 9,02  | 8,12  | 6,69  | 7,49  | 6,08  |
| dU-1      | 1.       | 0,10                      | 81,64 | 69,42 | 47,13 | 31,39 | 21,53 | 20,16 | 13,89 |
|           | 2.       | 1,12                      | 58,11 | 58,24 | 44,08 | 35,54 | 29,85 | 22,77 | 22,73 |
|           | 3.       | **                        | **    | **    | **    | **    | **    | **    | **    |
|           | Avg      | 0,61                      | 69,87 | 63,83 | 45,60 | 33,46 | 25,69 | 21,47 | 18,31 |
|           | SD       | 0,72                      | 16,64 | 7,91  | 2,16  | 2,94  | 5,89  | 1,85  | 6,25  |
| dU-4      | 1.       | 0,23                      | 85,91 | 82,53 | 62,25 | 44,40 | 11,41 | 11,83 | 5,87  |
|           | 2.       | 1,47                      | 75,18 | 71,83 | 60,67 | 42,19 | 10,80 | 4,02  | 7,45  |
|           | 3.       | **                        | **    | **    | **    | **    | **    | **    | **    |
|           | Avg      | 0,85                      | 80,54 | 77,18 | 61,46 | 43,29 | 11,11 | 7,92  | 6,66  |
|           | SD       | 0,88                      | 7,59  | 7,57  | 1,12  | 1,56  | 0,43  | 5,52  | 1,12  |
| dU+1      | 1.       | 0,14                      | 81,04 | 83,48 | 70,53 | 53,36 | 28,74 | 13,73 | 7,18  |
|           | 2.       | 0,86                      | 76,30 | 76,87 | 65,84 | 49,70 | 29,18 | 14,58 | 5,76  |
|           | 3.       | **                        | **    | **    | **    | **    | **    | **    | **    |
|           | Avg      | 0,50                      | 78,67 | 80,17 | 68,18 | 51,53 | 28,96 | 14,16 | 6,47  |
|           | SD       | 0,51                      | 3,35  | 4,67  | 3,32  | 2,59  | 0,31  | 0,60  | 1,00  |
| dU+4      | 1.       | 0,49                      | 56,07 | 76,66 | 71,32 | 8,68* | 27,68 | 15,03 | 11,98 |
|           | 2.       | 0,31                      | 50,01 | 81,50 | 67,04 | 53,48 | 34,27 | 22,42 | 16,23 |
|           | 3.       | **                        | **    | **    | **    | **    | **    | **    | **    |
|           | Avg      | 0,40                      | 53,04 | 79,08 | 69,18 | 53,48 | 30,97 | 18,72 | 14,11 |
|           | SD       | 0,12                      | 4,28  | 3,42  | 3,02  | 0,00  | 4,66  | 5,22  | 3,01  |

| BJ / ScdA |          | Time [min]              |       |       |       |       |       |       |       |
|-----------|----------|-------------------------|-------|-------|-------|-------|-------|-------|-------|
|           |          | 0                       | 1     | 5     | 15    | 30    | 60    | 90    | 120   |
| Strand    | Data set | Polymerase activity [%] |       |       |       |       |       |       |       |
| dU0       | 1.       | 0,00                    | 1,77  | 2,45  | 3,39  | 4,12  | 4,15  | 3,28  | 4,48  |
|           | 2.       | 5,17                    | 2,89  | 3,94  | 6,89  | 6,14  | 5,57  | 7,13  | 6,49  |
|           | 3.       | 1,16                    | 8,36  | 8,39  | 7,80  | 8,64  | 6,78  | 8,28  | 2,86  |
|           | Avg      | 2,11                    | 4,34  | 4,93  | 6,03  | 6,30  | 5,50  | 6,23  | 4,61  |
|           | SD       | 2,71                    | 3,52  | 3,09  | 2,33  | 2,26  | 1,31  | 2,62  | 1,82  |
| dU-1      | 1.       | 0,25                    | 3,52  | 19,07 | 44,70 | 59,15 | 72,71 | 73,58 | 83,36 |
|           | 2.       | 0,84                    | 7,58  | 25,30 | 39,43 | 43,52 | 54,72 | 67,92 | 66,63 |
|           | 3.       | **                      | **    | **    | **    | **    | **    | **    | **    |
|           | Avg      | 0,55                    | 5,55  | 22,18 | 42,06 | 51,33 | 63,71 | 70,75 | 74,99 |
|           | SD       | 0,42                    | 2,87  | 4,41  | 3,72  | 11,05 | 12,72 | 4,00  | 11,82 |
| dU-4      | 1.       | 0,00                    | 8,30  | 14,22 | 35,03 | 53,79 | 71,08 | 86,67 | 91,82 |
|           | 2.       | 2,27                    | 10,28 | 17,16 | 35,74 | 55,27 | 87,19 | 94,24 | 90,82 |
|           | 3.       | **                      | **    | **    | **    | **    | **    | **    | **    |
|           | Avg      | 1,13                    | 9,29  | 15,69 | 35,39 | 54,53 | 79,14 | 90,46 | 91,32 |
|           | SD       | 1,60                    | 1,40  | 2,08  | 0,50  | 1,05  | 11,40 | 5,35  | 0,71  |
| dU+1      | 1.       | 0,90                    | 2,80  | 1,99  | 2,26  | 1,42  | 0,95  | 0,60  | 0,32  |

|      |     |      |      |      |       |       |       |       |       |
|------|-----|------|------|------|-------|-------|-------|-------|-------|
|      | 2.  | 0,97 | 1,83 | 2,14 | 2,03  | 0,85  | 0,35  | 0,23  | 0,96  |
|      | 3.  | **   | **   | **   | **    | **    | **    | **    | **    |
|      | Avg | 0,93 | 2,32 | 2,07 | 2,15  | 1,14  | 0,65  | 0,41  | 0,64  |
|      | SD  | 0,05 | 0,68 | 0,10 | 0,17  | 0,40  | 0,42  | 0,26  | 0,45  |
| dU+4 | 1.  | 2,93 | 4,03 | 5,17 | 13,79 | 11,17 | 22,47 | 21,93 | 24,22 |
|      | 2.  | 0,96 | 2,44 | 6,44 | 13,98 | 15,77 | 20,84 | 20,49 | 22,65 |
|      | 3.  | **   | **   | **   | **    | **    | **    | **    | **    |
|      | Avg | 1,94 | 3,23 | 5,81 | 13,89 | 13,47 | 21,65 | 21,21 | 23,43 |
|      | SD  | 1,39 | 1,12 | 0,90 | 0,14  | 3,25  | 1,15  | 1,02  | 1,11  |

| BJ / ScdA |          | Time [min]               |       |       |       |       |       |       |       |
|-----------|----------|--------------------------|-------|-------|-------|-------|-------|-------|-------|
|           |          | 0                        | 1     | 5     | 15    | 30    | 60    | 90    | 120   |
| Strand    | Data set | Exonuclease activity [%] |       |       |       |       |       |       |       |
| dU0       | 1.       | 0,00                     | 8,97  | 14,06 | 18,99 | 24,02 | 27,68 | 26,42 | 23,45 |
|           | 2.       | 0,00                     | 18,70 | 22,37 | 28,40 | 32,33 | 34,56 | 32,96 | 32,61 |
|           | 3.       | 0,09                     | 22,87 | 31,34 | 32,31 | 35,71 | 38,43 | 36,07 | 35,38 |
|           | Avg      | 0,03                     | 16,84 | 22,59 | 26,56 | 30,69 | 33,56 | 31,82 | 30,48 |
|           | SD       | 0,05                     | 7,13  | 8,64  | 6,84  | 6,01  | 5,44  | 4,93  | 6,24  |
| dU-1      | 1.       | 0,00                     | 7,69  | 9,35  | 7,58  | 8,40  | 5,29  | 5,72  | 1,91  |
|           | 2.       | 0,00                     | 6,99  | 12,88 | 15,38 | 20,01 | 14,37 | 8,44  | 8,73  |
|           | 3.       | **                       | **    | **    | **    | **    | **    | **    | **    |
|           | Avg      | 0,00                     | 7,34  | 11,11 | 11,48 | 14,20 | 9,83  | 7,08  | 5,32  |
|           | SD       | 0,00                     | 0,50  | 2,50  | 5,52  | 8,21  | 6,42  | 1,92  | 4,82  |
| dU-4      | 1.       | 0,00                     | 1,14  | 2,03  | 2,02  | 0,86  | 0,00  | 0,00  | 0,00  |
|           | 2.       | 0,28                     | 7,11  | 9,33  | 2,65  | 1,62  | 0,76  | 0,42  | 0,06  |
|           | 3.       | **                       | **    | **    | **    | **    | **    | **    | **    |
|           | Avg      | 0,14                     | 4,12  | 5,68  | 2,33  | 1,24  | 0,38  | 0,21  | 0,03  |
|           | SD       | 0,20                     | 4,22  | 5,17  | 0,44  | 0,54  | 0,54  | 0,29  | 0,04  |
| dU+1      | 1.       | 0,00                     | 0,91  | 8,79  | 24,45 | 44,09 | 69,55 | 84,97 | 91,45 |
|           | 2.       | 0,00                     | 11,59 | 16,57 | 30,37 | 48,61 | 70,04 | 84,69 | 60,40 |
|           | 3.       | **                       | **    | **    | **    | **    | **    | **    | **    |
|           | Avg      | 0,00                     | 6,25  | 12,68 | 27,41 | 46,35 | 69,79 | 84,83 | 75,92 |
|           | SD       | 0,00                     | 7,55  | 5,50  | 4,18  | 3,19  | 0,34  | 0,20  | 21,95 |
| dU+4      | 1.       | 0,00                     | 2,68  | 4,45  | 11,87 | 12,05 | 46,64 | 59,78 | 59,39 |
|           | 2.       | 0,00                     | 0,57  | 5,94  | 16,33 | 26,91 | 40,73 | 51,95 | 50,21 |
|           | 3.       | **                       | **    | **    | **    | **    | **    | **    | **    |
|           | Avg      | 0,00                     | 1,62  | 5,19  | 14,10 | 19,48 | 43,69 | 55,87 | 54,80 |
|           | SD       | 0,00                     | 1,49  | 1,05  | 3,16  | 10,51 | 4,18  | 5,54  | 6,49  |

**Table S9.** BJ - RcdA. Raw numerical data of densitometry obtained from Quantity One software. \* rejected values.

| BJ / RcdA |          | Time [min]                |        |       |       |       |       |       |       |
|-----------|----------|---------------------------|--------|-------|-------|-------|-------|-------|-------|
|           |          | 0                         | 1      | 5     | 15    | 30    | 60    | 90    | 120   |
| Strand    | Data set | Endonuclease activity [%] |        |       |       |       |       |       |       |
| dU0       | 1.       | 0,56                      | 77,63  | 72,38 | 67,39 | 60,48 | 60,06 | 63,86 | 65,59 |
|           | 2.       | 0,37                      | 89,00  | 84,93 | 77,88 | 70,97 | 69,55 | 67,17 | 66,51 |
|           | 3.       | 0,25                      | 77,19  | 78,91 | 70,46 | 72,99 | 68,81 | 68,32 | 72,29 |
|           | Avg      | 0,39                      | 81,27  | 78,74 | 71,91 | 68,15 | 66,14 | 66,45 | 68,13 |
|           | SD       | 0,16                      | 6,70   | 6,28  | 5,39  | 6,72  | 5,28  | 2,32  | 3,63  |
| dU-1      | 1.       | 0,28                      | 69,62  | 58,90 | 48,20 | 33,04 | 25,69 | 21,25 | 18,72 |
|           | 2.       | 0,41                      | 66,00  | 59,77 | 54,08 | 43,00 | 34,20 | 30,28 | 35,03 |
|           | 3.       | 0,54                      | 68,22  | 59,01 | 48,05 | 38,02 | 29,97 | 27,70 | 25,33 |
|           | Avg      | 0,41                      | 67,95  | 59,22 | 50,11 | 38,02 | 29,95 | 26,41 | 26,36 |
|           | SD       | 0,13                      | 1,82   | 0,47  | 3,44  | 4,98  | 4,25  | 4,65  | 8,21  |
| dU-4      | 1.       | 0,00                      | 82,27  | 62,31 | 56,94 | 53,09 | 38,21 | 17,81 | 8,58  |
|           | 2.       | 2,49                      | 89,11  | 83,24 | 56,19 | 24,74 | 14,08 | 3,55  | 5,90  |
|           | 3.       | 5,80                      | 85,44  | 82,95 | 64,18 | 37,46 | 11,27 | 9,38  | 10,72 |
|           | Avg      | 2,76                      | 85,61  | 76,17 | 59,10 | 38,43 | 21,19 | 10,25 | 8,40  |
|           | SD       | 2,91                      | 3,42   | 12,00 | 4,41  | 14,20 | 14,81 | 7,17  | 2,41  |
| dU+1      | 1.       | 0,68                      | 79,72  | 77,63 | 65,63 | 59,92 | 36,50 | 20,98 | 11,27 |
|           | 2.       | 0,56                      | 73,12  | 72,09 | 57,08 | 54,90 | 32,81 | 22,69 | 12,84 |
|           | 3.       | 0,59                      | 78,38  | 72,64 | 59,56 | 46,54 | 34,55 | 22,57 | 12,05 |
|           | Avg      | 0,61                      | 77,07  | 74,12 | 60,75 | 53,79 | 34,62 | 22,08 | 12,05 |
|           | SD       | 0,06                      | 3,49   | 3,05  | 4,40  | 6,76  | 1,84  | 0,95  | 0,79  |
| dU+4      | 1.       | 3,02                      | 4,62*  | 4,58* | 6,60* | 37,10 | 39,81 | 36,13 | 34,29 |
|           | 2.       | 0,85                      | 66,97  | 72,19 | 60,99 | 45,74 | 25,52 | 15,34 | 10,91 |
|           | 3.       | 1,09                      | 68,17  | 69,61 | 56,24 | 39,81 | 25,64 | 13,88 | 9,53  |
|           | Avg      | 1,65                      | 67,570 | 70,90 | 58,61 | 40,88 | 30,33 | 21,79 | 18,24 |
|           | SD       | 1,19                      | 0,85   | 1,83  | 3,36  | 4,42  | 8,21  | 12,45 | 13,92 |

| BJ / RcdA |          | Time [min]              |       |       |       |        |       |       |       |
|-----------|----------|-------------------------|-------|-------|-------|--------|-------|-------|-------|
|           |          | 0                       | 1     | 5     | 15    | 30     | 60    | 90    | 120   |
| Strand    | Data set | Polymerase activity [%] |       |       |       |        |       |       |       |
| dU0       | 1.       | 2,04                    | 1,74  | 3,92  | 3,83  | 5,25   | 7,09  | 4,84  | 3,31  |
|           | 2.       | 2,41                    | 1,85  | 1,61  | 3,89  | 6,07   | 5,27  | 5,44  | 3,56  |
|           | 3.       | 0,59                    | 2,87  | 5,89  | 8,20  | 4,93   | 7,51  | 6,35  | 6,85  |
|           | Avg      | 1,68                    | 2,15  | 3,81  | 5,31  | 5,41   | 6,62  | 5,55  | 4,57  |
|           | SD       | 0,96                    | 0,62  | 2,14  | 2,51  | 0,59   | 1,19  | 0,76  | 1,97  |
| dU-1      | 1.       | 0,77                    | 14,06 | 23,89 | 35,60 | 54,72  | 63,36 | 70,53 | 75,03 |
|           | 2.       | 1,28                    | 15,93 | 20,63 | 30,10 | 44,65  | 56,80 | 62,50 | 60,42 |
|           | 3.       | 0,94                    | 14,93 | 25,32 | 37,81 | 50,90  | 60,69 | 64,67 | 67,26 |
|           | Avg      | 1,00                    | 14,97 | 23,28 | 34,50 | 50,09  | 60,28 | 65,90 | 67,57 |
|           | SD       | 0,26                    | 0,93  | 2,40  | 3,97  | 5,09   | 3,30  | 4,15  | 7,31  |
| dU-4      | 1.       | 3,09                    | 12,40 | 32,26 | 37,35 | 43,62  | 59,91 | 80,59 | 89,53 |
|           | 2.       | 3,01                    | 5,57  | 5,01* | 39,97 | 72,15  | 83,05 | 93,62 | 91,48 |
|           | 3.       | 6,11                    | 7,91  | 10,00 | 32,09 | 59,64  | 86,95 | 89,17 | 87,69 |
|           | Avg      | 4,07                    | 8,63  | 21,13 | 36,47 | 58,471 | 76,64 | 87,80 | 89,56 |
|           | SD       | 1,77                    | 3,47  | 15,74 | 4,01  | 14,30  | 14,62 | 6,62  | 1,89  |
| dU+1      | 1.       | 2,32                    | 4,67  | 4,60  | 2,32  | 2,49   | 0,45  | 0,24  | 0,07  |

|      |     |      |       |       |       |       |       |       |       |
|------|-----|------|-------|-------|-------|-------|-------|-------|-------|
|      | 2.  | 1,51 | 5,74  | 7,53  | 3,98  | 2,34  | 0,65  | 0,92  | 0,41  |
|      | 3.  | 2,75 | 5,22  | 4,01  | 2,83  | 1,15  | 0,89  | 0,67  | 0,57  |
|      | Avg | 2,19 | 5,21  | 5,38  | 3,04  | 1,99  | 0,66  | 0,61  | 0,35  |
|      | SD  | 0,63 | 0,53  | 1,88  | 0,85  | 0,73  | 0,22  | 0,34  | 0,25  |
| dU+4 | 1.  | 7,05 | 8,86  | 8,45  | 9,08  | 14,25 | 12,38 | 10,97 | 13,87 |
|      | 2.  | 4,18 | 11,22 | 15,84 | 22,54 | 31,30 | 37,56 | 39,92 | 44,23 |
|      | 3.  | 5,15 | 9,01  | 15,77 | 20,92 | 26,96 | 30,83 | 31,46 | 34,10 |
|      | Avg | 5,46 | 9,70  | 13,35 | 17,51 | 24,17 | 26,92 | 27,45 | 30,73 |
|      | SD  | 1,46 | 1,32  | 4,24  | 7,35  | 8,87  | 13,03 | 14,89 | 15,46 |

| BJ / RcdA |          | Time [min]               |       |       |       |       |       |       |       |
|-----------|----------|--------------------------|-------|-------|-------|-------|-------|-------|-------|
|           |          | 0                        | 1     | 5     | 15    | 30    | 60    | 90    | 120   |
| Strand    | Data set | Exonuclease activity [%] |       |       |       |       |       |       |       |
| dU0       | 1.       | 0,15                     | 20,04 | 23,36 | 28,78 | 34,22 | 32,82 | 31,27 | 30,94 |
|           | 2.       | 0,00                     | 8,24  | 13,27 | 18,20 | 22,82 | 25,03 | 27,07 | 29,08 |
|           | 3.       | 0,04                     | 11,38 | 15,04 | 21,26 | 22,02 | 23,62 | 25,22 | 20,73 |
|           | Avg      | 0,06                     | 13,22 | 17,22 | 22,74 | 26,35 | 27,16 | 27,86 | 26,92 |
|           | SD       | 0,07                     | 6,11  | 5,39  | 5,45  | 6,82  | 4,95  | 3,10  | 5,44  |
| dU-1      | 1.       | 0,00                     | 13,07 | 16,74 | 15,98 | 12,04 | 10,77 | 8,02  | 5,78  |
|           | 2.       | 0,15                     | 15,23 | 18,28 | 15,53 | 12,16 | 8,73  | 6,82  | 3,91  |
|           | 3.       | 0,14                     | 12,97 | 13,72 | 13,58 | 10,66 | 8,88  | 7,10  | 6,75  |
|           | Avg      | 0,10                     | 13,76 | 16,24 | 15,03 | 11,62 | 9,46  | 7,32  | 5,48  |
|           | SD       | 0,08                     | 1,27  | 2,32  | 1,27  | 0,83  | 1,13  | 0,63  | 1,44  |
| dU-4      | 1.       | 0,00                     | 3,32  | 4,17  | 3,89  | 2,76  | 0,52  | 0,00  | 0,00  |
|           | 2.       | 0,83                     | 3,58  | 11,29 | 3,20  | 1,41  | 0,67  | 0,16  | 0,09  |
|           | 3.       | 1,44                     | 5,37  | 6,55  | 3,43  | 2,55  | 1,00  | 0,48  | 0,27  |
|           | Avg      | 0,76                     | 4,09  | 7,34  | 3,51  | 2,24  | 0,73  | 0,21  | 0,12  |
|           | SD       | 0,72                     | 1,12  | 3,63  | 0,35  | 0,72  | 0,24  | 0,25  | 0,14  |
| dU+1      | 1.       | 0,00                     | 12,45 | 16,33 | 31,25 | 28,56 | 62,68 | 78,53 | 88,42 |
|           | 2.       | 0,15                     | 18,92 | 19,65 | 38,45 | 42,51 | 66,32 | 76,12 | 86,55 |
|           | 3.       | 0,21                     | 14,51 | 22,15 | 36,82 | 51,81 | 64,15 | 76,44 | 87,09 |
|           | Avg      | 0,12                     | 15,29 | 19,38 | 35,51 | 40,96 | 64,38 | 77,03 | 87,35 |
|           | SD       | 0,11                     | 3,31  | 2,92  | 3,78  | 11,70 | 1,83  | 1,31  | 0,97  |
| dU+4      | 1.       | 0,12                     | 0,50* | 0,59* | 1,06* | 26,07 | 46,86 | 52,54 | 51,24 |
|           | 2.       | 0,20                     | 1,97  | 6,85  | 14,89 | 20,91 | 33,79 | 40,89 | 40,86 |
|           | 3.       | 0,55                     | 6,30  | 10,28 | 20,75 | 30,68 | 40,79 | 51,94 | 52,76 |
|           | Avg      | 0,29                     | 4,14  | 8,57  | 17,82 | 25,89 | 40,48 | 48,46 | 48,29 |
|           | SD       | 0,23                     | 3,06  | 2,42  | 4,14  | 4,89  | 6,54  | 6,56  | 6,48  |

**Table S10.** XPC - ScdA. Raw numerical data of densitometry obtained from Quantity One software. \* rejected values.

| XPC / ScdA |          | Time [min]                |        |       |       |       |       |       |       |
|------------|----------|---------------------------|--------|-------|-------|-------|-------|-------|-------|
|            |          | 0                         | 1      | 5     | 15    | 30    | 60    | 90    | 120   |
| Strand     | Data set | Endonuclease activity [%] |        |       |       |       |       |       |       |
| dU0        | 1.       | 0,20                      | 69,78  | 66,83 | 61,13 | 54,39 | 49,94 | 53,49 | 56,75 |
|            | 2.       | 0,91                      | 75,22  | 69,48 | 60,91 | 60,50 | 57,54 | 59,56 | 59,62 |
|            | 3.       | 1,01                      | 70,81  | 66,00 | 61,21 | 53,36 | 56,94 | 57,29 | 57,72 |
|            | Avg      | 0,71                      | 71,94  | 67,43 | 61,09 | 56,08 | 54,81 | 56,78 | 58,03 |
|            | SD       | 0,44                      | 2,89   | 1,82  | 0,16  | 3,86  | 4,23  | 3,07  | 1,46  |
| dU-1       | 1.       | 0,16                      | 41,25  | 52,10 | 44,45 | 38,49 | 35,87 | 35,27 | 28,64 |
|            | 2.       | 0,18                      | 61,42  | 58,36 | 44,75 | 35,23 | 29,25 | 31,77 | 28,01 |
|            | 3.       | 0,61                      | 71,84  | 65,65 | 47,68 | 30,14 | 23,81 | 18,65 | 20,22 |
|            | Avg      | 0,32                      | 58,17  | 58,70 | 45,63 | 34,62 | 29,65 | 28,56 | 25,62 |
|            | SD       | 0,25                      | 15,55  | 6,78  | 1,79  | 4,21  | 6,04  | 8,76  | 4,69  |
| dU-4       | 1.       | 21,85                     | 92,97  | 96,06 | 95,36 | 31,90 | 15,71 | 14,10 | 12,00 |
|            | 2.       | 11,43                     | 88,18  | 88,35 | 85,04 | 13,42 | 6,08  | 3,73  | 8,80  |
|            | 3.       | 5,02                      | 76,53  | 75,05 | 70,08 | 33,18 | 12,38 | 6,65  | 5,45  |
|            | Avg      | 12,77                     | 85,89  | 86,49 | 83,49 | 26,17 | 11,39 | 8,16  | 8,75  |
|            | SD       | 8,49                      | 8,45   | 10,63 | 12,71 | 11,05 | 4,89  | 5,35  | 3,27  |
| dU+1       | 1.       | 0,86                      | 70,50  | 65,13 | 56,96 | 30,78 | 18,90 | 8,12  | 3,94  |
|            | 2.       | 2,02                      | 61,05  | 60,54 | 50,49 | 35,03 | 16,62 | 11,24 | 5,11  |
|            | 3.       | 3,09                      | 78,17  | 75,88 | 63,88 | 38,38 | 13,95 | 6,58  | 3,41  |
|            | Avg      | 1,99                      | 69,91  | 67,19 | 57,11 | 34,73 | 16,49 | 8,64  | 4,16  |
|            | SD       | 1,12                      | 8,57   | 7,87  | 6,70  | 3,81  | 2,48  | 2,38  | 0,87  |
| dU+4       | 1.       | 2,07                      | 63,59  | 70,35 | 65,14 | 44,72 | 23,07 | 11,10 | 5,74  |
|            | 2.       | 2,27                      | 53,74  | 58,25 | 50,63 | 39,93 | 23,88 | 17,78 | 12,78 |
|            | 3.       | 3,37                      | 82,34  | 74,55 | 62,33 | 39,84 | 8,28  | 8,03  | 5,90  |
|            | Avg      | 2,57                      | 66,561 | 67,72 | 59,37 | 41,50 | 18,41 | 12,30 | 8,14  |
|            | SD       | 0,70                      | 14,53  | 8,46  | 7,69  | 2,79  | 8,78  | 4,98  | 4,02  |

| XPC / ScdA |          | Time [min]              |       |       |       |       |       |       |       |
|------------|----------|-------------------------|-------|-------|-------|-------|-------|-------|-------|
|            |          | 0                       | 1     | 5     | 15    | 30    | 60    | 90    | 120   |
| Strand     | Data set | Polymerase activity [%] |       |       |       |       |       |       |       |
| dU0        | 1.       | 2,61                    | 8,57  | 10,36 | 7,13  | 5,62  | 5,60  | 5,12  | 4,36  |
|            | 2.       | 9,18                    | 6,00  | 7,37  | 7,19  | 4,14  | 4,31  | 3,30  | 3,21  |
|            | 3.       | 5,98                    | 9,15  | 10,87 | 9,92  | 6,08  | 6,44  | 4,83  | 4,62  |
|            | Avg      | 5,92                    | 7,91  | 9,53  | 8,08  | 5,28  | 5,45  | 4,42  | 4,06  |
|            | SD       | 3,28                    | 1,68  | 1,89  | 1,59  | 1,01  | 1,07  | 0,98  | 0,75  |
| dU-1       | 1.       | 1,51                    | 9,16  | 23,42 | 34,32 | 47,97 | 51,59 | 52,75 | 62,42 |
|            | 2.       | 1,98                    | 11,45 | 23,38 | 33,47 | 47,58 | 58,17 | 54,16 | 58,28 |
|            | 3.       | 1,74                    | 8,76  | 18,16 | 36,15 | 59,96 | 69,37 | 72,70 | 68,06 |
|            | Avg      | 1,74                    | 9,79  | 21,65 | 34,64 | 51,84 | 59,71 | 59,87 | 62,92 |
|            | SD       | 0,23                    | 1,45  | 3,02  | 1,37  | 7,04  | 8,99  | 11,13 | 4,91  |
| dU-4       | 1.       | 2,33                    | 0,10  | 0,17  | 1,72  | 66,19 | 81,01 | 83,98 | 86,05 |
|            | 2.       | 10,00*                  | 2,94  | 3,35  | 4,66  | 83,50 | 91,59 | 93,80 | 89,02 |
|            | 3.       | 7,62                    | 8,40  | 12,94 | 23,53 | 65,26 | 85,73 | 90,92 | 92,18 |
|            | Avg      | 4,98                    | 3,81  | 5,48  | 9,97  | 71,65 | 86,11 | 89,57 | 89,08 |
|            | SD       | 3,74                    | 4,22  | 6,65  | 11,83 | 10,27 | 5,30  | 5,05  | 3,06  |
| dU+1       | 1.       | 2,52                    | 6,45  | 4,73  | 3,10  | 0,80  | 0,62  | 0,60  | 0,77  |

|      |     |       |       |       |       |       |       |       |       |
|------|-----|-------|-------|-------|-------|-------|-------|-------|-------|
|      | 2.  | 3,38  | 9,83  | 8,37  | 5,55  | 2,44  | 0,43  | 0,34  | 0,20  |
|      | 3.  | 9,84  | 8,00  | 7,04  | 4,15  | 2,16  | 0,97  | 0,68  | 0,58  |
|      | Avg | 5,25  | 8,09  | 6,71  | 4,27  | 1,80  | 0,67  | 0,54  | 0,52  |
|      | SD  | 4,00  | 1,69  | 1,84  | 1,23  | 0,88  | 0,27  | 0,18  | 0,29  |
| dU+4 | 1.  | 3,71  | 7,46  | 10,47 | 12,75 | 14,49 | 13,26 | 12,02 | 10,97 |
|      | 2.  | 0,00* | 0,02* | 9,95  | 20,50 | 18,03 | 13,38 | 12,58 | 10,65 |
|      | 3.  | 19,32 | 6,04  | 12,41 | 16,09 | 15,00 | 7,10  | 18,16 | 18,45 |
|      | Avg | 11,52 | 6,75  | 10,94 | 16,44 | 15,84 | 11,25 | 14,25 | 13,36 |
|      | SD  | 11,04 | 1,00  | 1,30  | 3,88  | 1,91  | 3,59  | 3,40  | 4,41  |

| XPC / ScdA |          | Time [min]               |       |       |       |       |       |       |       |
|------------|----------|--------------------------|-------|-------|-------|-------|-------|-------|-------|
|            |          | 0                        | 1     | 5     | 15    | 30    | 60    | 90    | 120   |
| Strand     | Data set | Exonuclease activity [%] |       |       |       |       |       |       |       |
| dU0        | 1.       | 0,02                     | 19,01 | 21,95 | 31,68 | 39,98 | 44,46 | 41,38 | 38,89 |
|            | 2.       | 0,07                     | 15,33 | 22,46 | 31,51 | 35,04 | 37,81 | 36,89 | 36,98 |
|            | 3.       | 0,47                     | 10,59 | 19,05 | 27,63 | 39,38 | 35,98 | 37,29 | 36,90 |
|            | Avg      | 0,19                     | 14,98 | 21,15 | 30,27 | 38,13 | 39,42 | 38,52 | 37,59 |
|            | SD       | 0,25                     | 4,22  | 1,84  | 2,29  | 2,70  | 4,47  | 2,49  | 1,13  |
| dU-1       | 1.       | 0,04                     | 6,38  | 20,73 | 20,44 | 12,92 | 11,99 | 11,37 | 8,30  |
|            | 2.       | 0,01                     | 14,21 | 14,97 | 20,61 | 15,92 | 11,05 | 12,54 | 11,74 |
|            | 3.       | 0,14                     | 13,75 | 13,70 | 14,16 | 7,57  | 5,19  | 5,13  | 8,09  |
|            | Avg      | 0,06                     | 11,45 | 16,47 | 18,41 | 12,14 | 9,41  | 9,68  | 9,38  |
|            | SD       | 0,07                     | 4,40  | 3,75  | 3,68  | 4,23  | 3,69  | 3,99  | 2,05  |
| dU-4       | 1.       | 1,01                     | 3,35  | 3,21  | 2,66  | 1,13  | 0,18  | 0,06  | 0,07  |
|            | 2.       | 0,99                     | 6,30  | 7,30  | 9,67  | 1,95  | 0,37  | 0,00  | 0,00  |
|            | 3.       | 2,61                     | 12,80 | 11,18 | 6,02  | 0,56  | 0,04  | 0,09  | 0,00  |
|            | Avg      | 1,54                     | 7,48  | 7,23  | 6,12  | 1,21  | 0,20  | 0,05  | 0,02  |
|            | SD       | 0,93                     | 4,83  | 3,98  | 3,50  | 0,70  | 0,17  | 0,05  | 0,04  |
| dU+1       | 1.       | 0,30                     | 13,27 | 26,25 | 38,93 | 67,95 | 80,14 | 90,95 | 94,81 |
|            | 2.       | 0,10                     | 11,26 | 24,42 | 42,37 | 62,02 | 82,72 | 88,34 | 94,36 |
|            | 3.       | 1,72                     | 7,67  | 14,90 | 30,81 | 58,86 | 84,72 | 92,39 | 95,67 |
|            | Avg      | 0,71                     | 10,73 | 21,86 | 37,37 | 62,94 | 82,53 | 90,56 | 94,95 |
|            | SD       | 0,88                     | 2,84  | 6,10  | 5,94  | 4,61  | 2,30  | 2,05  | 0,67  |
| dU+4       | 1.       | 0,67                     | 3,73  | 11,17 | 20,46 | 38,70 | 61,39 | 74,27 | 79,50 |
|            | 2.       | 0,09                     | 6,68  | 13,28 | 24,79 | 37,36 | 58,64 | 65,98 | 72,39 |
|            | 3.       | 1,13                     | 9,51  | 7,35  | 19,39 | 40,22 | 76,77 | 68,50 | 71,34 |
|            | Avg      | 0,63                     | 6,64  | 10,60 | 21,55 | 38,76 | 65,60 | 69,58 | 74,41 |
|            | SD       | 0,52                     | 2,89  | 3,01  | 2,86  | 1,43  | 9,77  | 4,25  | 4,44  |

**Table S11.** XPC - RcdA. Raw numerical data of densitometry obtained from Quantity One software. \* rejected values.

| XPC / RcdA |          | Time [min]                |       |       |        |        |        |        |        |
|------------|----------|---------------------------|-------|-------|--------|--------|--------|--------|--------|
|            |          | 0                         | 1     | 5     | 15     | 30     | 60     | 90     | 120    |
| Strand     | Data set | Endonuclease activity [%] |       |       |        |        |        |        |        |
| dU0        | 1.       | 1,63                      | 55,15 | 49,25 | 52,23  | 49,63  | 43,79  | 41,24  | 40,28  |
|            | 2.       | 1,61                      | 65,24 | 57,65 | 53,54  | 47,02  | 45,36  | 44,47  | 40,82  |
|            | 3.       | 2,34                      | 62,15 | 53,37 | 54,19  | 54,30  | 46,96  | 47,12  | 46,84  |
|            | Avg      | 1,86                      | 60,85 | 53,42 | 53,32  | 50,32  | 45,37  | 44,28  | 42,65  |
|            | SD       | 0,42                      | 5,17  | 4,20  | 1,00   | 3,69   | 1,58   | 2,95   | 3,64   |
| dU-1       | 1.       | 0,58                      | 46,02 | 67,87 | 38,43  | 34,81  | 28,19  | 27,98  | 29,69  |
|            | 2.       | 1,04                      | 64,54 | 72,60 | 47,67  | 40,33  | 28,86  | 27,32  | 27,08  |
|            | 3.       | 0,99                      | 71,36 | 76,40 | 52,53  | 37,07  | 27,15  | 25,96  | 23,52  |
|            | Avg      | 0,87                      | 60,64 | 72,29 | 46,21  | 37,41  | 28,07  | 27,09  | 26,76  |
|            | SD       | 0,25                      | 13,11 | 4,27  | 7,16   | 2,78   | 0,86   | 1,03   | 3,10   |
| dU-4       | 1.       | 8,40                      | 64,60 | 70,27 | 45,45  | 40,11  | 12,27  | 16,71  | 13,59  |
|            | 2.       | 3,44                      | 79,59 | 87,39 | 83,62* | 84,41* | 86,52* | 87,05* | 84,49* |
|            | 3.       | 3,31                      | 78,74 | 83,15 | 65,10  | 33,76  | 23,59  | 23,00  | 8,58   |
|            | Avg      | 5,05                      | 74,31 | 80,27 | 55,28  | 36,93  | 17,93  | 19,86  | 11,09  |
|            | SD       | 2,91                      | 8,42  | 8,91  | 13,90  | 4,49   | 8,01   | 4,45   | 3,55   |
| dU+1       | 1.       | 3,51                      | 60,57 | 79,40 | 51,45  | 43,33  | 27,95  | 18,15  | 6,76   |
|            | 2.       | 1,46                      | 70,59 | 80,35 | 60,36  | 46,06  | 22,87  | 17,03  | 6,42   |
|            | 3.       | 0,00                      | 80,40 | 92,06 | 65,05  | 51,09  | 1,41*  | 12,41  | 3,07   |
|            | Avg      | 1,65                      | 70,52 | 83,93 | 58,95  | 46,83  | 25,41  | 15,86  | 5,42   |
|            | SD       | 1,76                      | 9,91  | 7,05  | 6,91   | 3,94   | 3,59   | 3,04   | 2,04   |
| dU+4       | 1.       | 3,94                      | 36,99 | 83,13 | 50,32  | 23,65  | 19,04  | 9,66   | 5,66   |
|            | 2.       | 2,23                      | 32,15 | 84,51 | 62,04  | 47,74  | 41,44  | 14,20  | 7,65   |
|            | 3.       | 3,81                      | 46,48 | 92,10 | 64,33  | 51,34  | 4,87*  | 14,55  | 5,79   |
|            | Avg      | 3,33                      | 38,54 | 86,58 | 58,90  | 40,91  | 30,24  | 12,81  | 6,37   |
|            | SD       | 0,95                      | 7,29  | 4,83  | 7,52   | 15,06  | 15,84  | 2,73   | 1,12   |

| XPC / RcdA |          | Time [min]              |       |       |       |       |       |       |       |
|------------|----------|-------------------------|-------|-------|-------|-------|-------|-------|-------|
|            |          | 0                       | 1     | 5     | 15    | 30    | 60    | 90    | 120   |
| Strand     | Data set | Polymerase activity [%] |       |       |       |       |       |       |       |
| dU0        | 1.       | 8,90                    | 8,18  | 7,71  | 9,24  | 6,83  | 6,00  | 3,94  | 2,67  |
|            | 2.       | 10,52                   | 7,29  | 5,58  | 6,79  | 5,44  | 4,60  | 4,22  | 2,24  |
|            | 3.       | 12,83                   | 11,99 | 8,37  | 11,44 | 9,50  | 7,53  | 6,43  | 4,28  |
|            | Avg      | 10,75                   | 9,15  | 7,22  | 9,16  | 7,26  | 6,04  | 4,87  | 3,06  |
|            | SD       | 1,97                    | 2,50  | 1,46  | 2,33  | 2,07  | 1,46  | 1,36  | 1,08  |
| dU-1       | 1.       | 2,68                    | 9,65  | 17,69 | 36,21 | 43,08 | 50,84 | 50,33 | 46,06 |
|            | 2.       | 2,40                    | 6,72  | 16,65 | 33,59 | 38,80 | 51,36 | 44,87 | 51,58 |
|            | 3.       | 3,45                    | 9,86  | 15,30 | 36,21 | 50,12 | 62,75 | 62,96 | 66,04 |
|            | Avg      | 2,85                    | 8,74  | 16,55 | 35,34 | 44,00 | 54,98 | 52,72 | 54,56 |
|            | SD       | 0,55                    | 1,76  | 1,20  | 1,51  | 5,72  | 6,73  | 9,28  | 10,32 |
| dU-4       | 1.       | 15,77                   | 15,89 | 25,31 | 50,71 | 56,93 | 69,38 | 81,13 | 83,24 |
|            | 2.       | 3,12                    | 6,50  | 3,44  | 4,76  | 6,24  | 8,67  | 11,42 | 13,08 |
|            | 3.       | 5,98                    | 9,81  | 8,14  | 29,42 | 62,21 | 74,69 | 75,15 | 89,91 |
|            | Avg      | 8,29                    | 10,73 | 12,30 | 28,30 | 41,80 | 50,91 | 55,90 | 62,08 |
|            | SD       | 6,64                    | 4,76  | 11,51 | 22,99 | 30,90 | 36,68 | 38,64 | 42,56 |
| dU+1       | 1.       | 4,95                    | 8,49  | 3,22  | 5,51  | 2,94  | 1,00  | 0,50  | 0,31  |

|      |     |       |       |      |       |       |       |       |       |
|------|-----|-------|-------|------|-------|-------|-------|-------|-------|
|      | 2.  | 5,85  | 6,38  | 1,75 | 4,20  | 1,62  | 0,69  | 0,65  | 0,33  |
|      | 3.  | 6,11  | 8,17  | 1,19 | 4,96  | 1,72  | 10,53 | 0,00  | 3,23  |
|      | Avg | 5,64  | 7,68  | 2,05 | 4,89  | 2,09  | 4,08  | 0,38  | 1,29  |
|      | SD  | 0,61  | 1,14  | 1,05 | 0,66  | 0,73  | 5,59  | 0,34  | 1,68  |
| dU+4 | 1.  | 16,21 | 11,27 | 6,73 | 25,19 | 40,15 | 27,75 | 31,64 | 26,02 |
|      | 2.  | 11,18 | 13,86 | 8,61 | 18,04 | 21,41 | 21,63 | 29,84 | 30,79 |
|      | 3.  | 25,56 | 19,13 | 6,43 | 17,73 | 21,20 | 26,94 | 31,77 | 34,83 |
|      | Avg | 17,65 | 14,75 | 7,26 | 20,32 | 27,59 | 25,44 | 31,09 | 30,54 |
|      | SD  | 7,30  | 4,01  | 1,18 | 4,22  | 10,88 | 3,33  | 1,08  | 4,41  |

| XPC / RcdA |          | Time [min]               |       |       |       |       |       |       |       |
|------------|----------|--------------------------|-------|-------|-------|-------|-------|-------|-------|
|            |          | 0                        | 1     | 5     | 15    | 30    | 60    | 90    | 120   |
| Strand     | Data set | Exonuclease activity [%] |       |       |       |       |       |       |       |
| dU0        | 1.       | 0,00                     | 26,32 | 41,98 | 38,19 | 43,33 | 50,07 | 54,46 | 56,54 |
|            | 2.       | 0,10                     | 16,14 | 35,56 | 38,30 | 45,93 | 48,60 | 50,12 | 55,07 |
|            | 3.       | 0,17                     | 19,42 | 37,96 | 34,00 | 36,05 | 45,40 | 46,31 | 48,77 |
|            | Avg      | 0,09                     | 20,63 | 38,50 | 36,83 | 41,77 | 48,02 | 50,30 | 53,46 |
|            | SD       | 0,08                     | 5,20  | 3,24  | 2,45  | 5,12  | 2,39  | 4,08  | 4,13  |
| dU-1       | 1.       | 0,23                     | 10,69 | 13,52 | 24,63 | 21,72 | 20,37 | 21,15 | 23,30 |
|            | 2.       | 0,08                     | 12,62 | 10,45 | 17,07 | 20,26 | 19,55 | 27,62 | 21,08 |
|            | 3.       | 0,00                     | 11,21 | 7,86  | 10,96 | 12,54 | 9,78  | 10,65 | 9,77  |
|            | Avg      | 0,10                     | 11,51 | 10,61 | 17,55 | 18,17 | 16,57 | 19,81 | 18,05 |
|            | SD       | 0,12                     | 1,00  | 2,83  | 6,85  | 4,93  | 5,89  | 8,56  | 7,26  |
| dU-4       | 1.       | 6,12                     | 9,76  | 2,89  | 2,92  | 2,15  | 0,48  | 0,30  | 0,22  |
|            | 2.       | 2,33                     | 9,13  | 4,92  | 11,12 | 9,06  | 3,27  | 1,17  | 1,48  |
|            | 3.       | 2,81                     | 7,63  | 7,46  | 5,12  | 2,16  | 0,92  | 1,18  | 0,00  |
|            | Avg      | 3,75                     | 8,84  | 5,09  | 6,39  | 4,46  | 1,56  | 0,89  | 0,57  |
|            | SD       | 2,06                     | 1,09  | 2,29  | 4,25  | 3,98  | 1,50  | 0,50  | 0,80  |
| dU+1       | 1.       | 0,74                     | 13,99 | 16,37 | 41,81 | 52,93 | 70,68 | 81,12 | 92,66 |
|            | 2.       | 0,42                     | 8,78  | 17,17 | 34,09 | 52,07 | 76,25 | 82,21 | 93,13 |
|            | 3.       | 0,00                     | 4,59  | 5,77  | 28,39 | 46,40 | 0,00* | 87,07 | 80,48 |
|            | Avg      | 0,39                     | 9,12  | 13,10 | 34,76 | 50,46 | 73,46 | 83,47 | 88,76 |
|            | SD       | 0,37                     | 4,71  | 6,37  | 6,73  | 3,55  | 3,94  | 3,16  | 7,17  |
| dU+4       | 1.       | 0,84                     | 1,71  | 7,54  | 22,16 | 25,71 | 51,65 | 57,52 | 67,06 |
|            | 2.       | 0,00                     | 1,06  | 5,38  | 17,20 | 29,53 | 32,84 | 55,04 | 60,42 |
|            | 3.       | 0,00                     | 0,00  | 0,00  | 15,55 | 24,47 | 0,00  | 51,42 | 55,67 |
|            | Avg      | 0,28                     | 0,92  | 4,31  | 18,30 | 26,57 | 28,16 | 54,66 | 61,05 |
|            | SD       | 0,49                     | 0,86  | 3,88  | 3,44  | 2,64  | 26,14 | 3,07  | 5,73  |



## Autoradiograms

**1**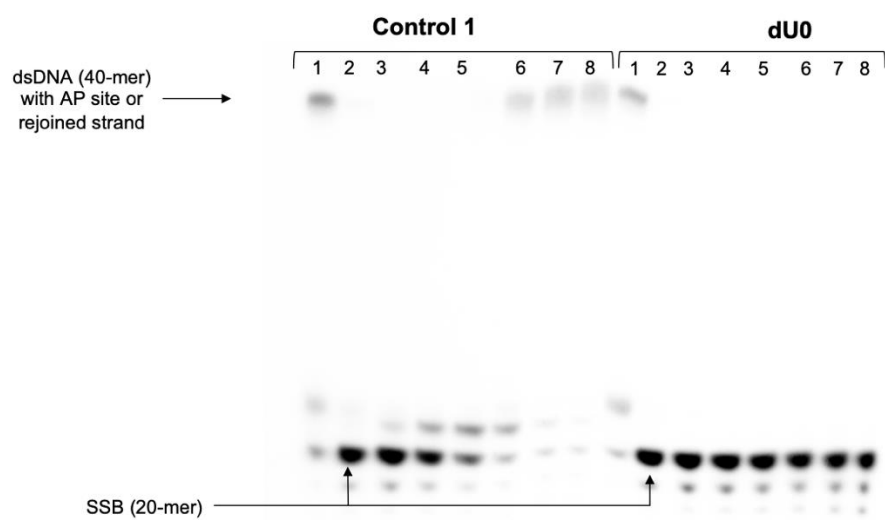**2**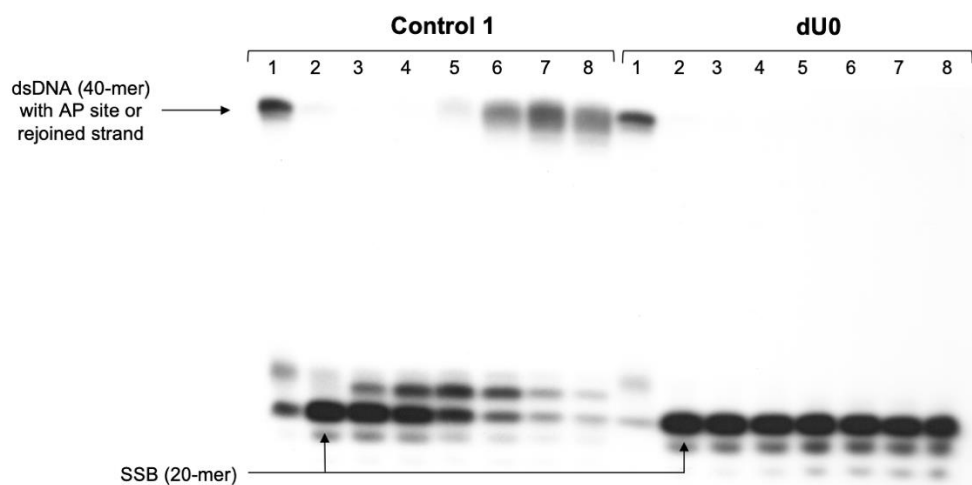**3**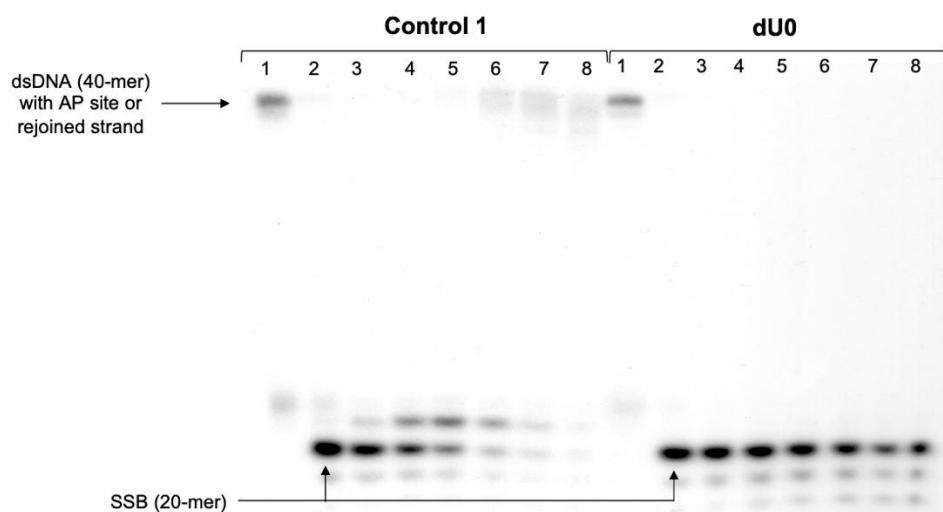

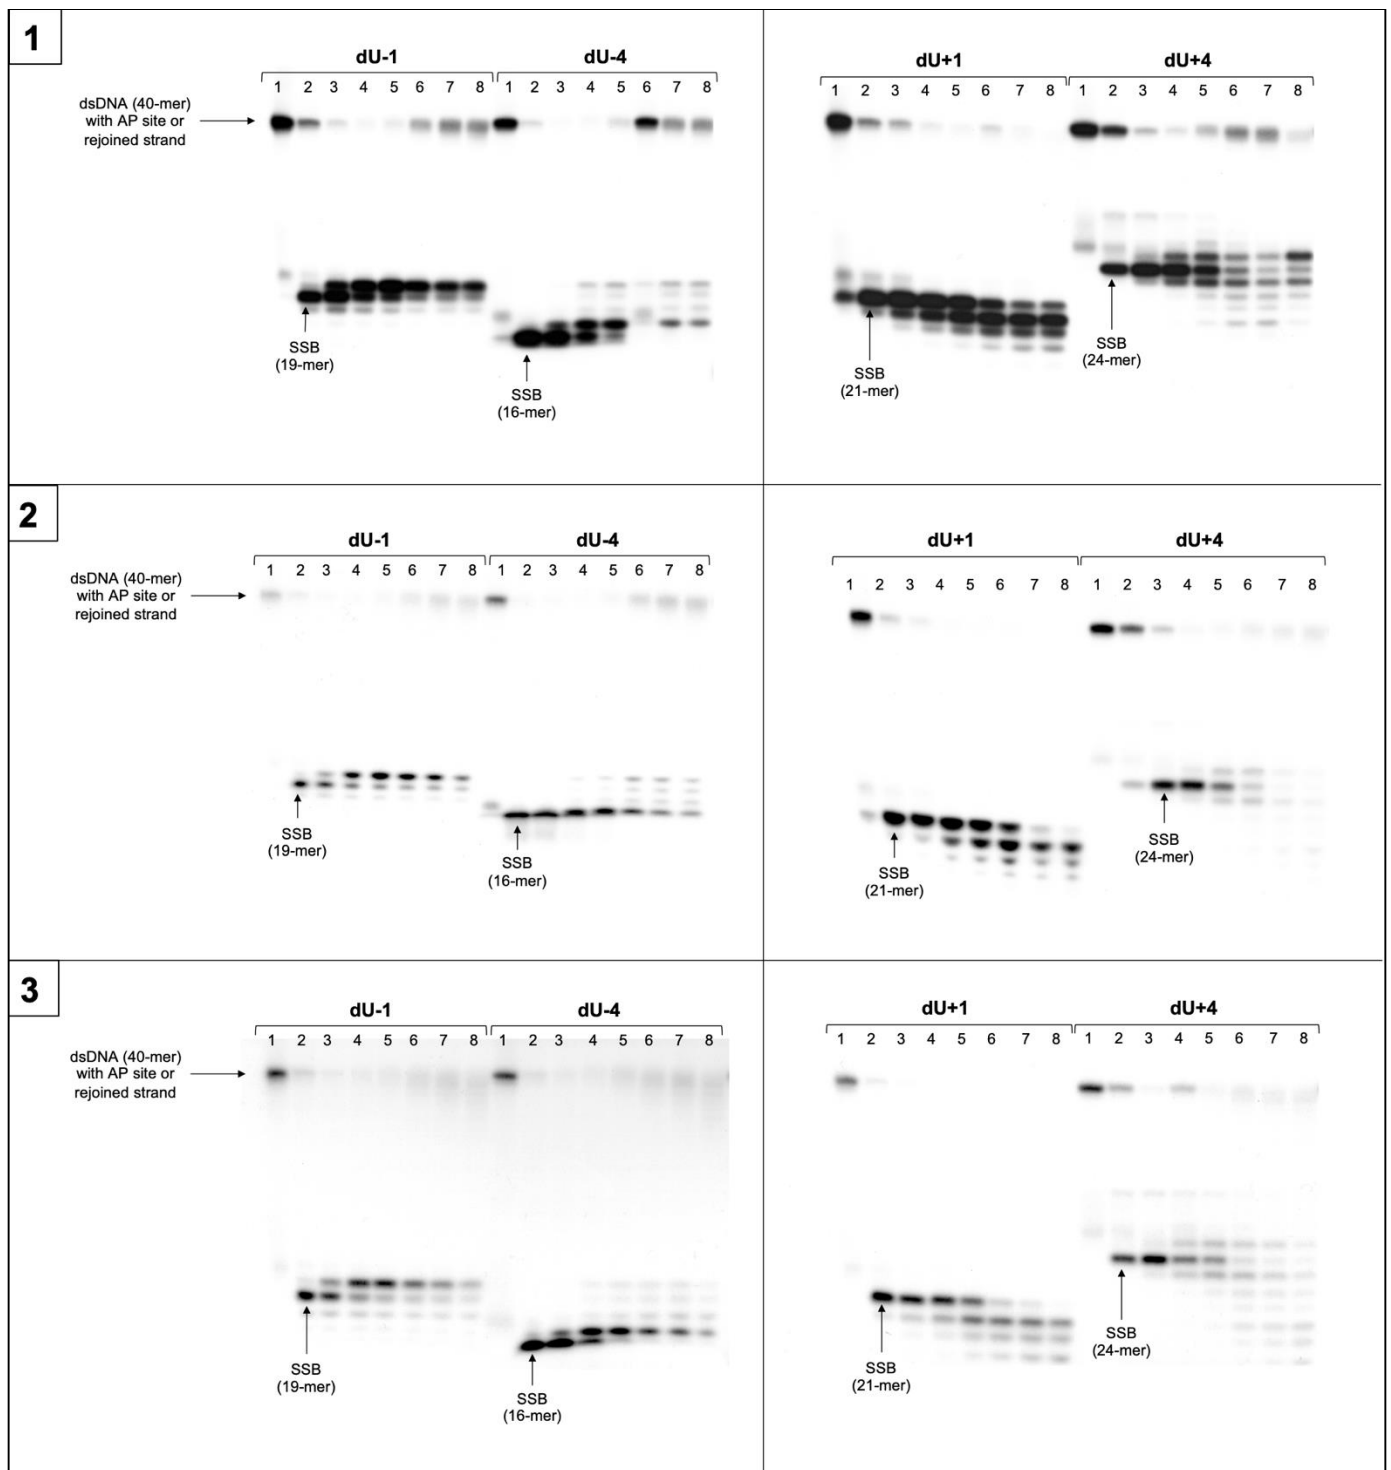

**Figure S4.** The autoradiograms presenting results of Control 1 and ds-CDL containing *ScdA* by *xrs5* Cytoplasmic Extract. Lanes correspond with different assay time: lane 1 - 0 min; lane 2 - 1 min; lane 3 - 5 min; lane 4 - 15 min; lane 5 - 30 min; lane 6 - 60 min; lane 7 - 90 min; lane 8 - 120 min. Three replications of the experiment are shown.

**1**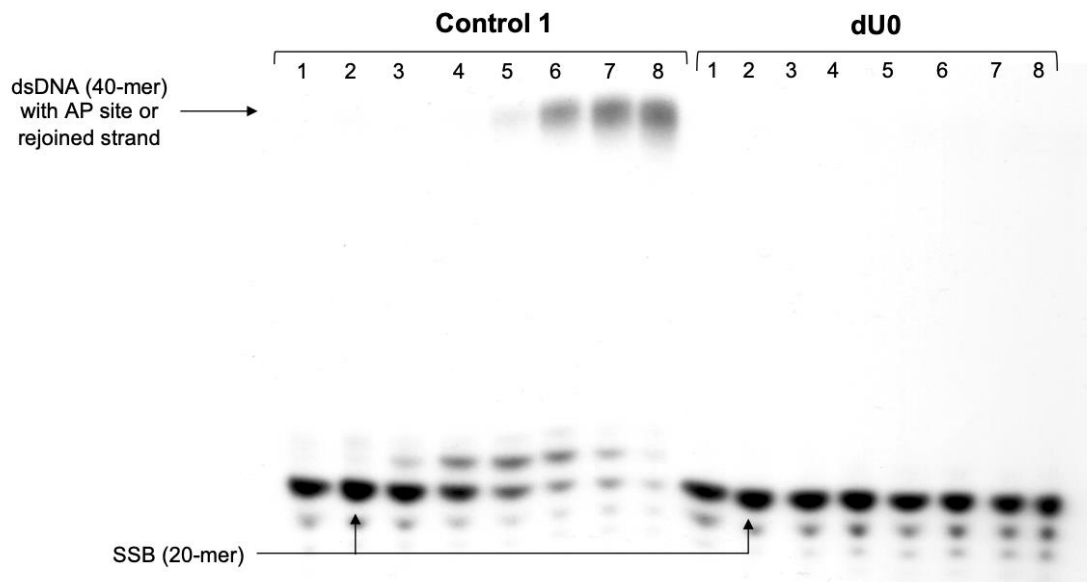**2**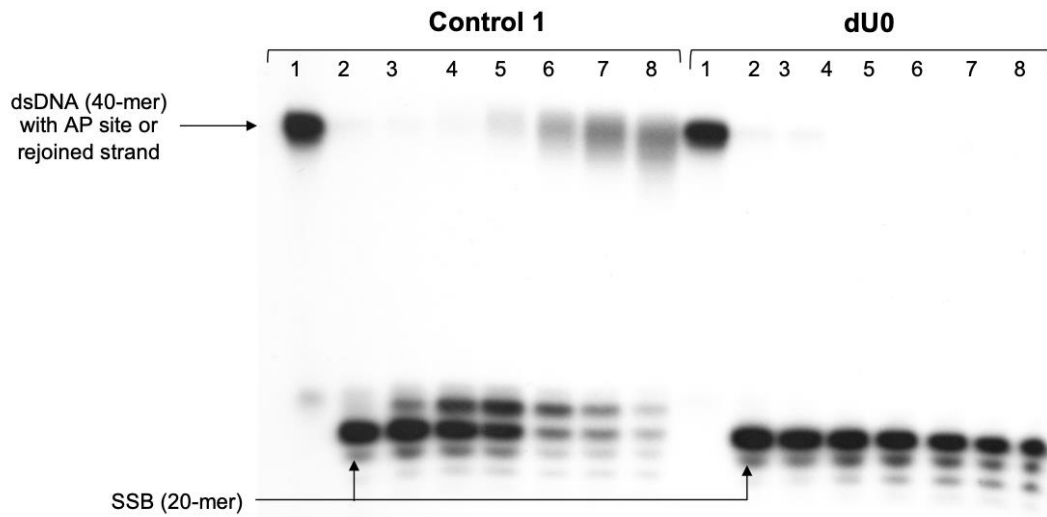**3**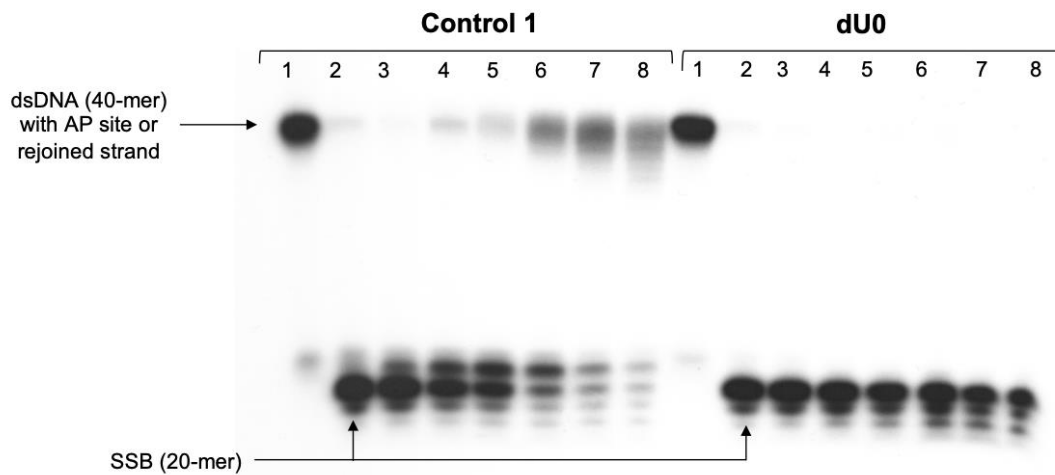

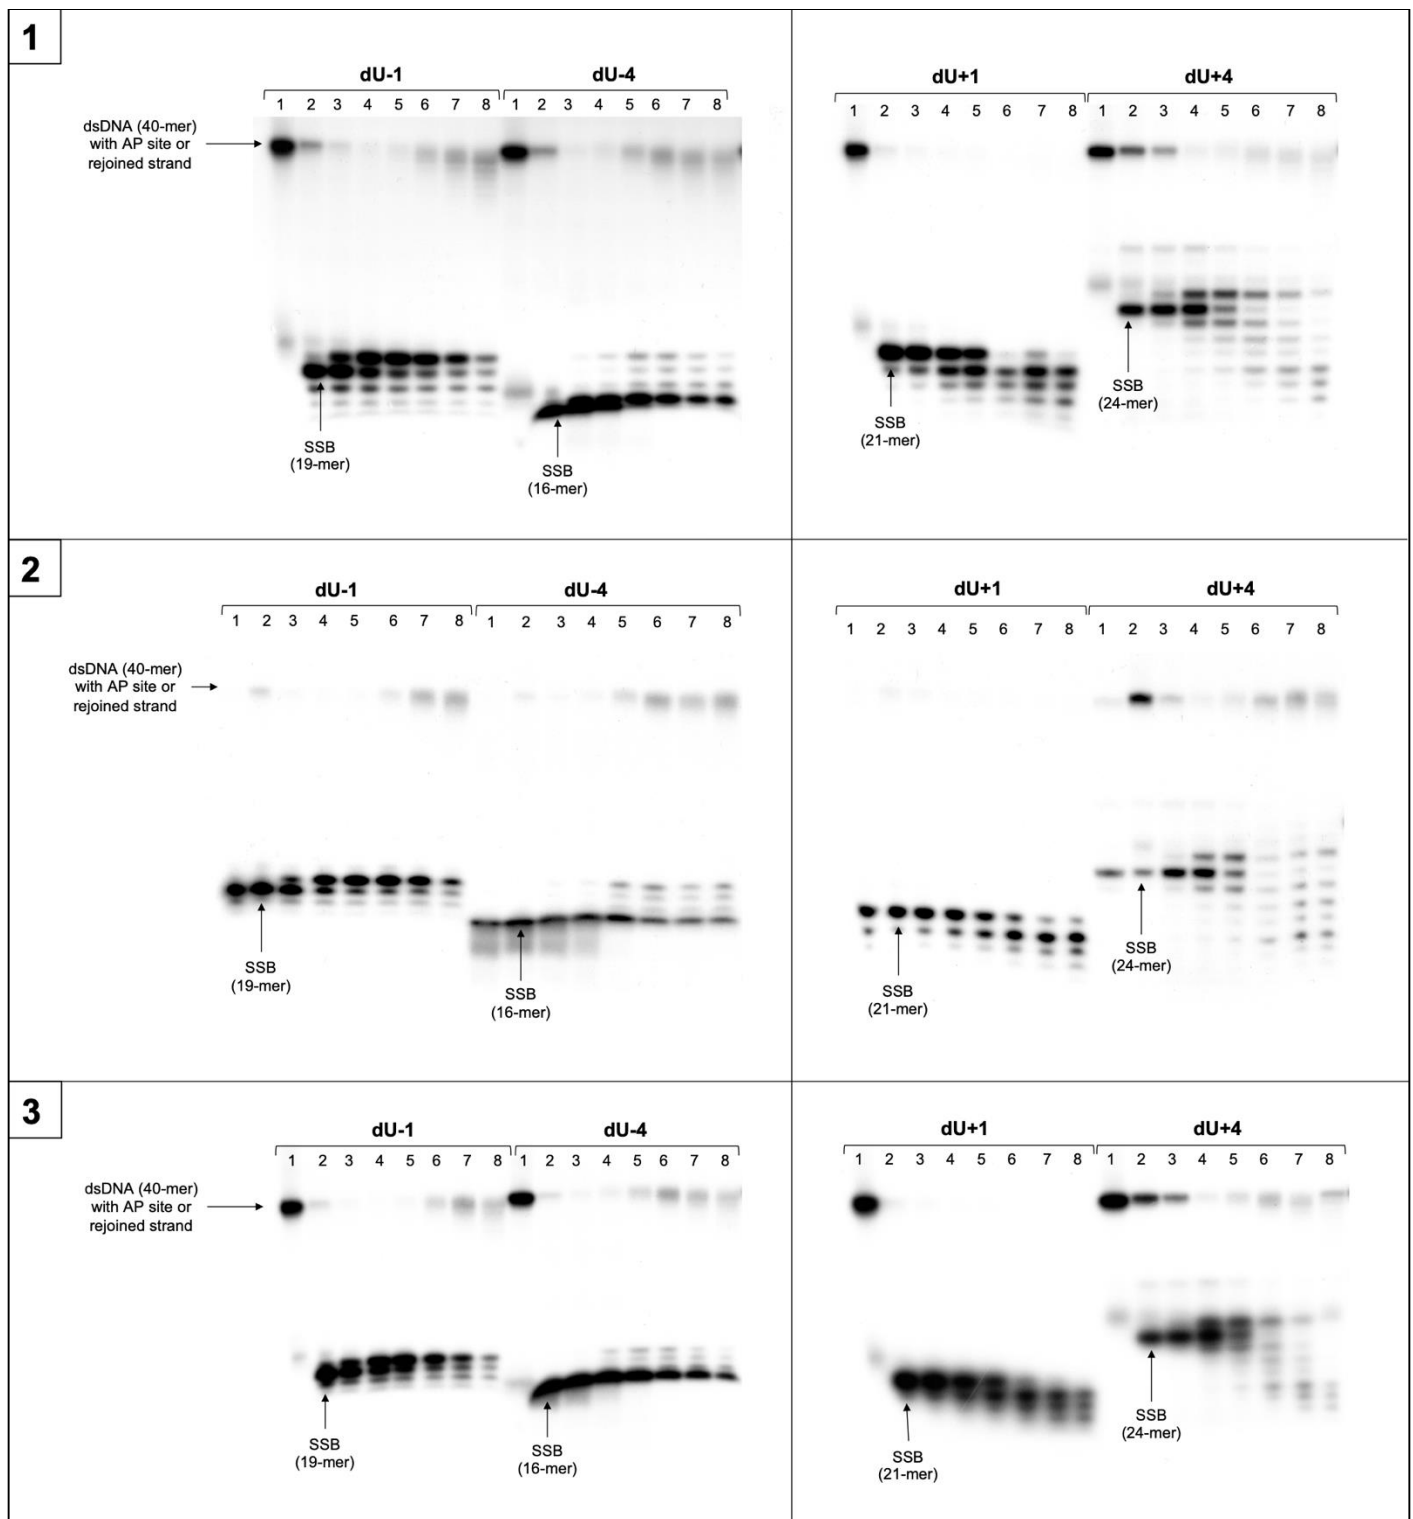

**Figure S5.** The autoradiograms presenting results of Control 1 and ds-CDL containing **RcdA** by **xrs5** Cytoplasmic Extract. Lanes correspond with different assay time: lane 1 - 0 min; lane 2 - 1 min; lane 3 - 5 min; lane 4 - 15 min; lane 5 - 30 min; lane 6 - 60 min; lane 7 - 90 min; lane 8 - 120 min. Three replications of the experiment are shown.

**1**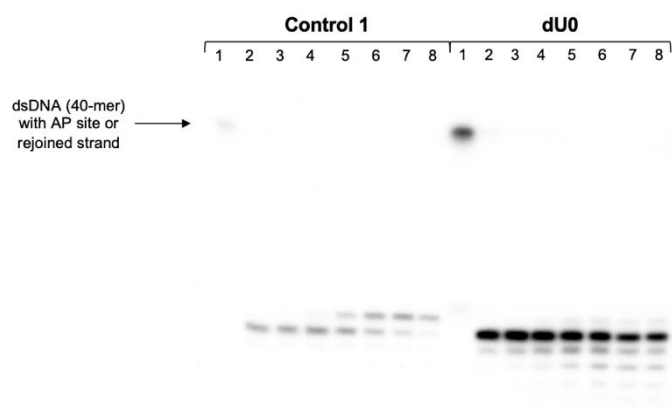**2**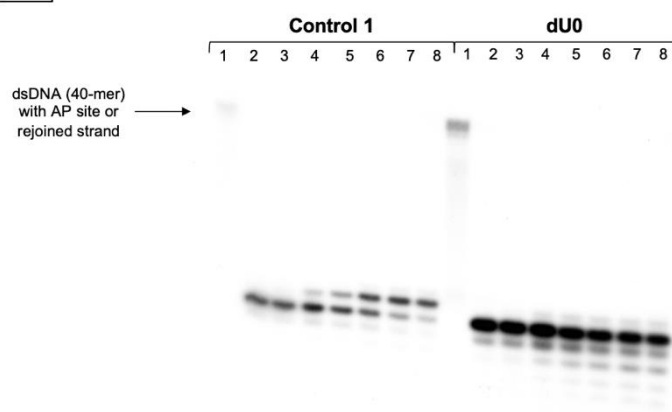**3**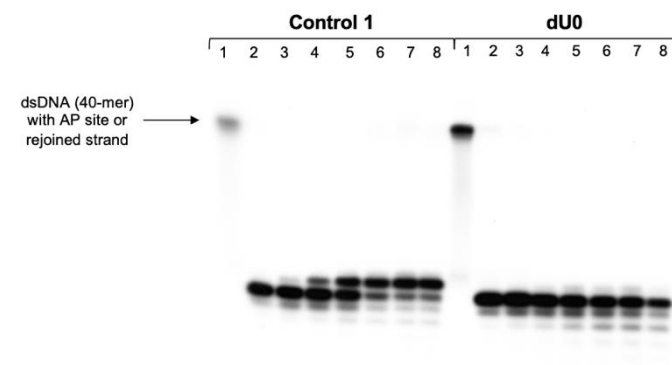

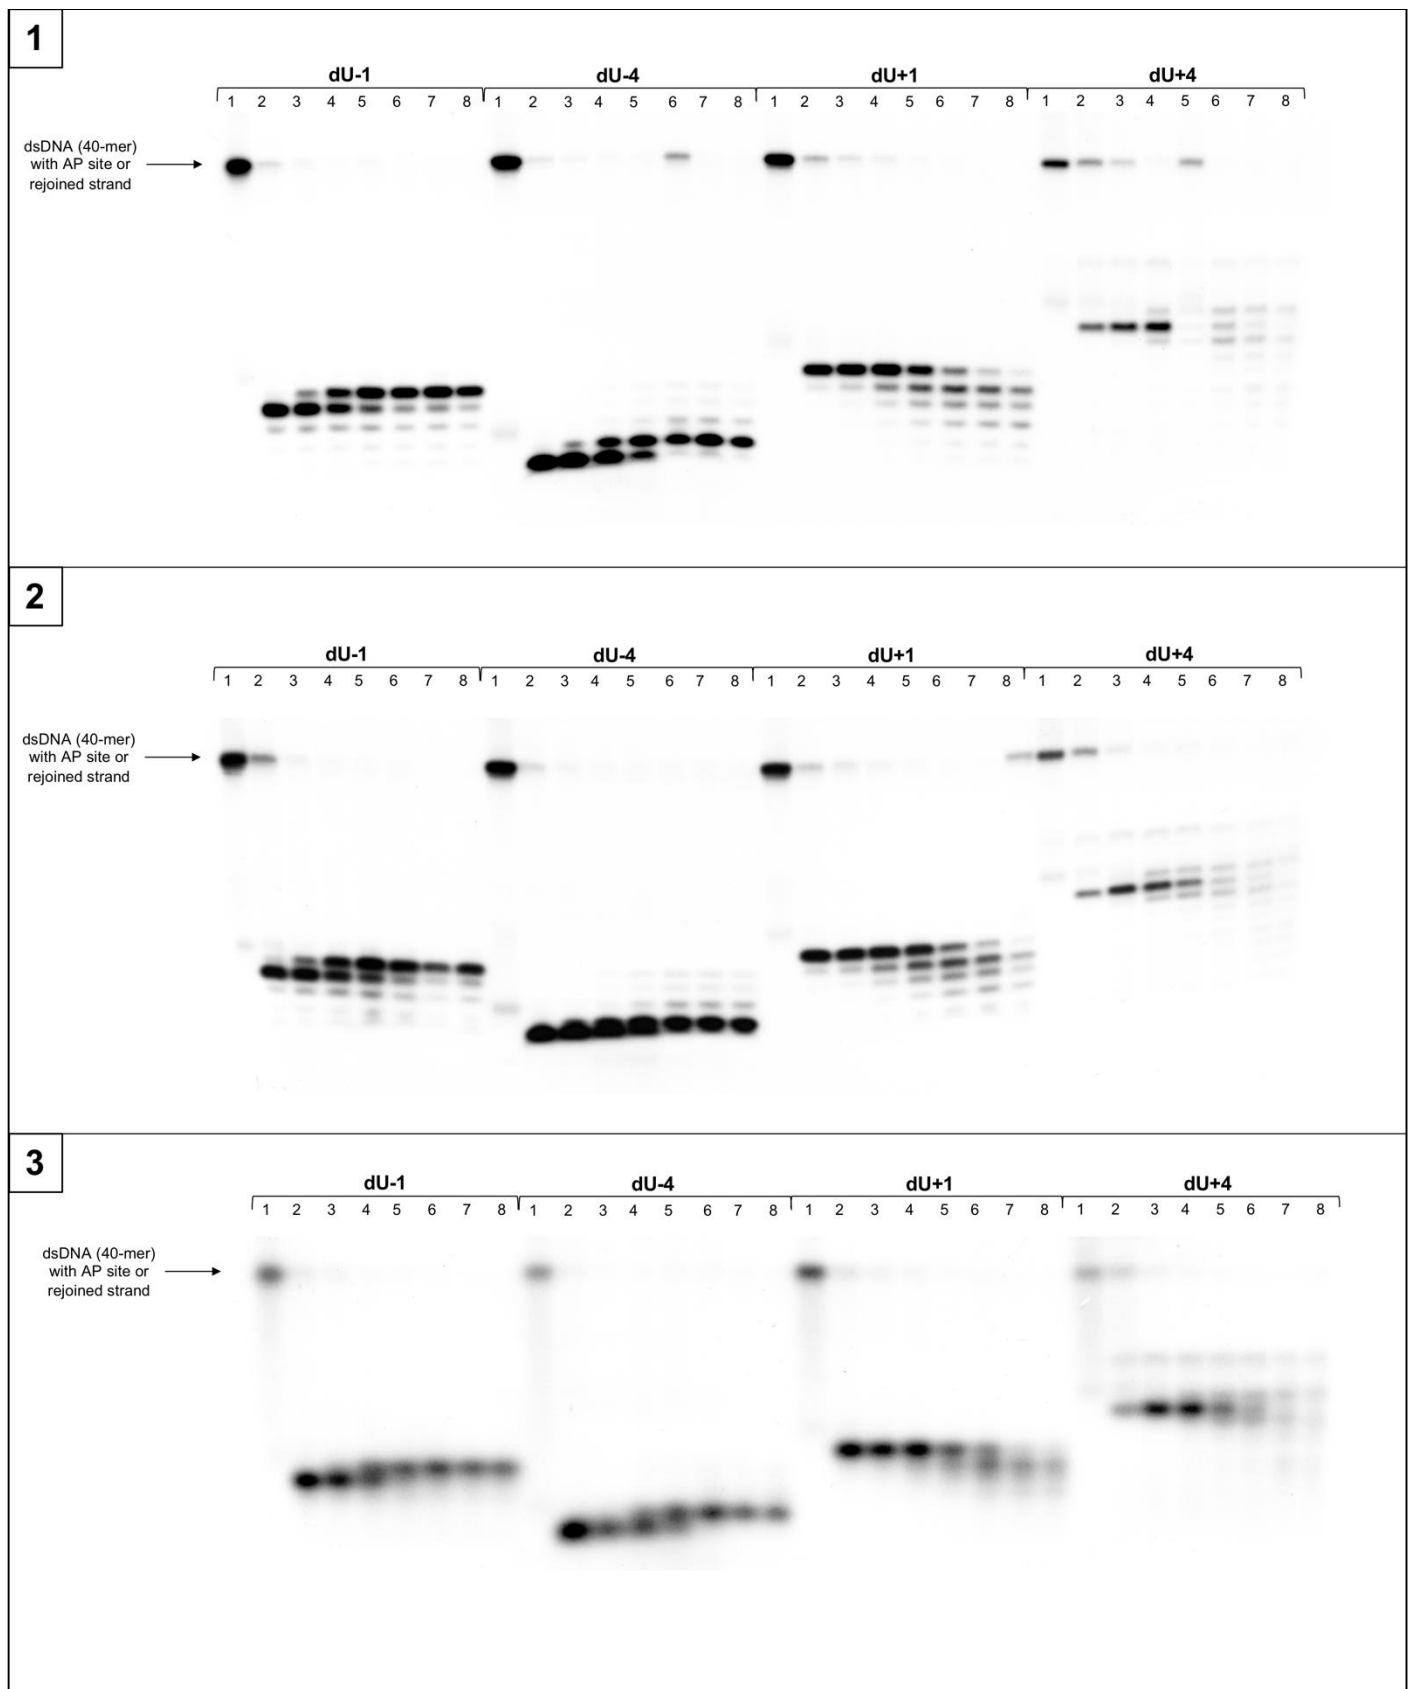

**Figure S6.** The autoradiograms presenting results of Control 1 and ds-CDL containing *ScdA* by BJ Cytoplasmic Extract. Lanes correspond with different assay time: lane 1 - 0 min; lane 2 - 1 min; lane 3 - 5 min; lane 4 - 15 min; lane 5 - 30 min; lane 6 - 60 min; lane 7 - 90 min; lane 8 - 120 min. Three replications of the experiment are shown.

**1**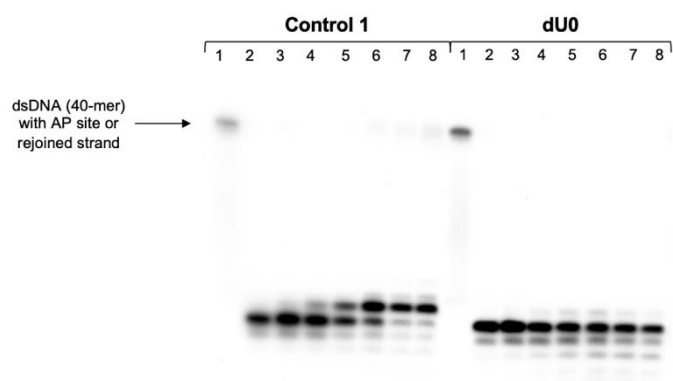**2**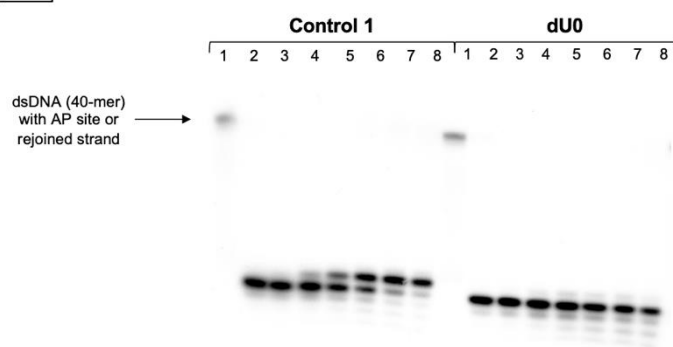**3**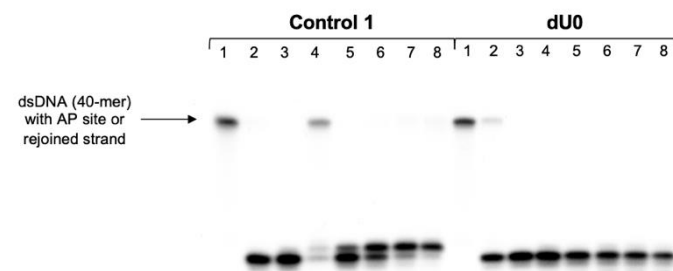



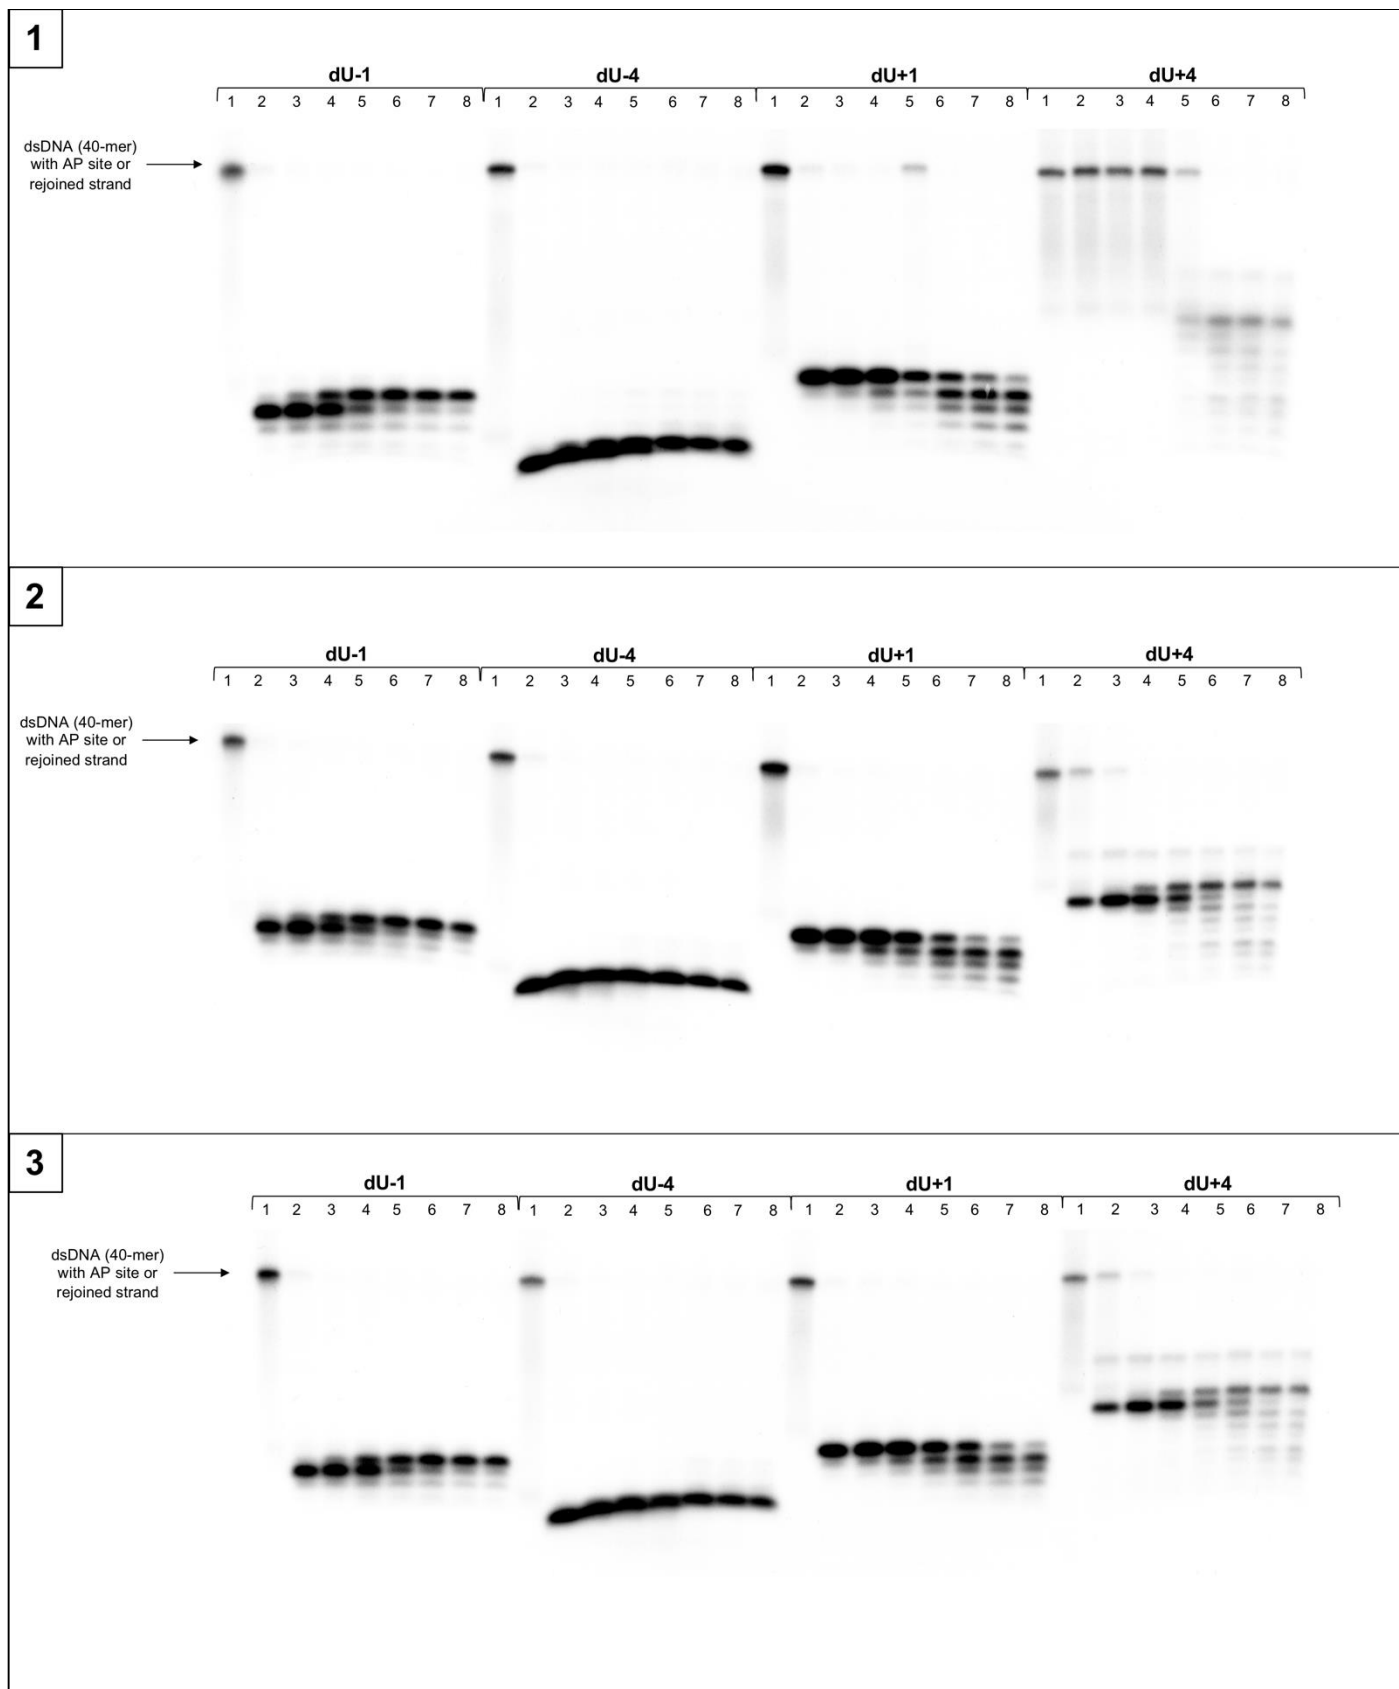

**Figure S7.** The autoradiograms presenting results of Control 1 and ds-CDL containing **RcdA** by **BJ** Cytoplasmic Extract. Lanes correspond with different assay time: lane 1 - 0 min; lane 2 - 1 min; lane 3 - 5 min; lane 4 - 15 min; lane 5 - 30 min; lane 6 - 60 min; lane 7 - 90 min; lane 8 - 120 min. Three replications of the experiment are shown.

**1**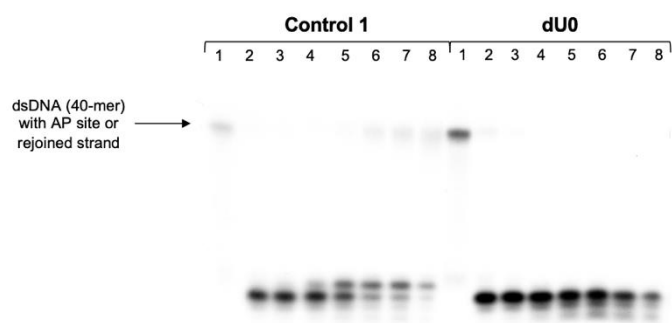**2**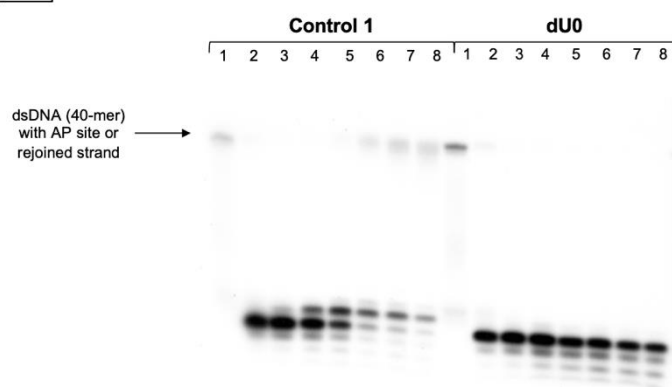**3**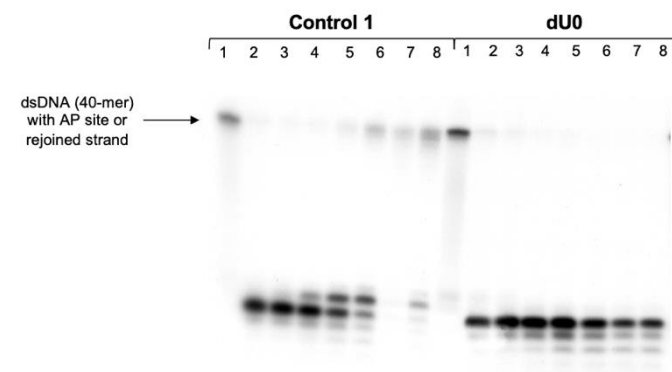

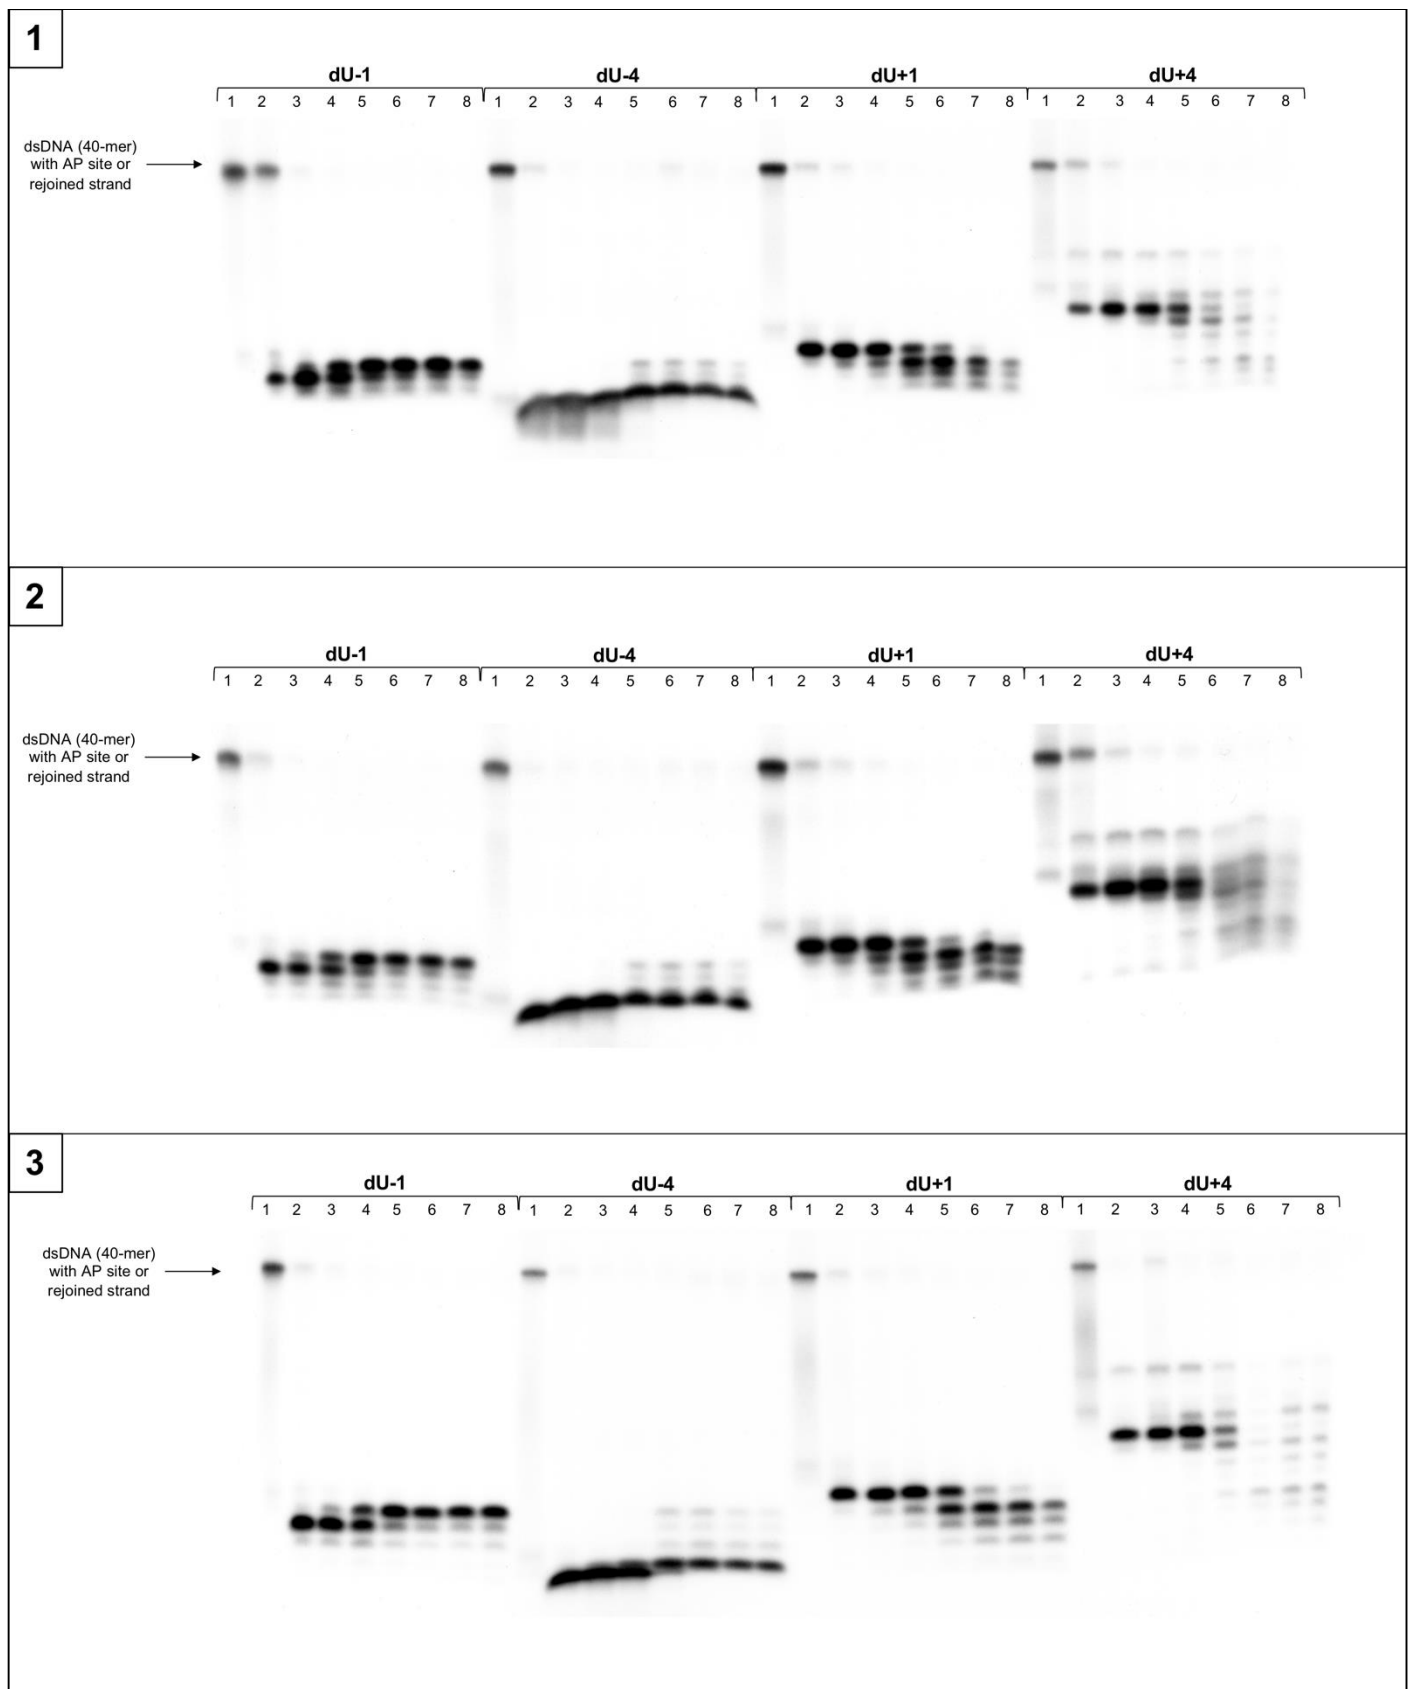

**Figure S8.** The autoradiograms presenting results of Control 1 and ds-CDL containing *ScdA* by XPC Cytoplasmic Extract. Lanes correspond with different assay time: lane 1 - 0 min; lane 2 - 1 min; lane 3 - 5 min; lane 4 - 15 min; lane 5 - 30 min; lane 6 - 60 min; lane 7 - 90 min; lane 8 - 120 min. Three replications of the experiment are shown.

**1**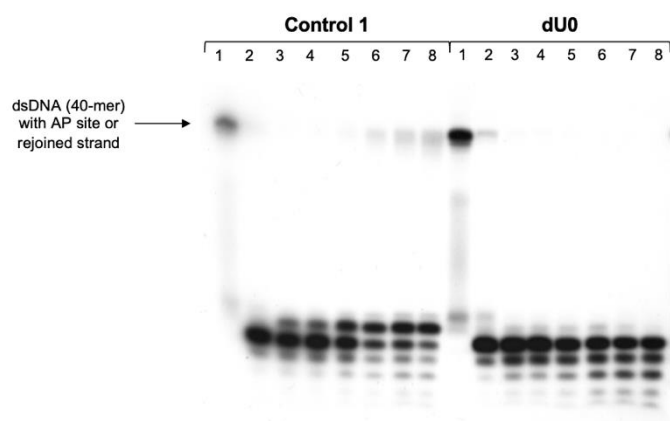**2**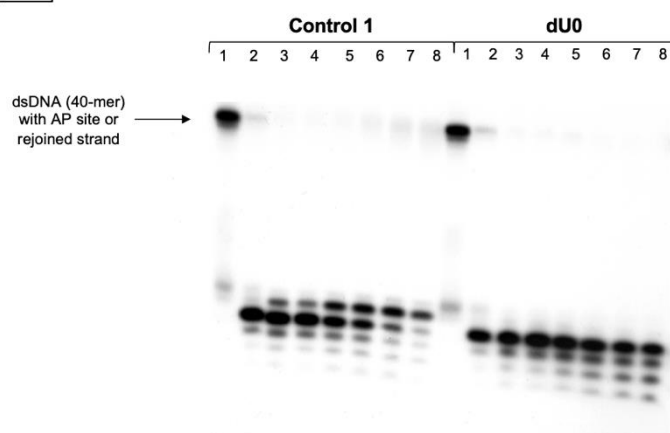**3**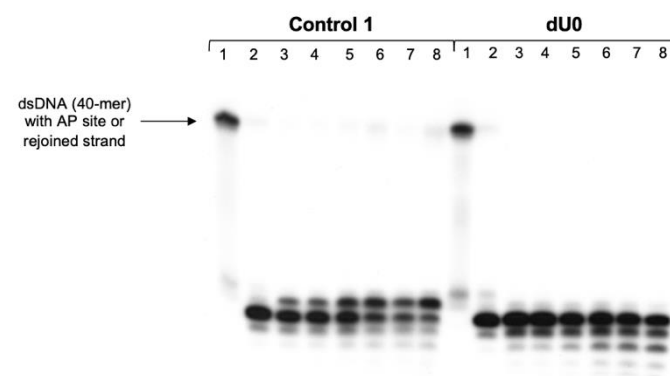

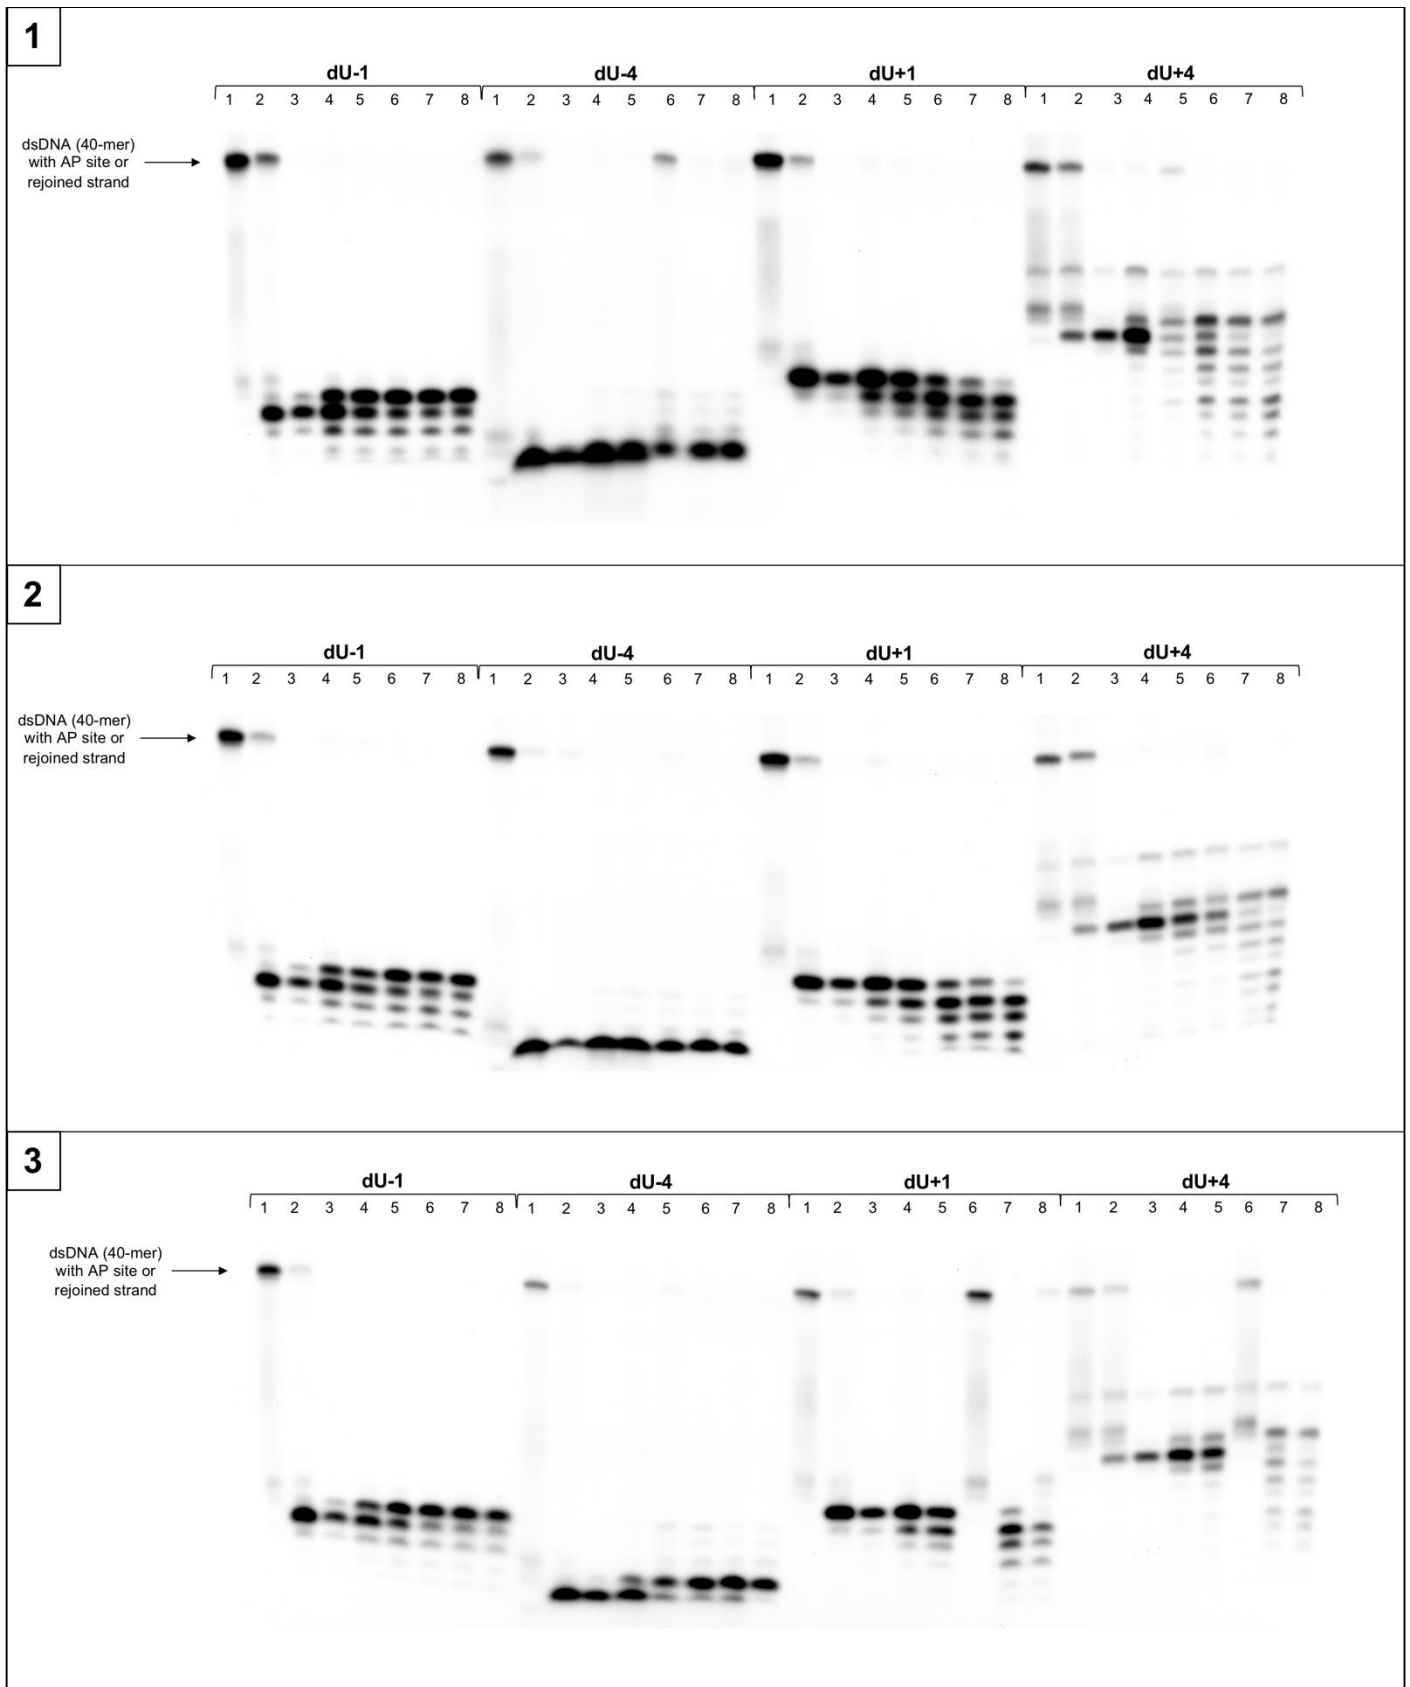

**Figure S9.** The autoradiograms presenting results of Control 1 and ds-CDL containing *RcdA* by XPC Cytoplasmic Extract. Lanes correspond with different assay time: lane 1 - 0 min; lane 2 - 1 min; lane 3 - 5 min; lane 4 - 15 min; lane 5 - 30 min; lane 6 - 60 min; lane 7 - 90 min; lane 8 - 120 min. Three replications of the experiment are shown.

## Graphical representation of DNA repair assays' results - comparison of individual strands between cell lines

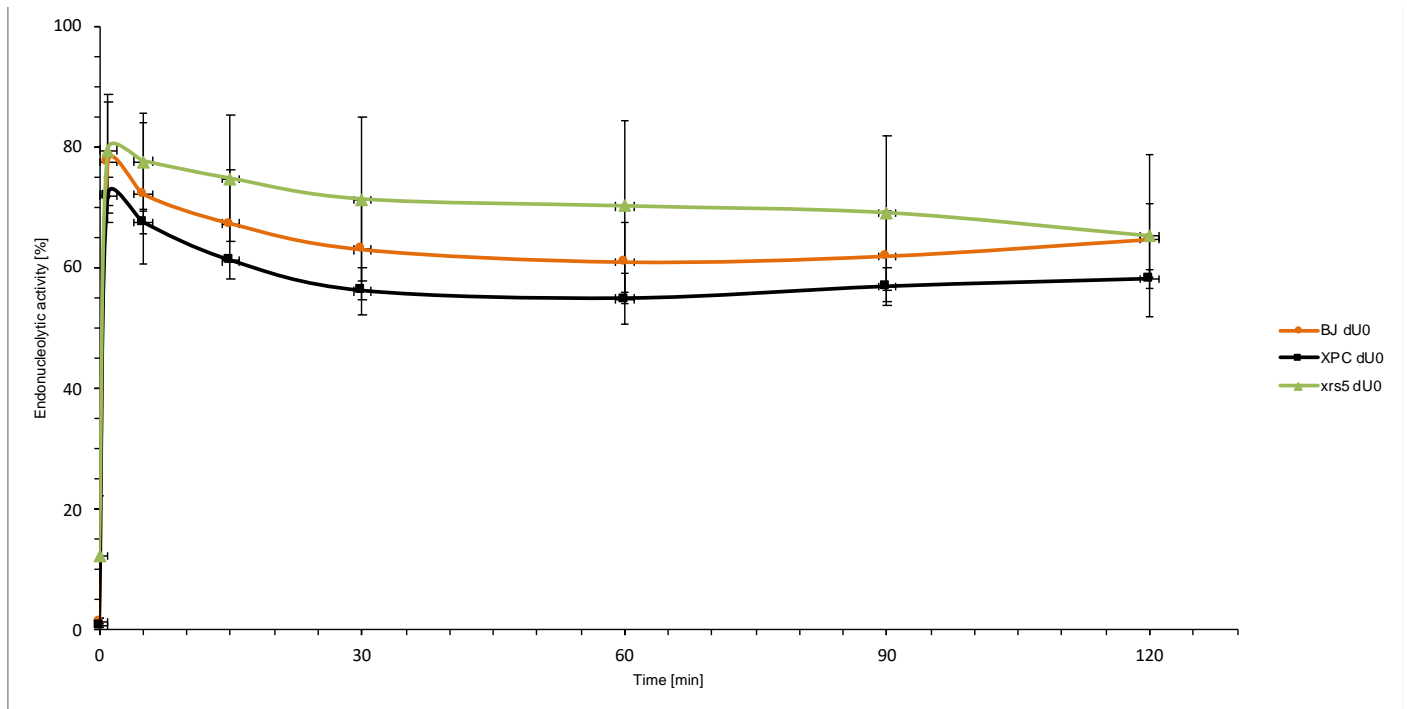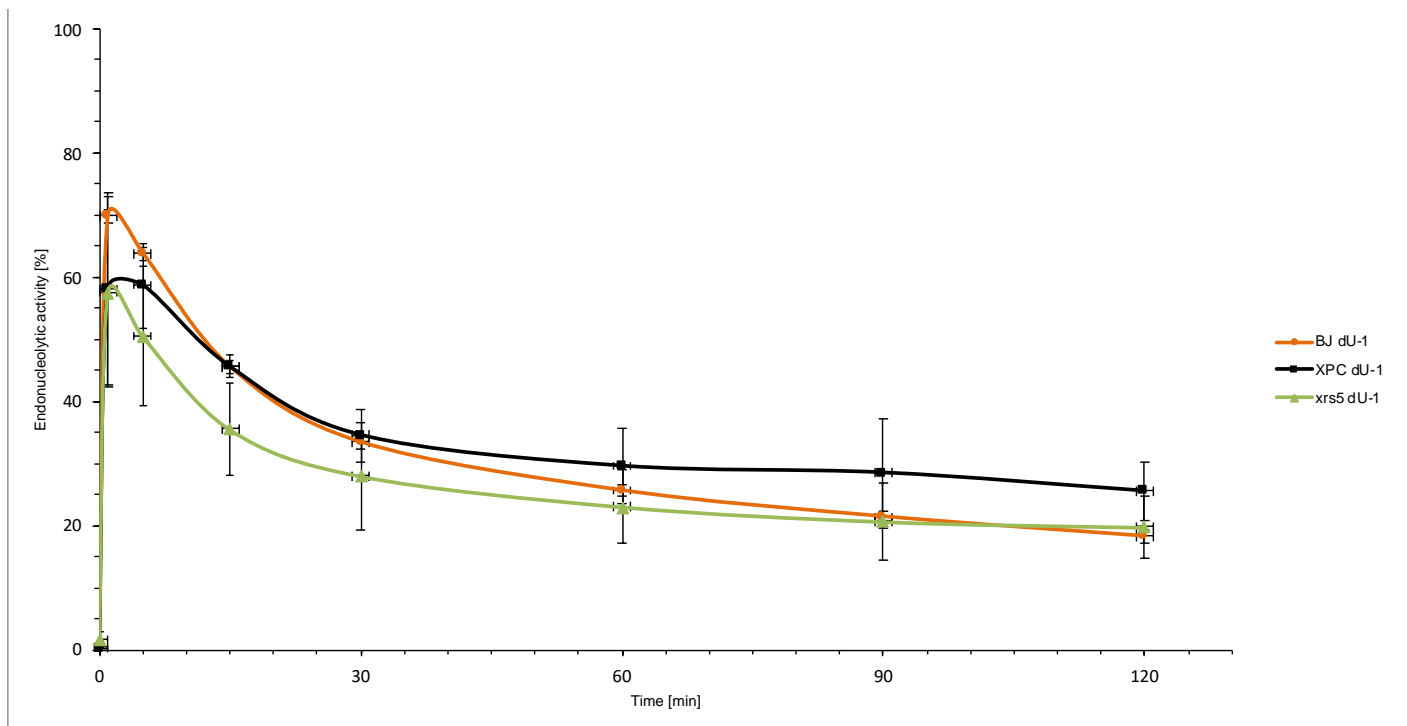

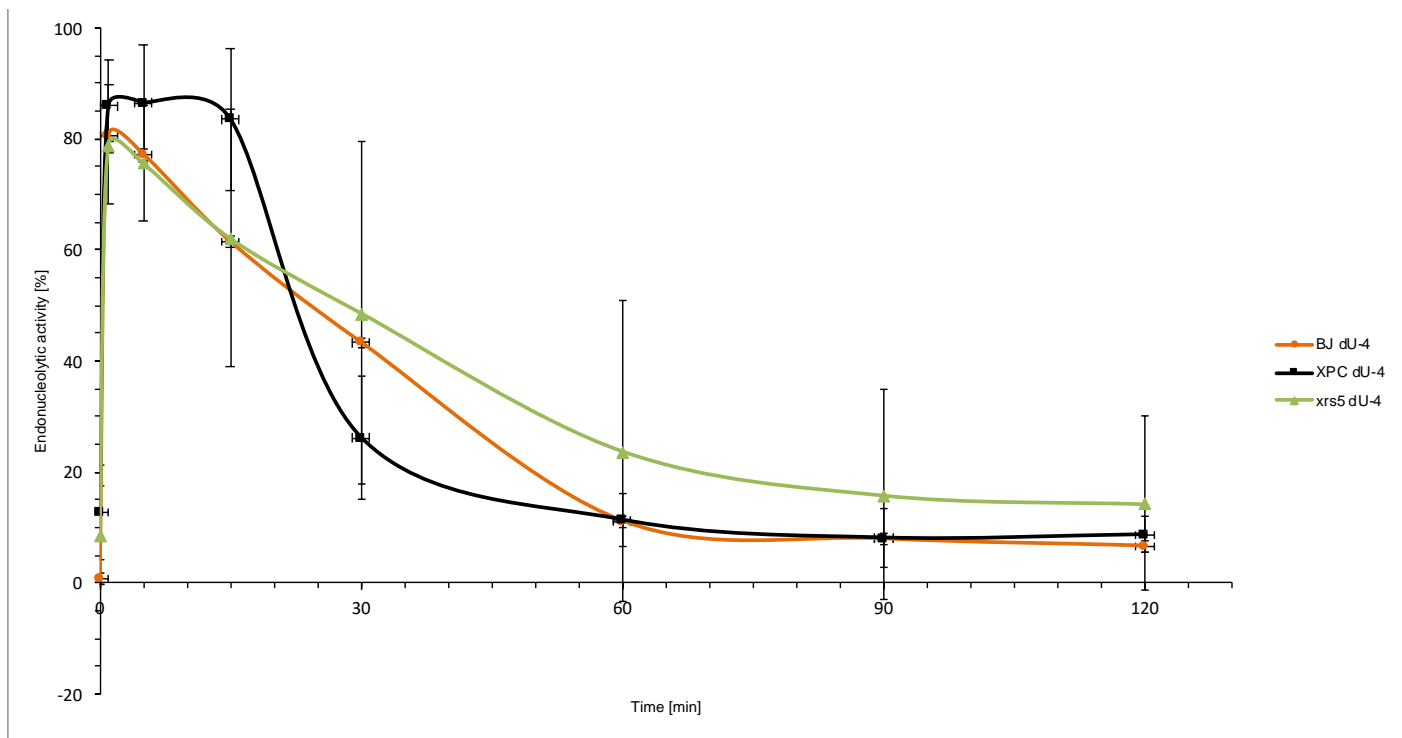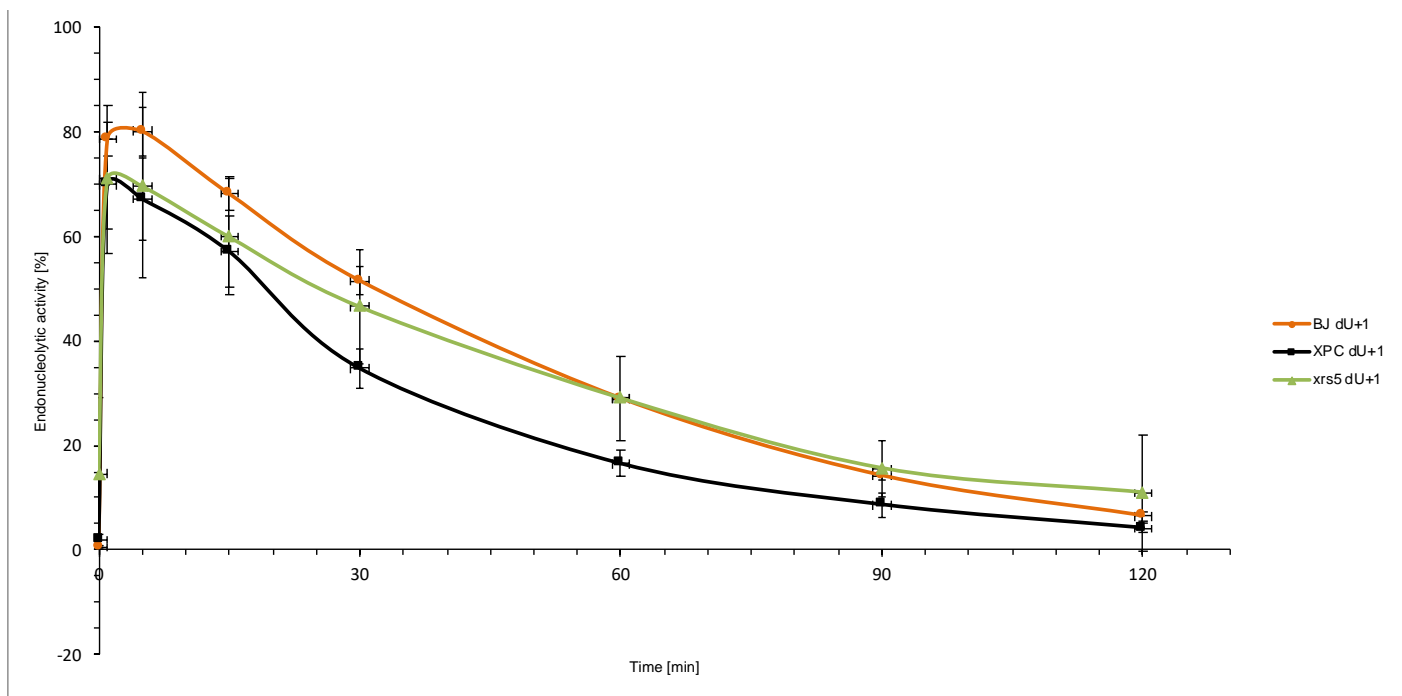



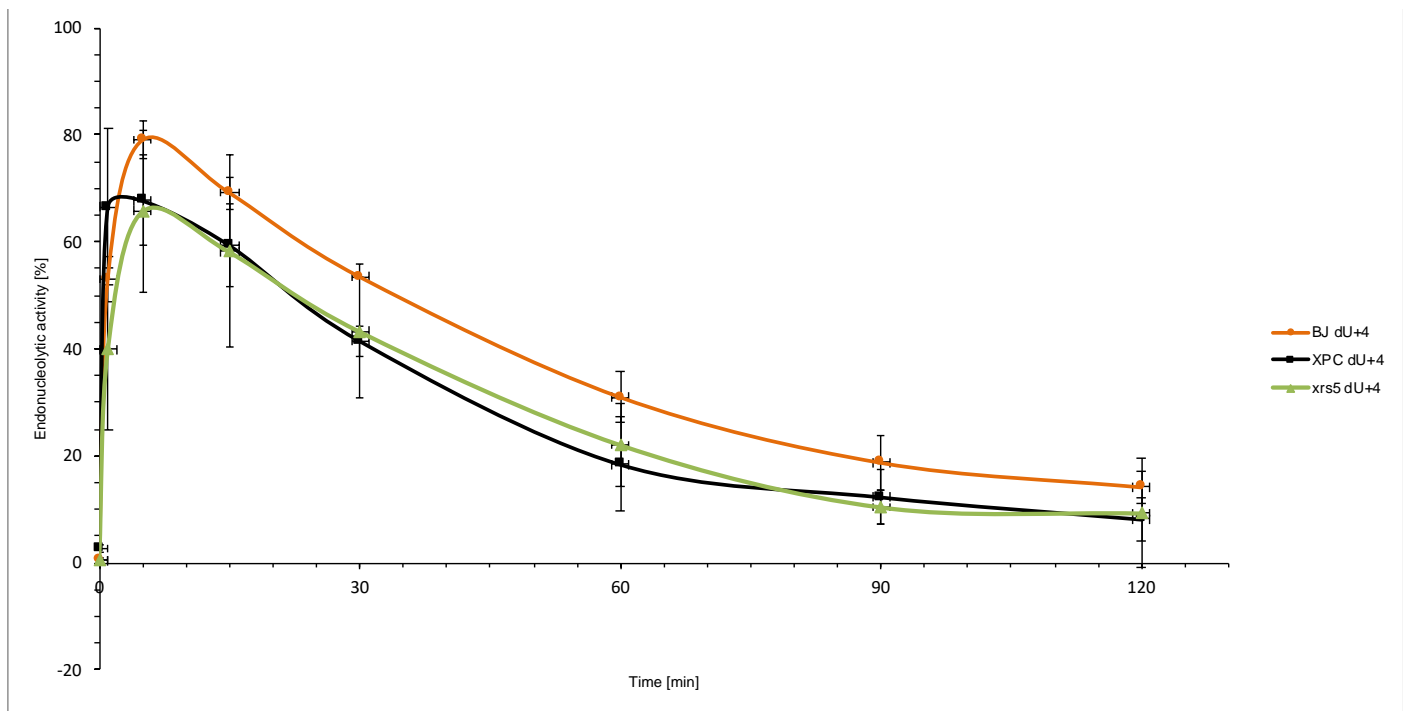

**Figure S10.** Endonucleolytic activity (strand incision) [%] of xrs5 vs. BJ vs. XPC – comparison of individual strands – **ScdA** Cytoplasmic Extract.

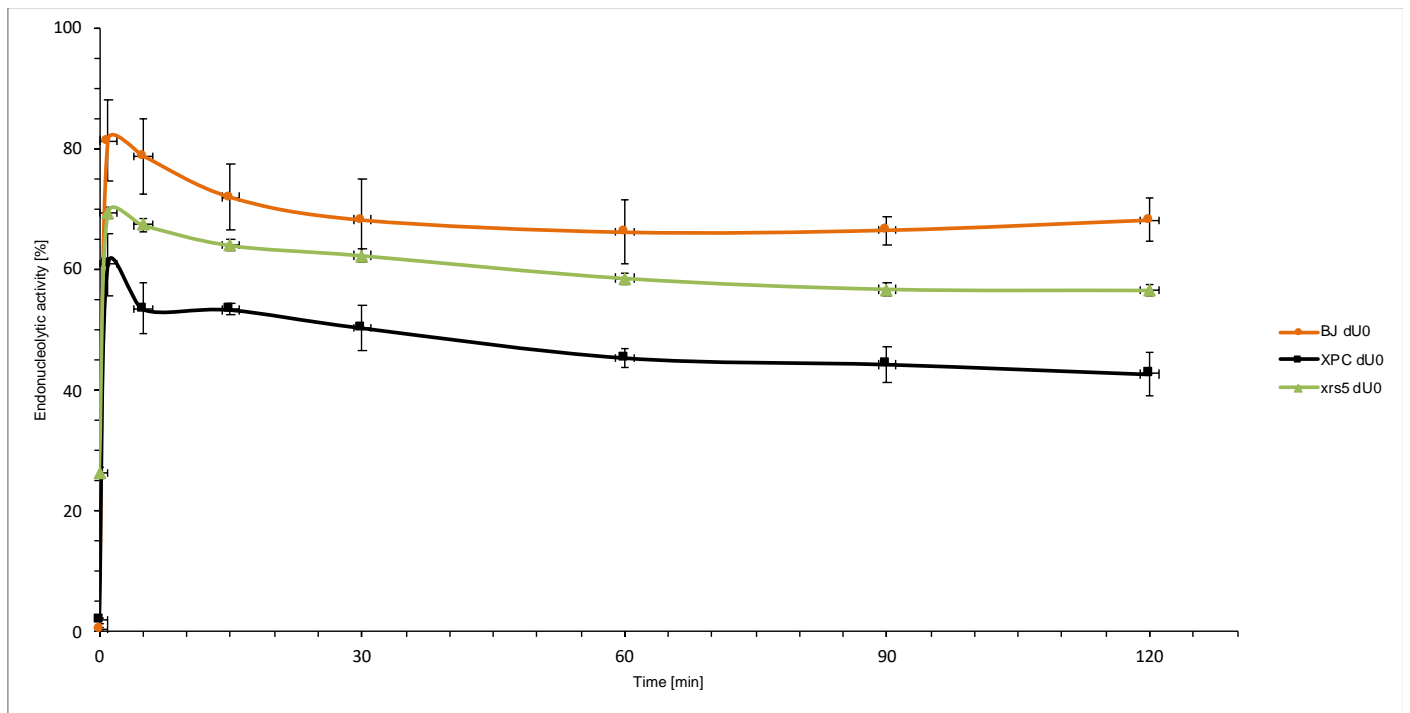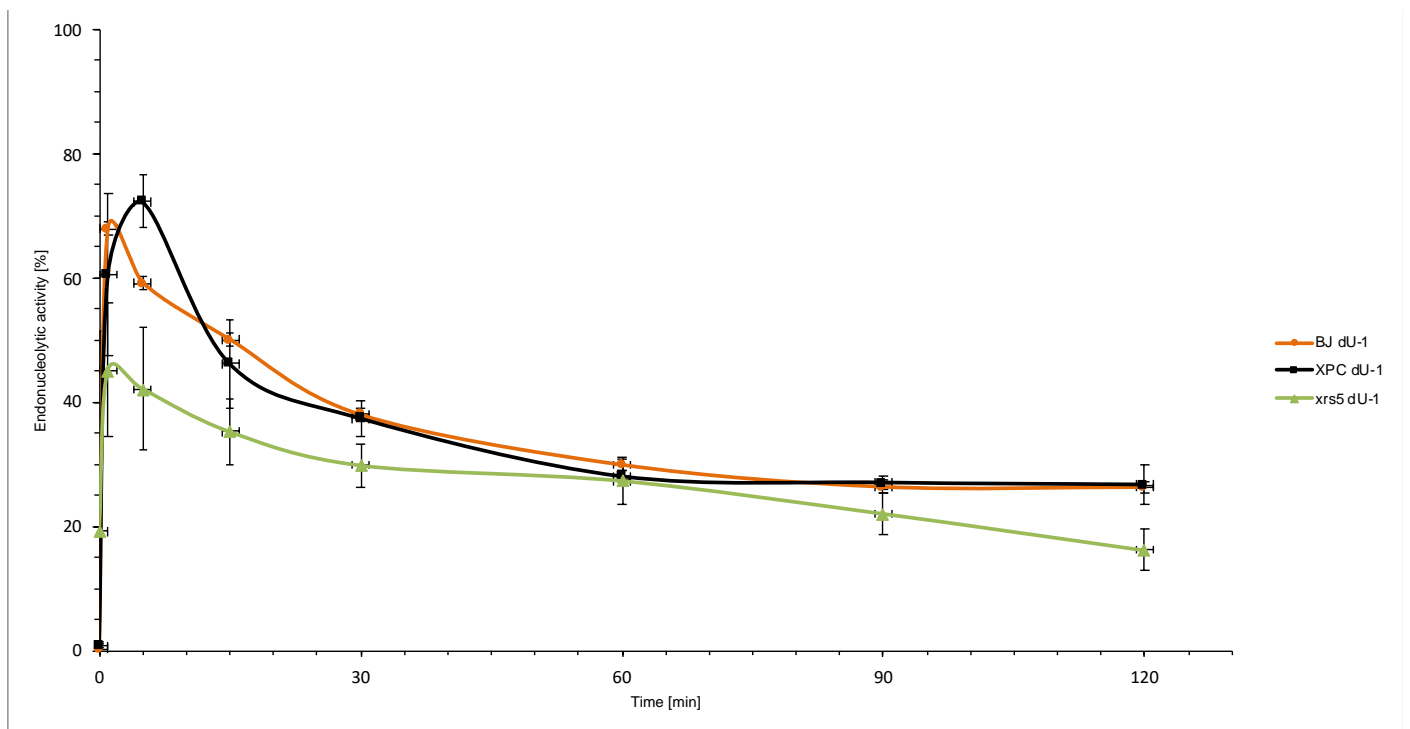

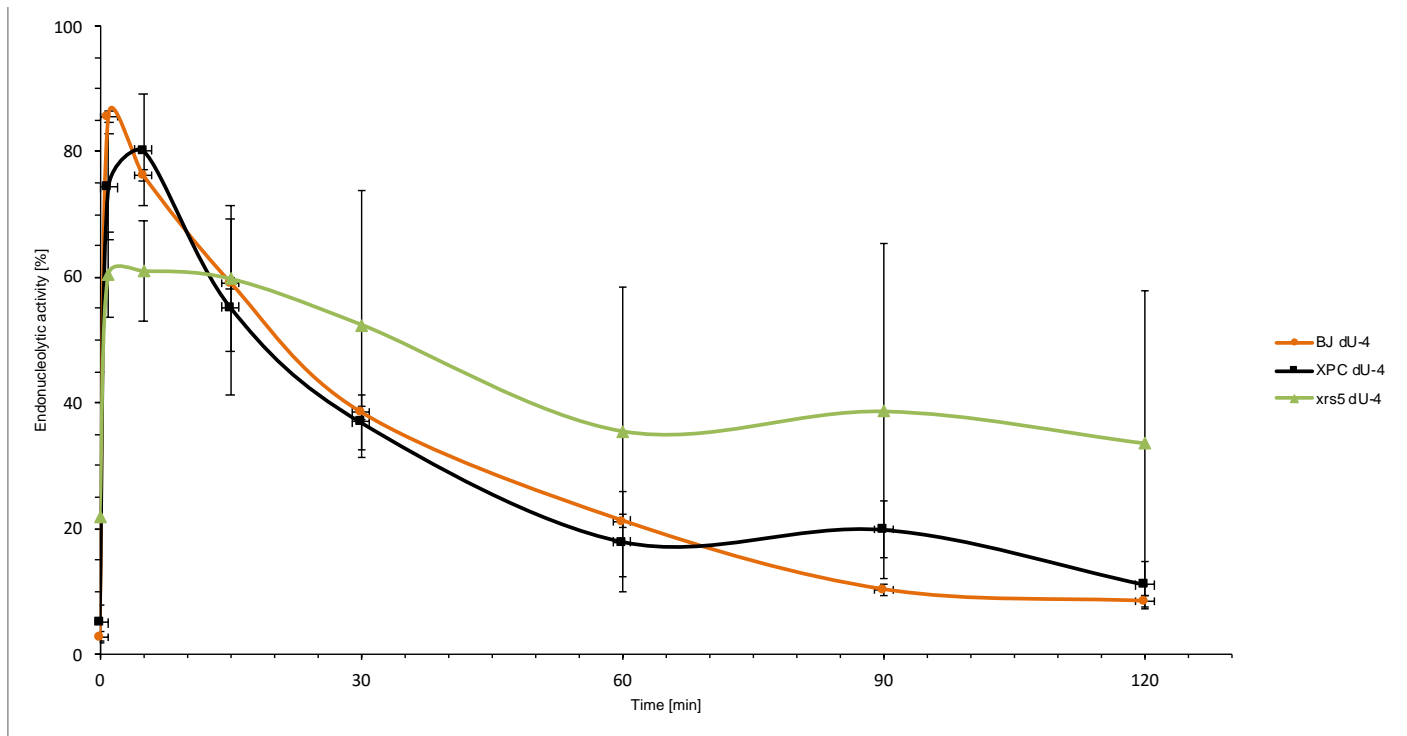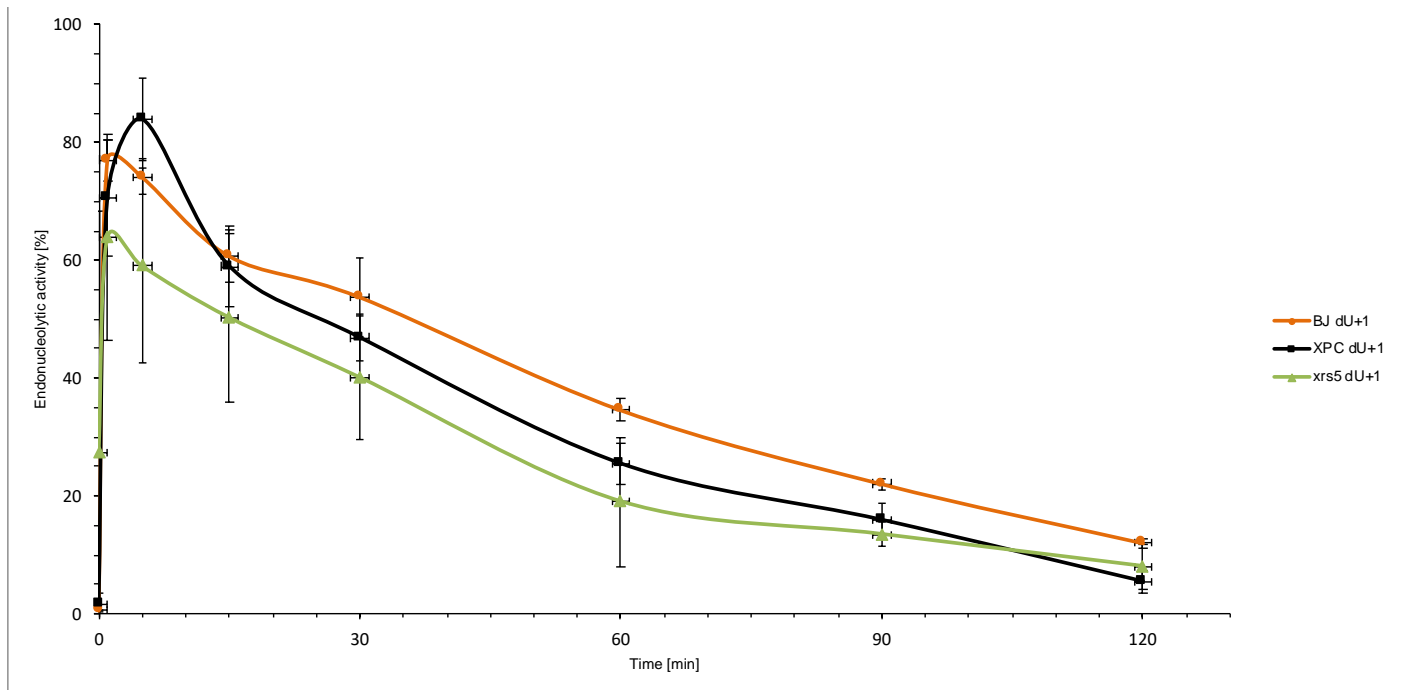

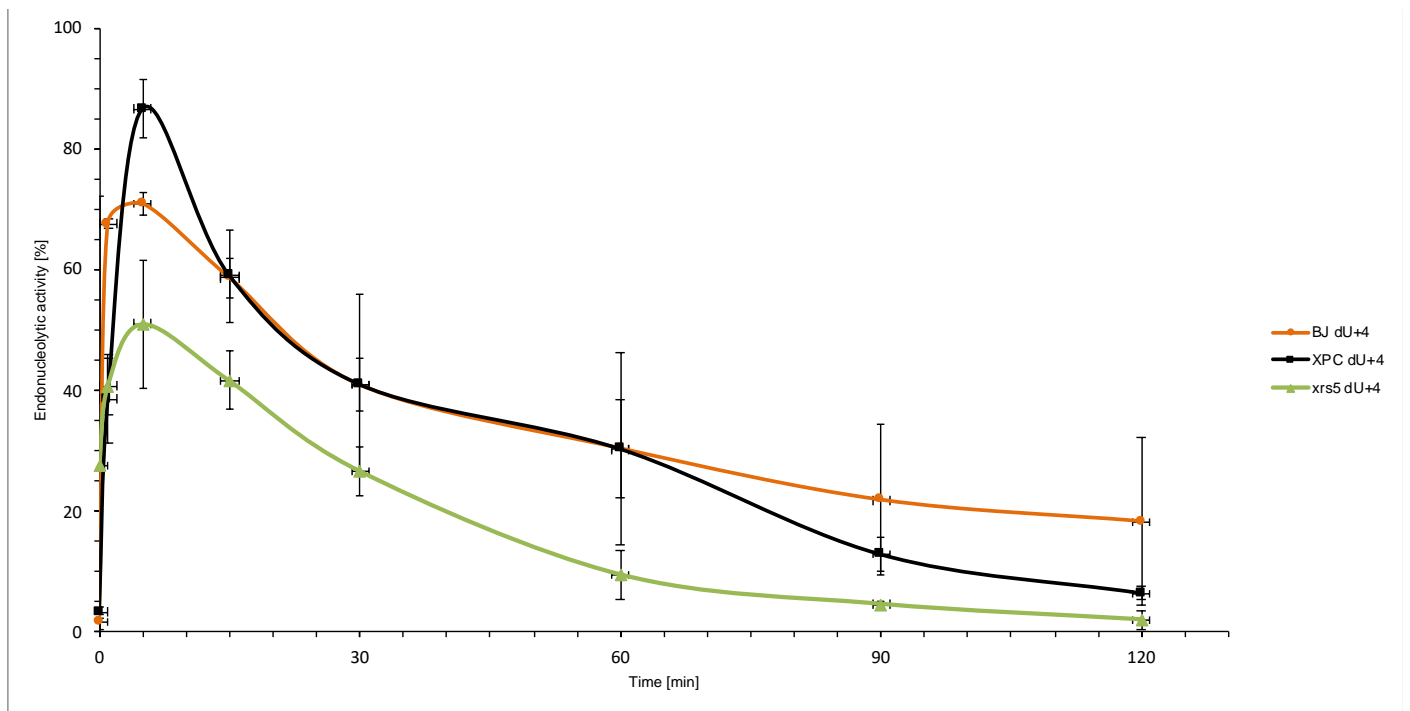

**Figure S11.** Endonucleolytic activity (strand incision) [%] of xrs5 vs. BJ vs. XPC – comparison of individual strands – **RcdA** Cytoplasmic Extract.

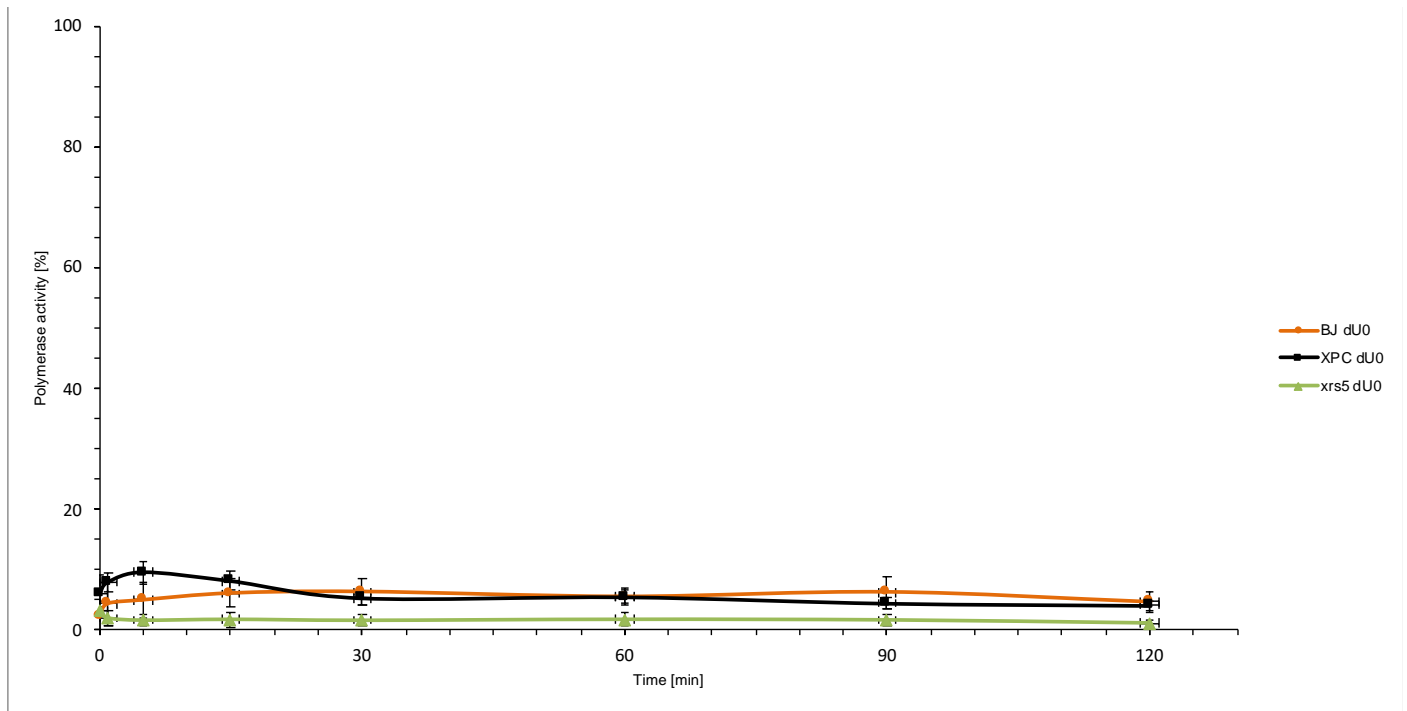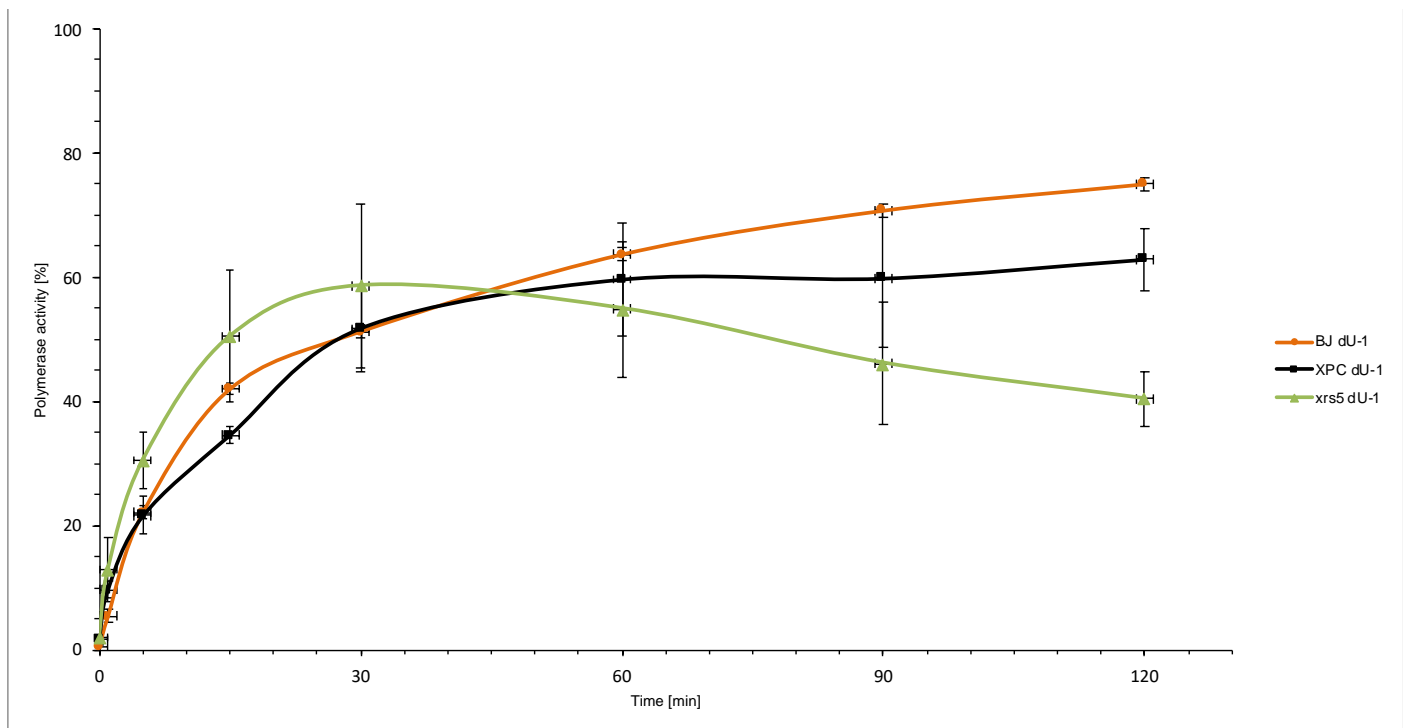

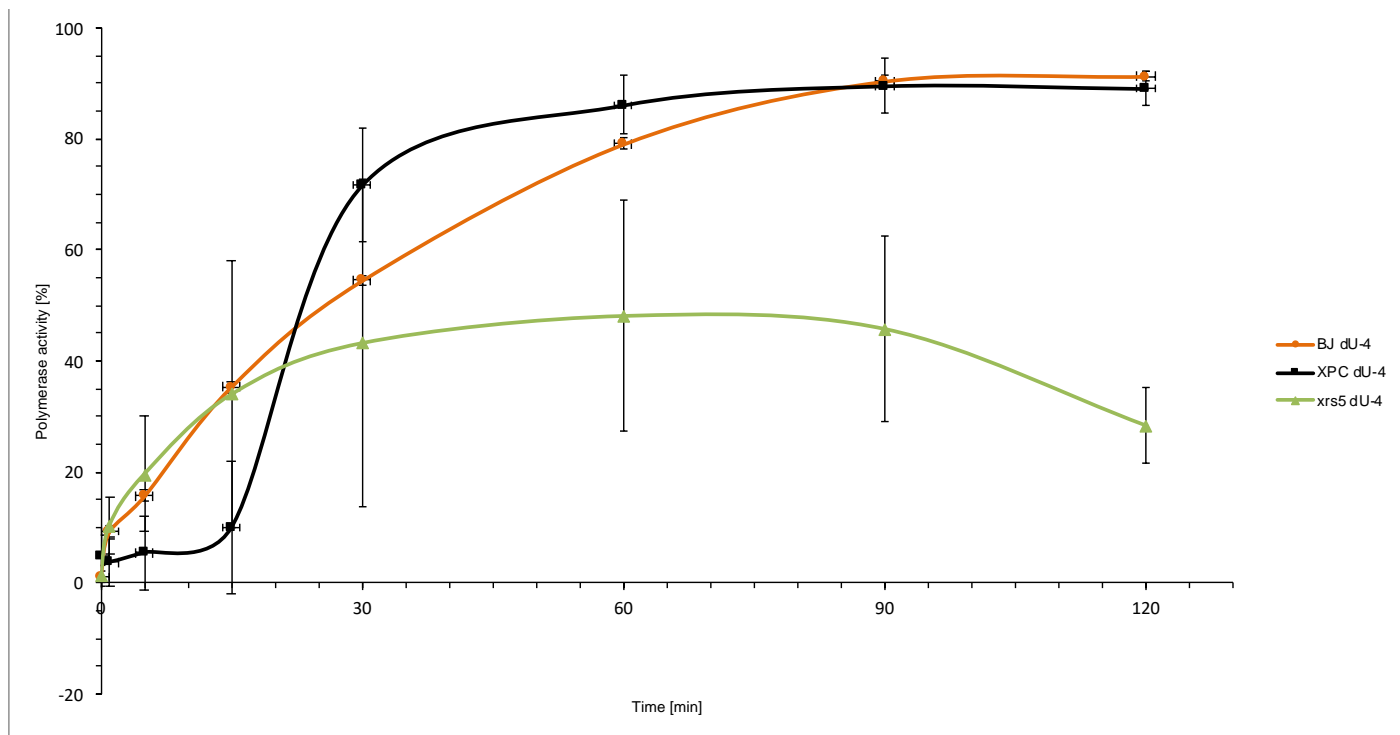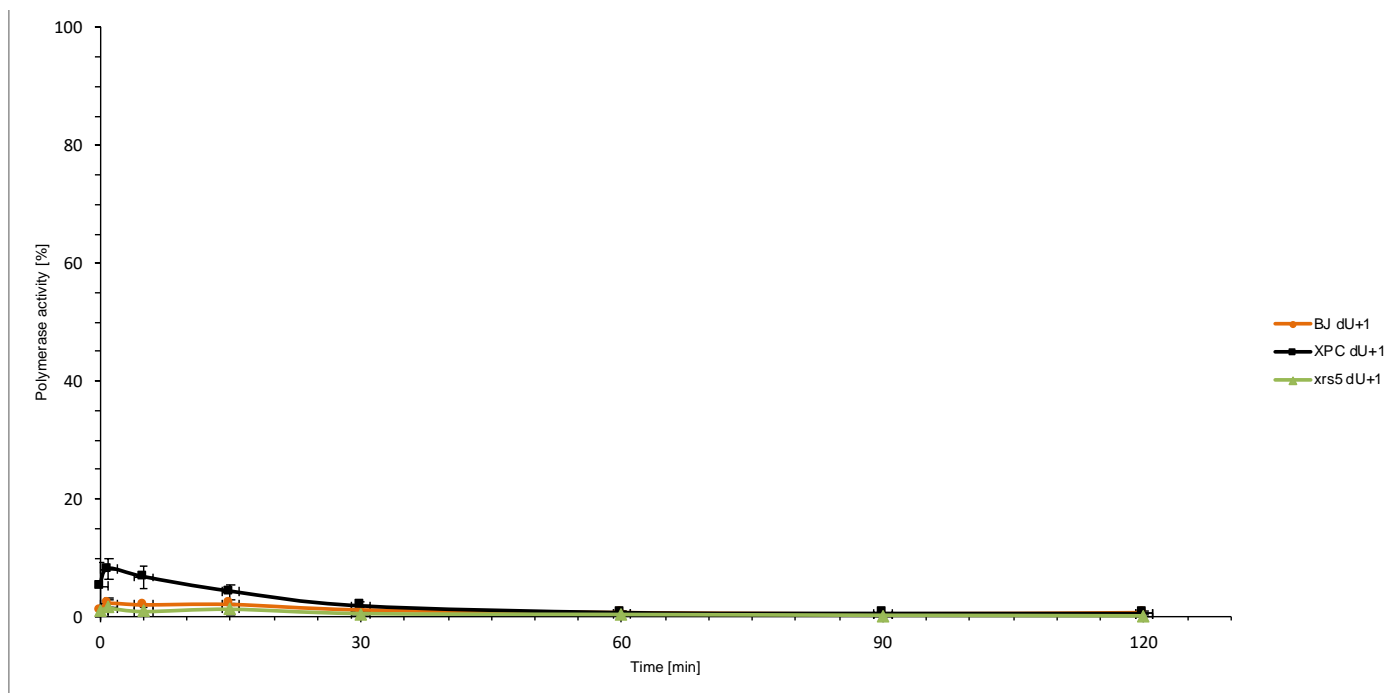

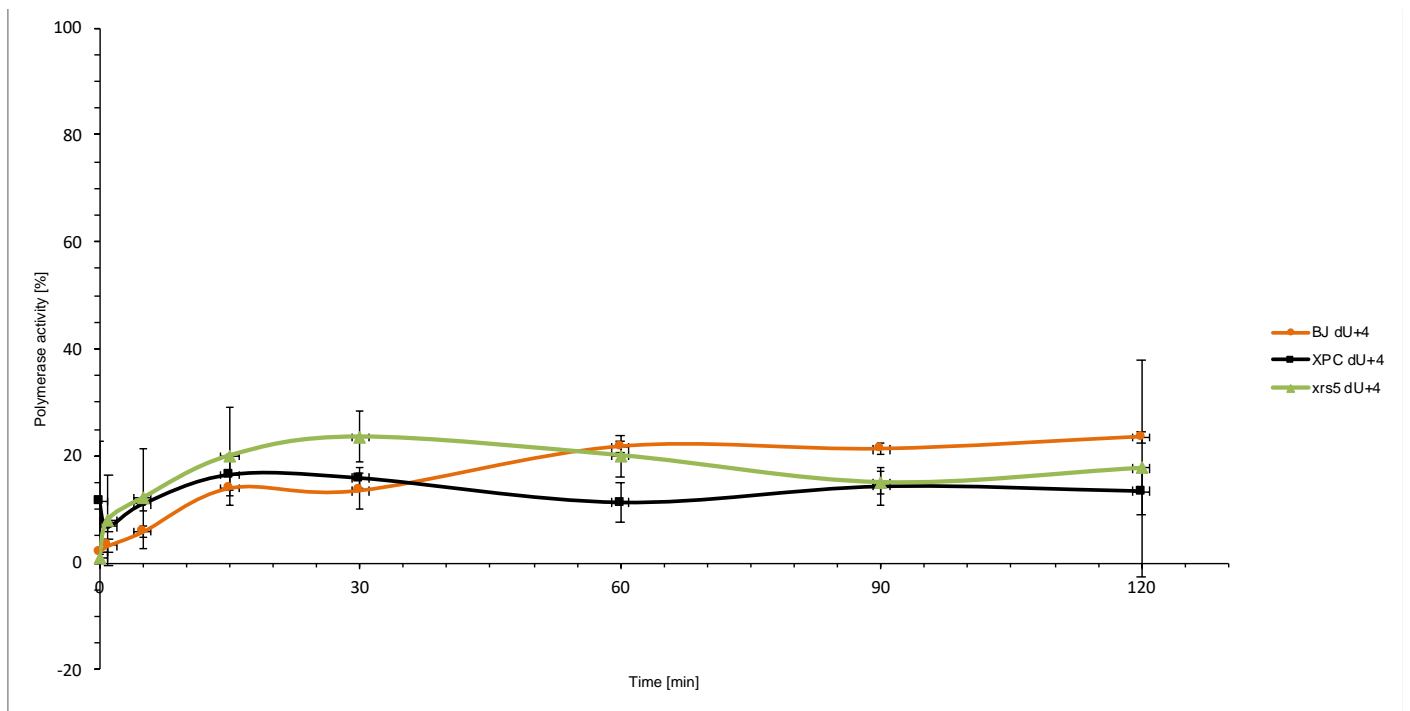

**Figure S12.** Polymerase activity (strand elongation) [%] of xrs5 vs. BJ vs. XPC – comparison of individual strands – **ScdA** Cytoplasmic Extract.

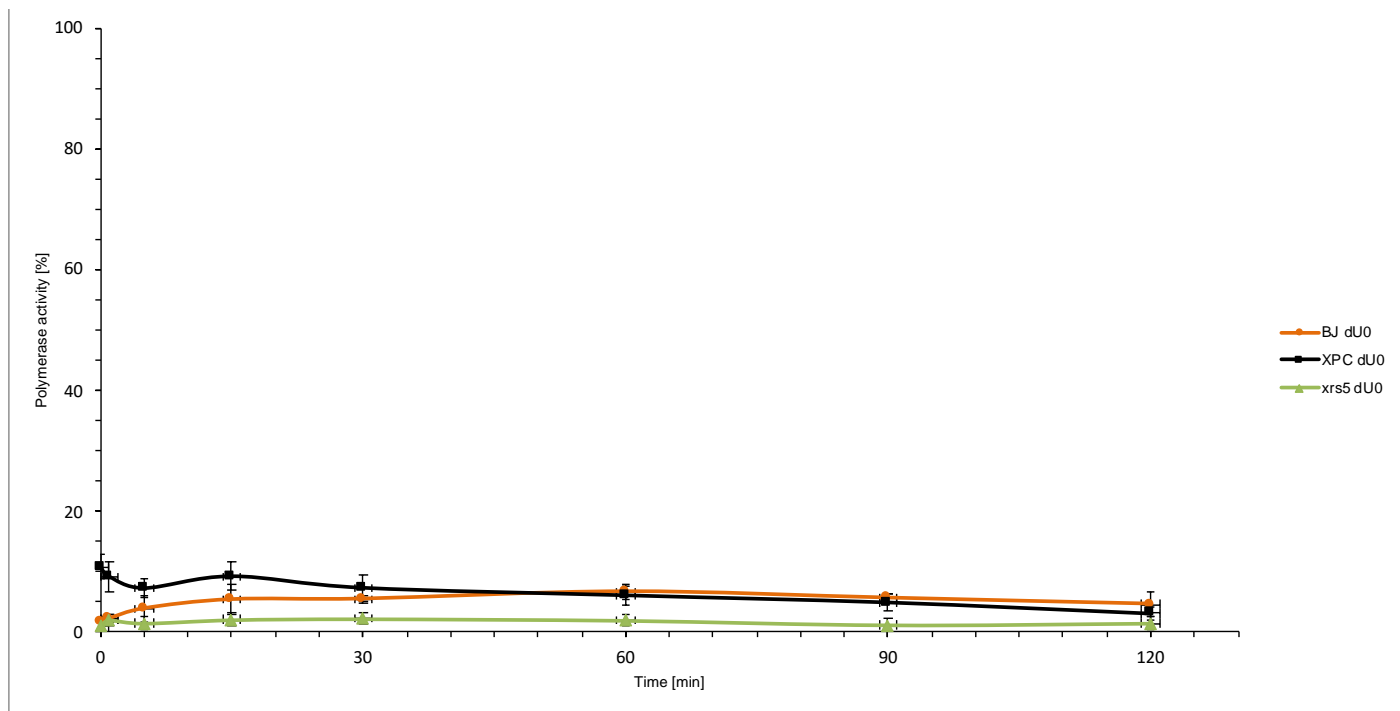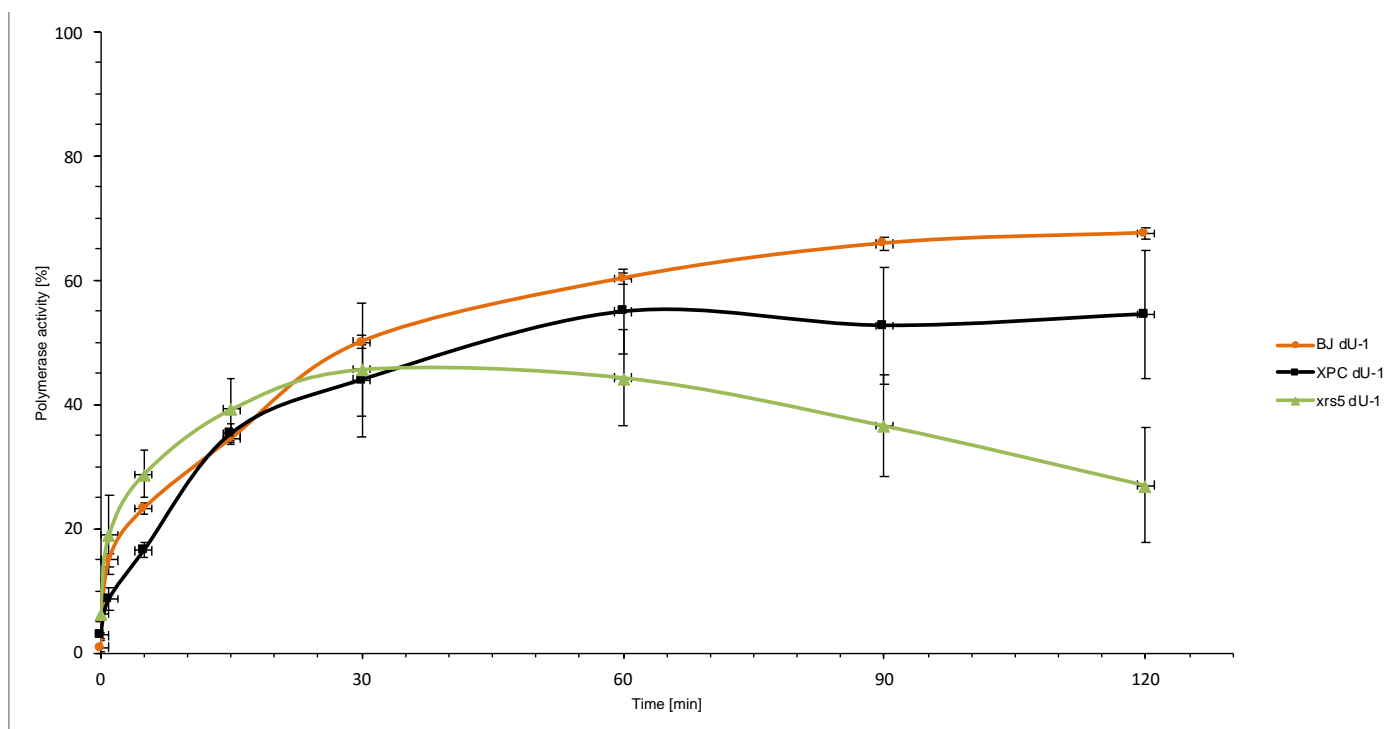



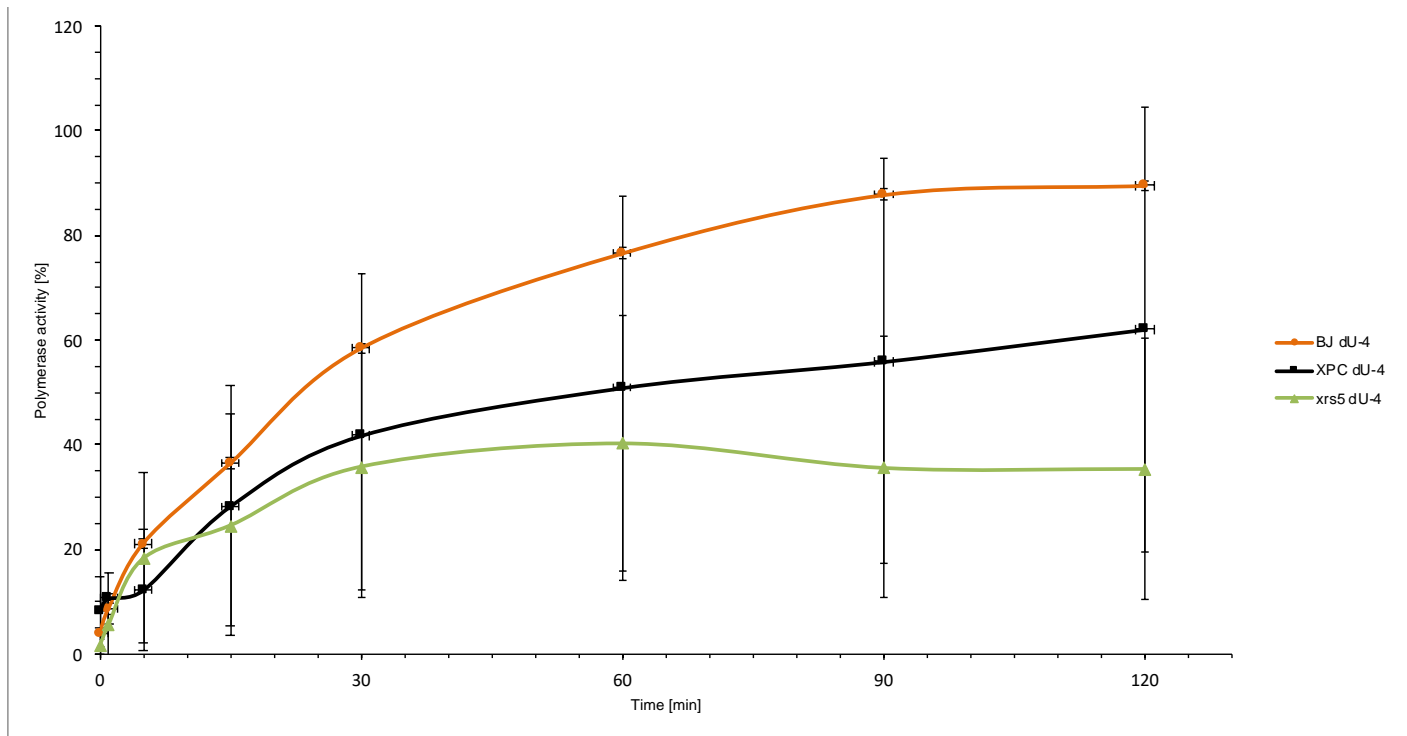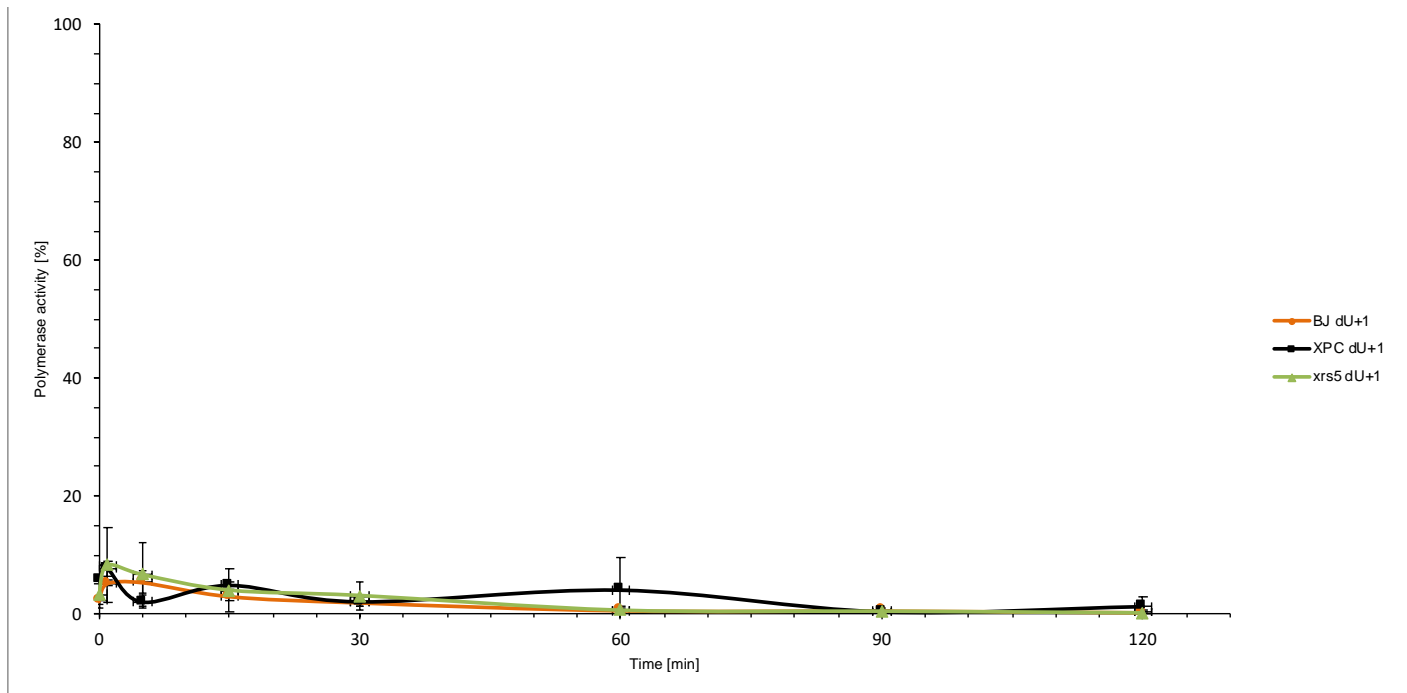

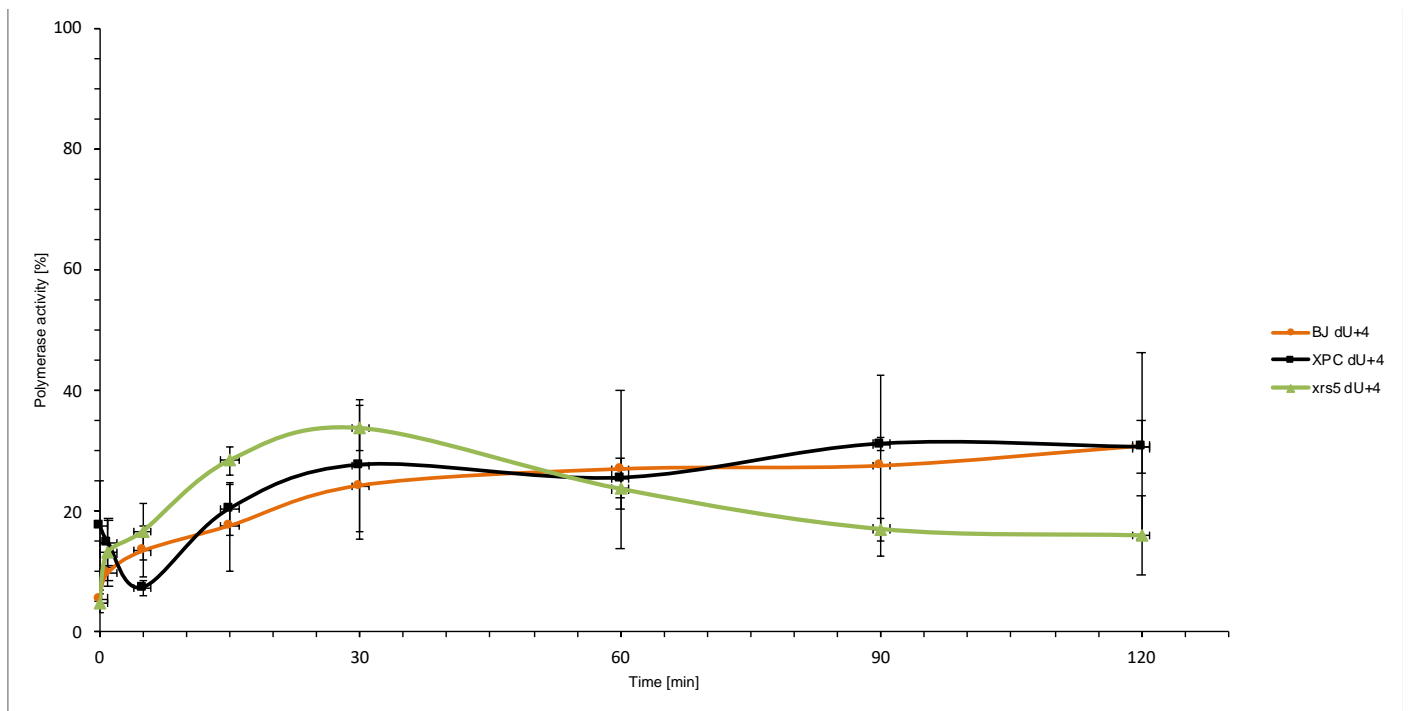

**Figure S13.** Polymerase activity (strand elongation) [%] of xrs5 vs. BJ vs. XPC – comparison of individual strands – **RcdA** Cytoplasmic Extract.

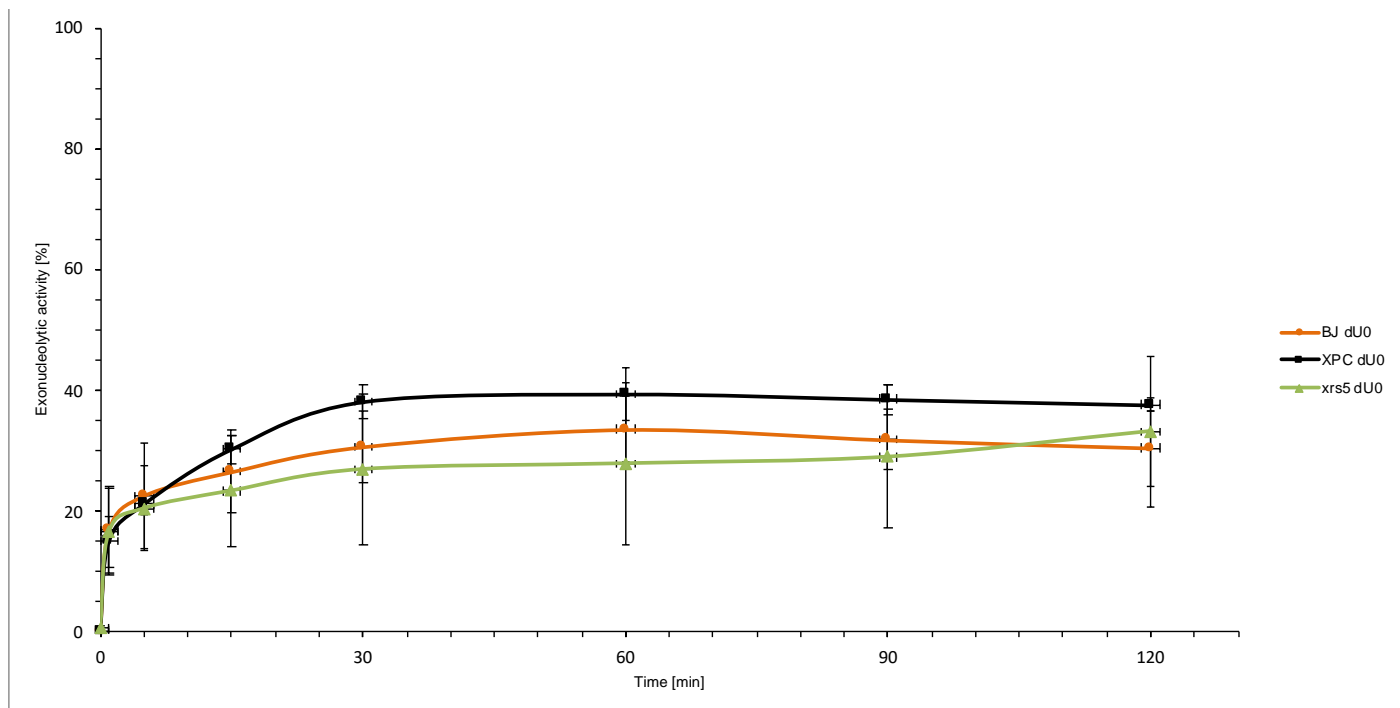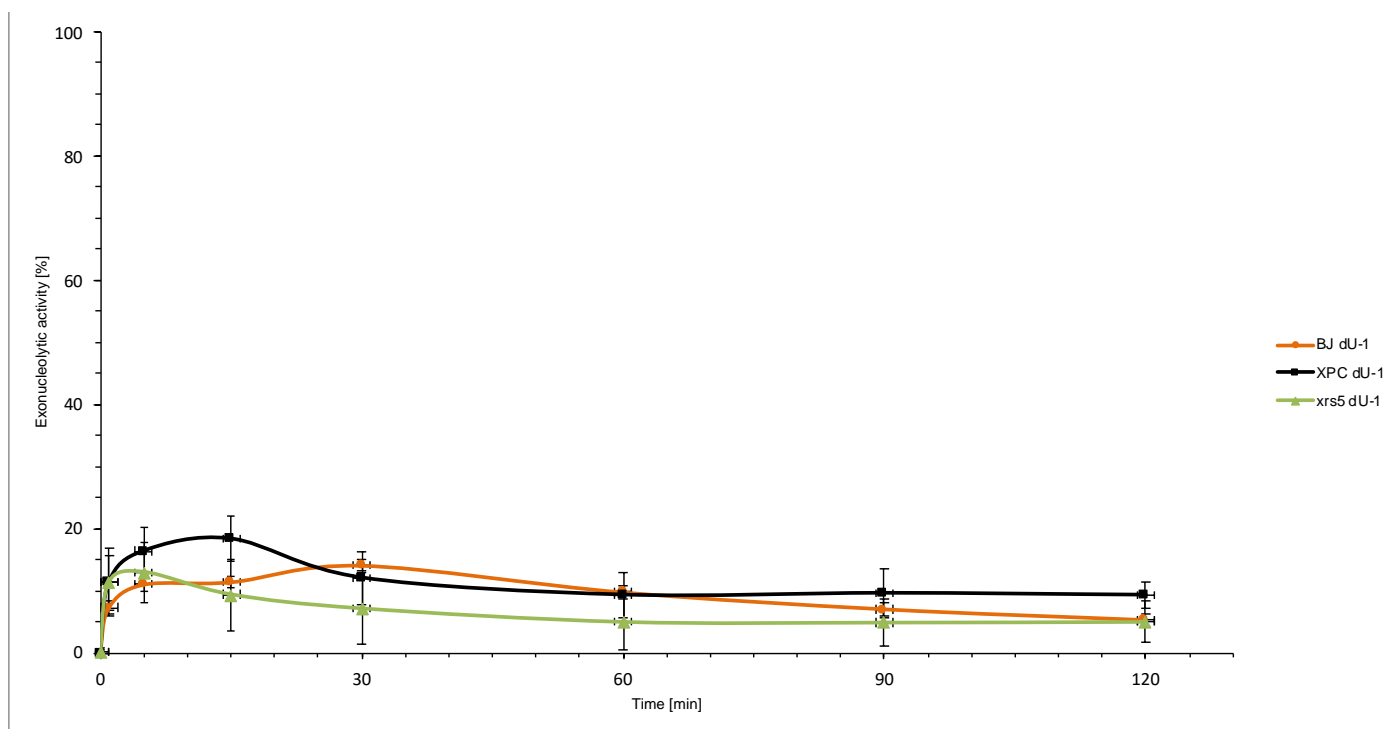

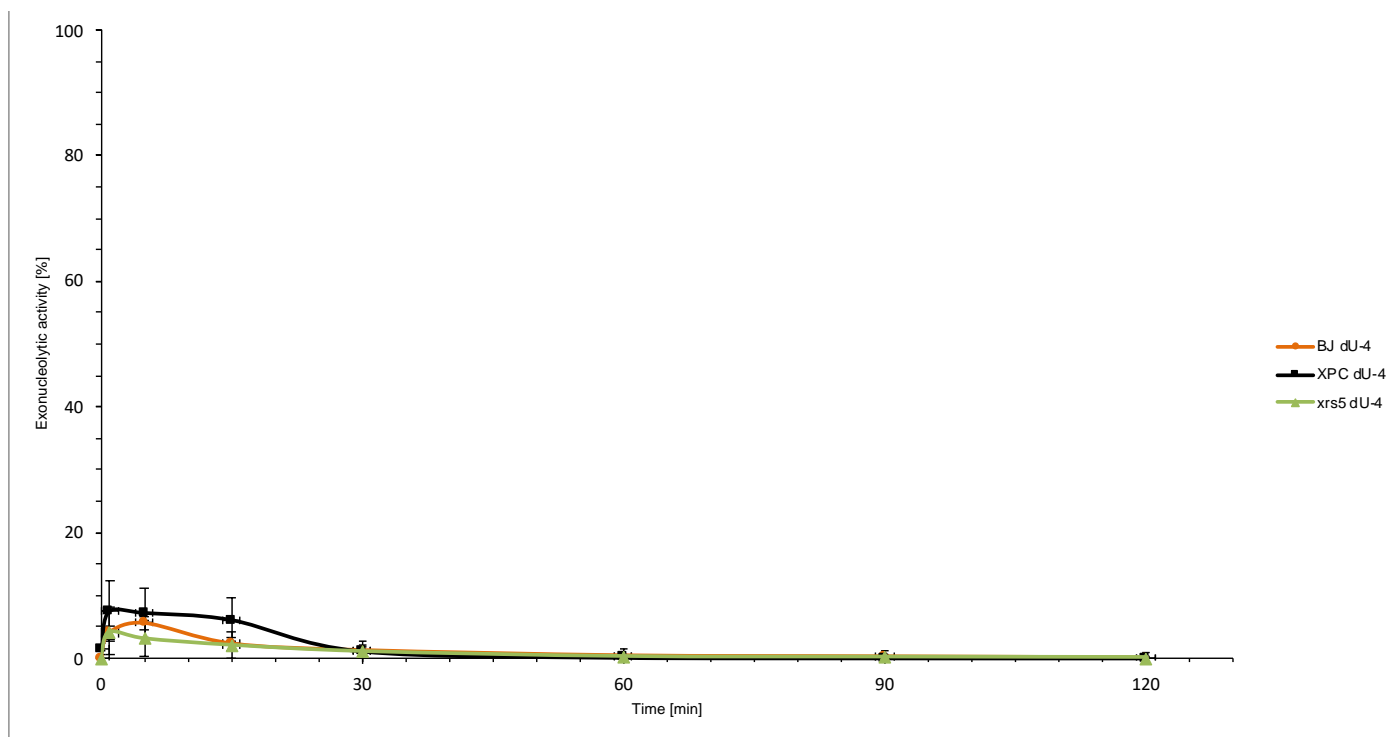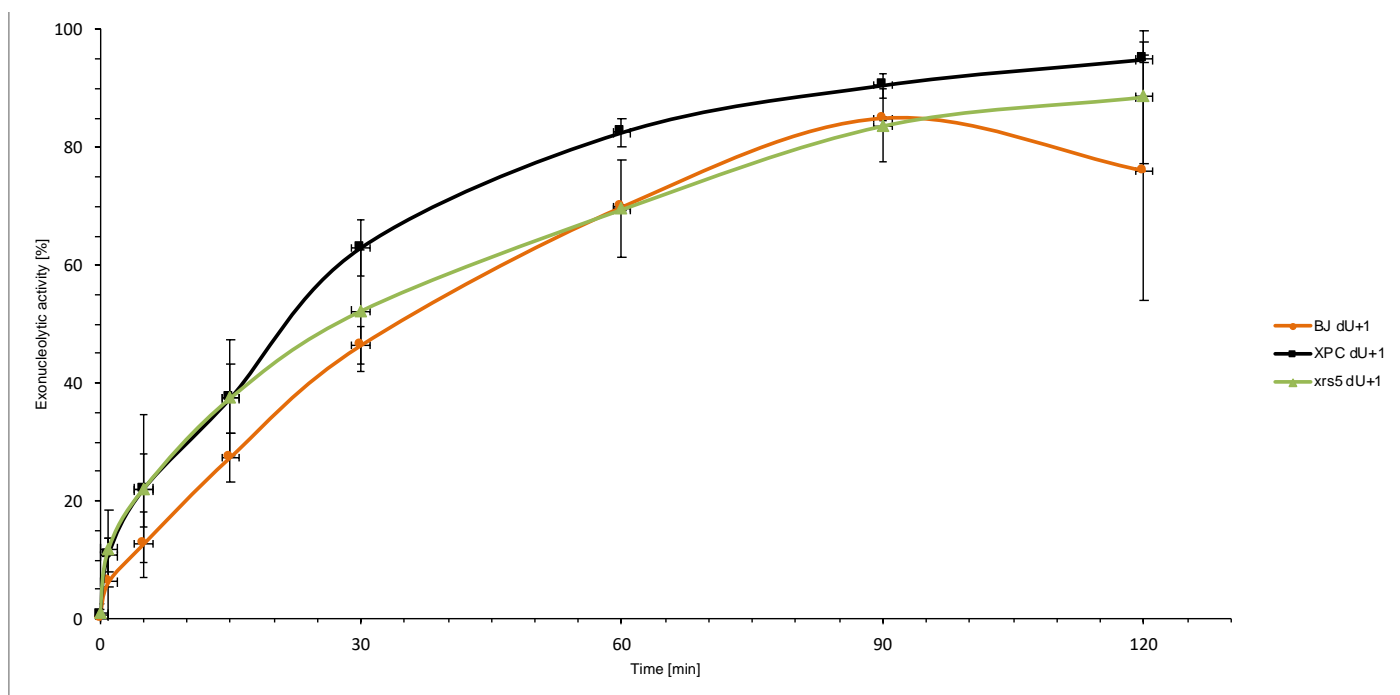

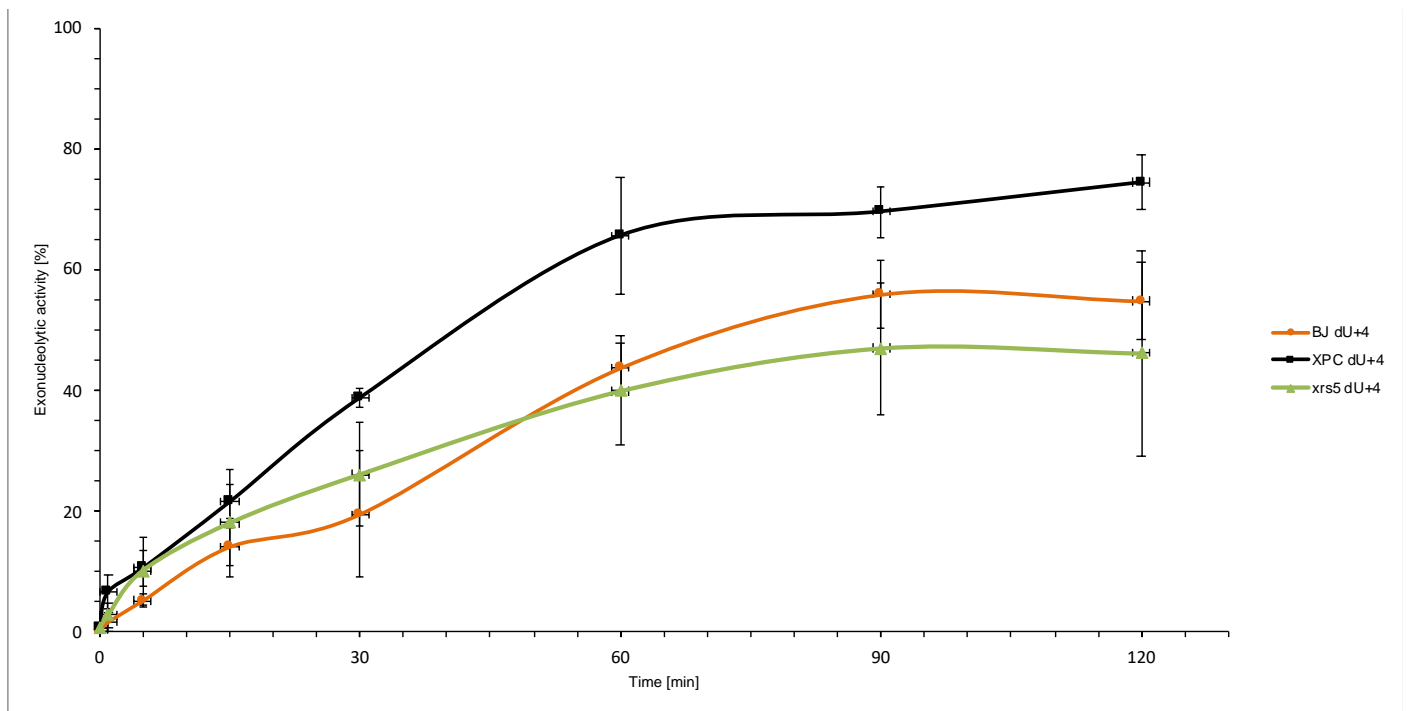

**Figure S14.** Exonucleolytic activity (strand degradation) [%] of xrs5 vs. BJ vs. XPC – comparison of individual strands – **ScdA** Cytoplasmic Extract.

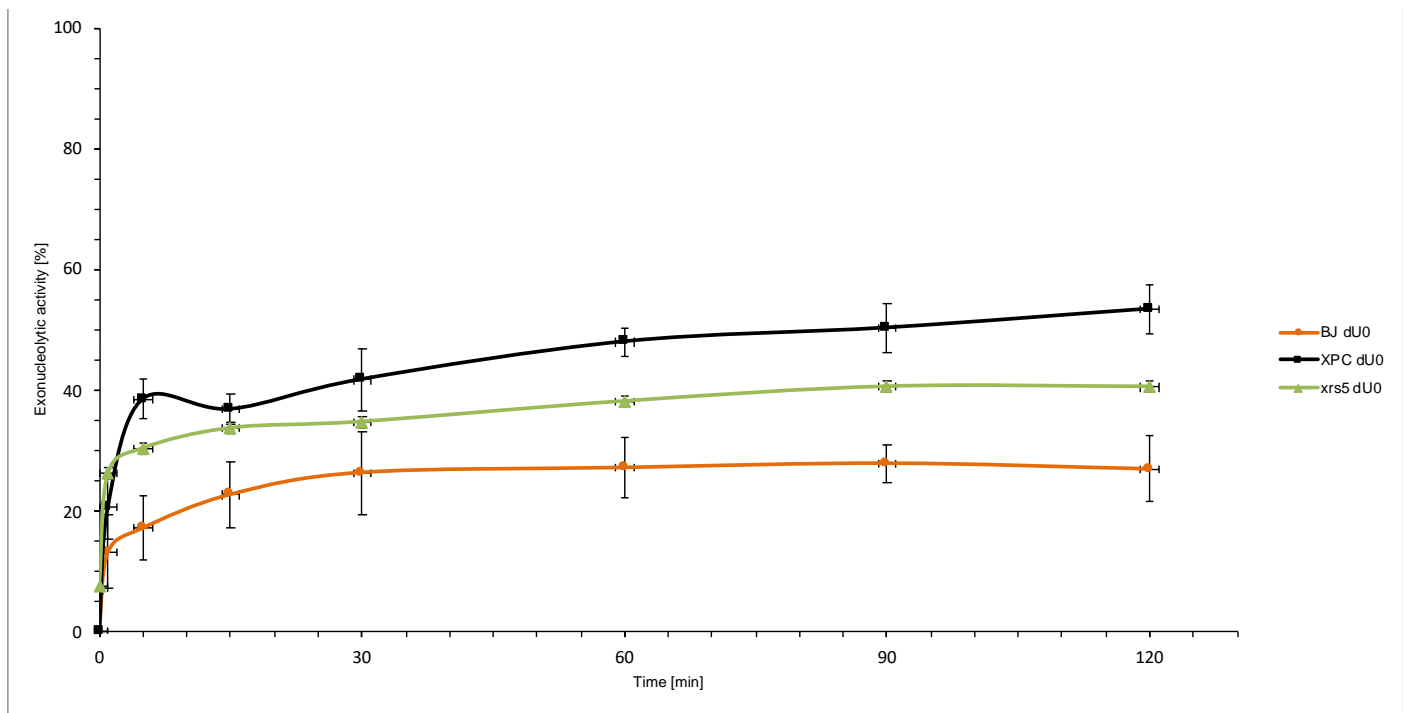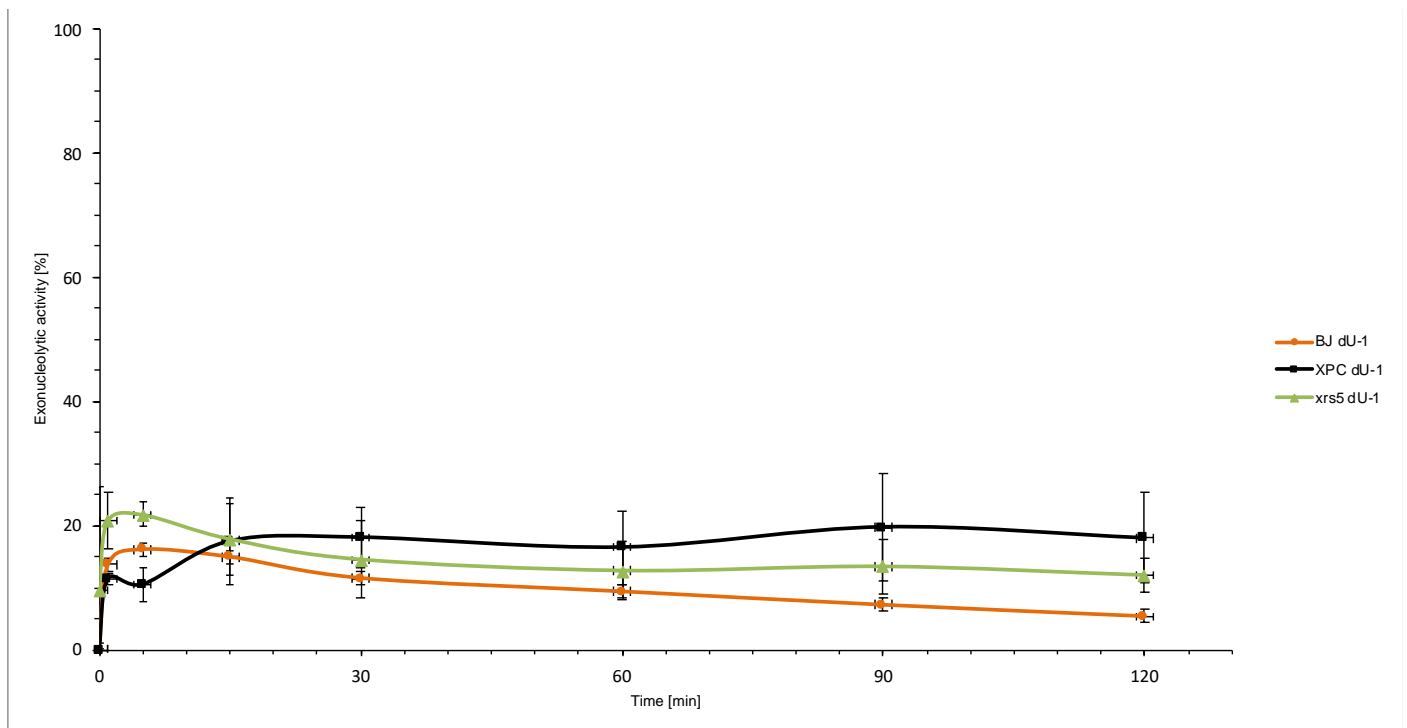

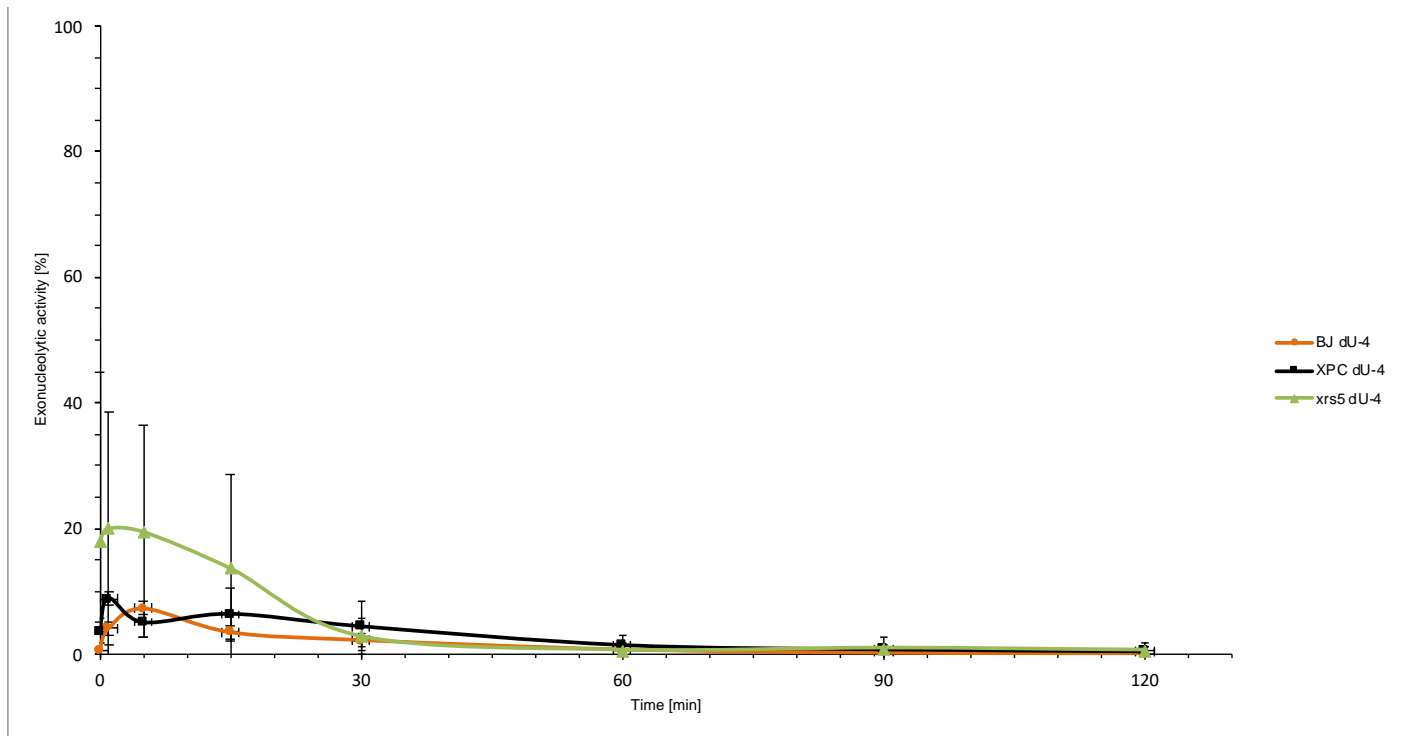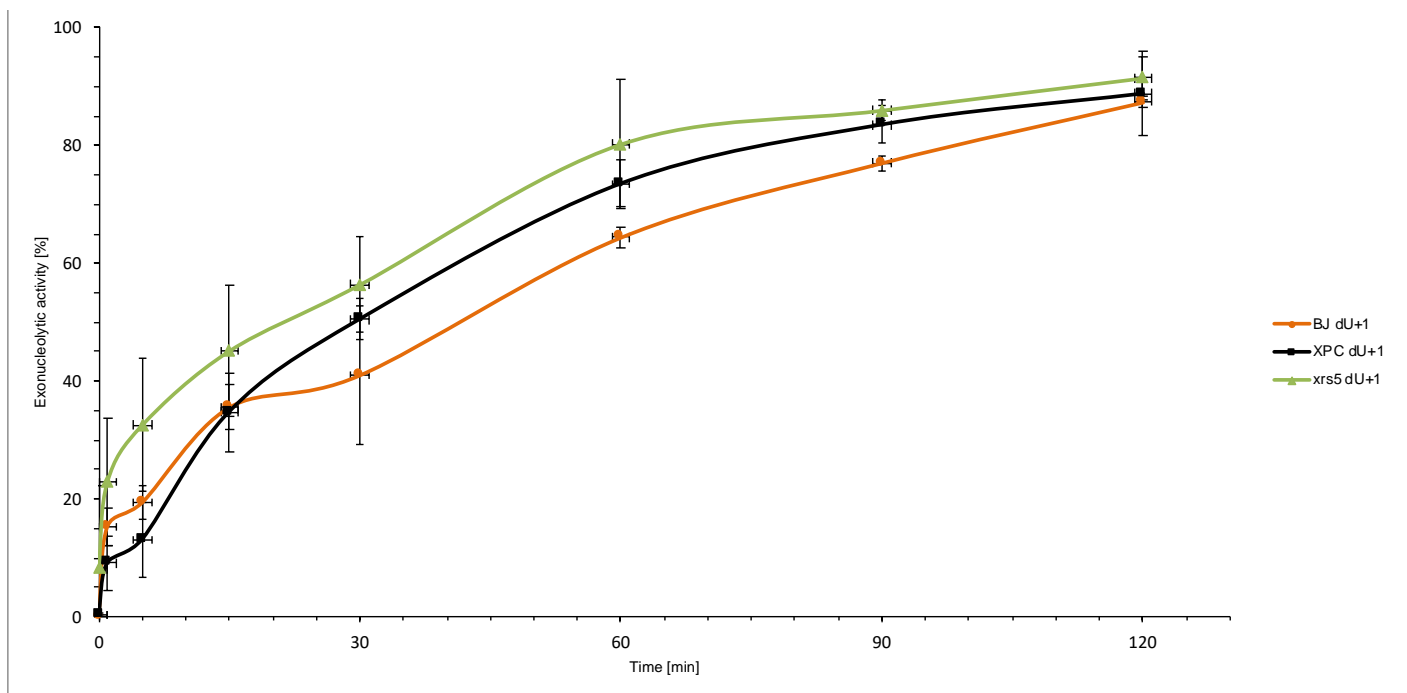

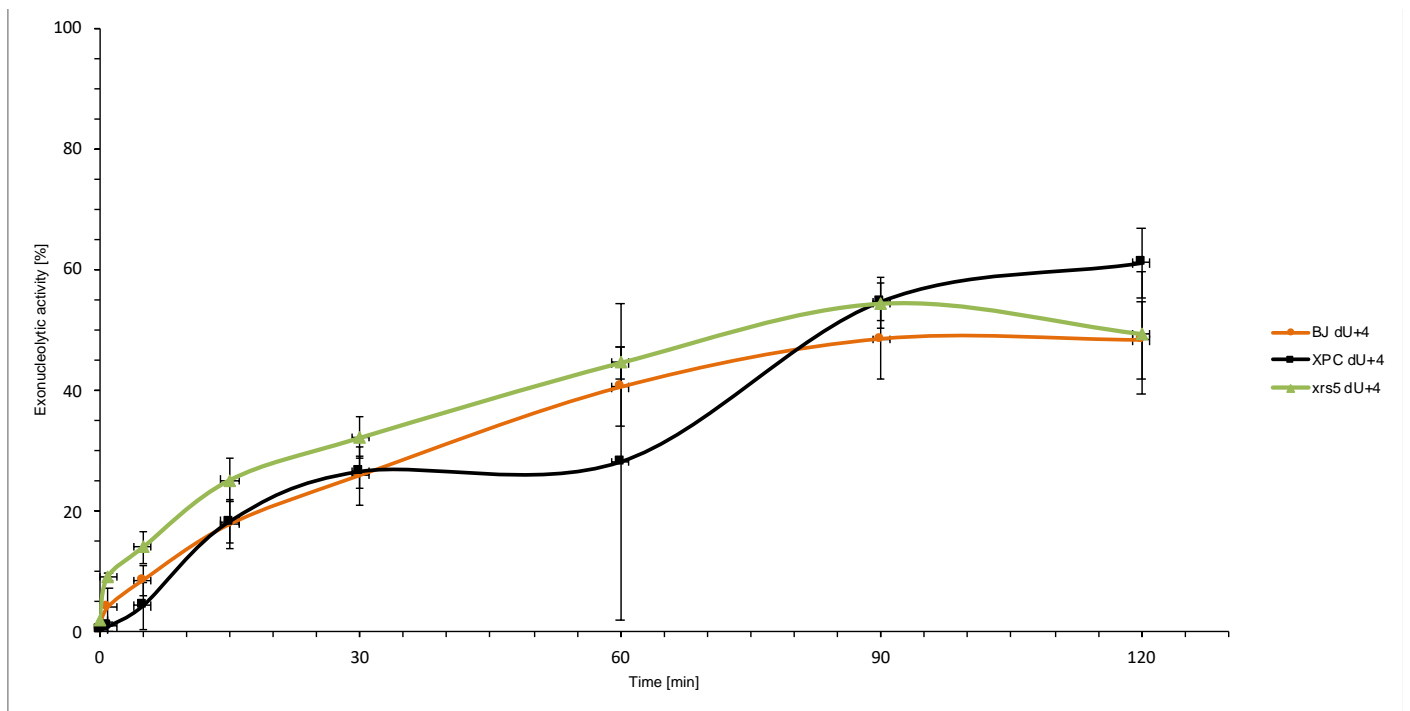

**Figure S15.** Exonucleolytic activity (strand degradation) [%] of xrs5 vs. BJ vs. XPC – comparison of individual strands – **RcdA** Cytoplasmic Extract.
